# Supplementary material
Source: publisher figshare collection journal article supplement (https://acs.figshare.com/ndownloader/files/9599344)
Supplement: Supplementary file 1 [file 9599344]

CCc1ccc(c(c1)Br)OCc2ccc(cc2)CC(=O)[O-]	C11801997
c1ccc2cc(ccc2c1)OCCOc3ccccc3/C=C/C(=O)[O-]	C11861431
CC(C)[C@@H](C(=O)[O-])Oc1c(cc(cc1Br)Cl)Cl	C11953916
C[C@@H](c1ccc(o1)C(=O)[O-])Oc2ccc(cc2Br)Cl	C11955959
c1ccc2c(c1)c(c(o2)C(=O)[O-])COc3ccc(cc3)Br	C20433639
Cc1ccc(c(c1)c2csc(n2)/N=C(/C(=C/c3ccccc3)/C#N)\[O-])C	C40927194
c1ccc(cc1)OCCOc2c(cccc2Br)C(=O)[O-]	C43458205
CCc1cccc(c1[N-]S(=O)(=O)c2cc(cnc2)Br)CC	C44243509
c1cc(cc(c1)S(=O)(=O)[N-]c2ccc(cc2)Cl)OC(F)(F)F	C24226619
Cc1ccc(cc1)c2ccc(cc2)OCc3nc(c(s3)C(=O)[O-])C	C64872551
c1ccc2c(c1)nc(o2)/C(=C\c3ccc(c(c3)Br)F)/CC(=O)[O-]	C22089089
c1cc(c(cc1Cl)Cl)C(=O)[C@@H]([C@@H](C(Cl)(Cl)Cl)[O-])Br	C03160216
CC(=O)c1c(cc(s1)c2ccccc2)[N-]S(=O)(=O)c3ccccc3	C01027878
CC(C)CC[C@](C)(C(=O)[O-])Oc1ccccc1I	C41962496
C=C/C=N/N=C\1/c2ccccc2C(=C1C(=O)C(c3ccccc3)c4ccccc4)[O-]	C37633016
c1cc(cc(c1)OC(F)(F)F)[N-]S(=O)(=O)c2c(ccs2)Br	C48440940
CCc1csc(n1)c2ccc(s2)S(=O)(=O)[N-]c3cc(cc(c3)F)F	C64769344
C[C@H]1CC(=CC[C@H]1/C=C/C(=O)C[C@@H]2c3c(cc4c(c3OC)OCO4)CC[N+]2(C)C)C	C01280007
COc1ccc(cc1)/C=N/[N+]2=C([C@@H](N=C2N)c3ccccc3)c4ccccc4	C15221331
C[N+]1(C/C(=C\C=C\c2ccccc2)/C(=O)/C(=C\C=C/c3ccccc3)/C1)C	C17197523
COc1ccc(cc1F)C(=O)/C(=C(\NCC=C)/S)/[n+]2ccc3c(c2)CCCC3	C27058286
CCCCn1cc[n+](c1)CC(=O)N[C@H](C)c2ccc(cc2)Br	C44795753
C[NH+](Cc1cc(sc1)Br)Cc2nnc(o2)[C@@H]3CCCO3	C49491715
CC[n+]1c(ccn1C[C@H]2CC(C(=O)O2)(c3ccccc3)c4ccccc4)C	C13651183
c1ccc2c(c1)C(=O)c3ccc(cc3C2=O)C[n+]4ccccc4C5OCCO5	C04974719
CC[n+]1c2ccccc2sc1C=C3C=C(N(C(=C3)C)Cc4ccncc4)C	C03166386
CCOc1ccc(cc1)[C@@]2(C[N+]3=C(N2c4ccc(cc4)OC)CCCCC3)O	C13510443
CCCCn1cc[n+](c1)[C@H](C)C(=O)Nc2c(cc(cc2Cl)Cl)Cl	C44794747
c1ccc(cc1)OC[C@@H](Cn2cc[n+](c2)Cc3ccccc3Cl)O	C12848678
C[C@H](C(=O)NCCc1ccccc1)[n+]2ccc(cc2)Cc3ccccc3	C15455759
Cc1c(c([nH]c1C(=O)[C@@H](C)[n+]2ccc(cc2)C(=O)c3ccccc3)C)C(=O)C	C15456026
c1ccc(cc1)N2C3=[N+](CCCCC3)C[C@]2(c4ccc(cc4)[N+](=O)[O-])O	C01800409
c1cc(cc(c1)[N+](=O)[O-])[C@]2(CN(C3=[N+]2CCCS3)c4ccc(cc4)Br)O	C09369193
CN/C(=C(/C(=O)c1ccc2c(c1)OCCCO2)\[n+]3ccc4c(c3)CCCC4)/S	C27300998
CN(C)c1cc[n+](cc1)CC(=O)Nc2c(cc(cc2Cl)Cl)Cl	C04902413
CCN1c2ccc(cc2[C@H](CC1(C)C)C)/C=C/c3cc[n+](cc3)CCO	C38634883
Cc1ccccc1C(=O)N2CCC(CC2)C(=O)NNc3[n+](c4ccccc4s3)C	C39665434
CCC(CC)c1cc[n+](cc1)Cc2cc(=O)oc3c2cc4c(c3)CCC4	C24158923
[H]/N=C/1\C(=C\c2cn(c3c2cccc3)CCOc4ccccc4)\C(=O)N=C5[N+]1=C[C@@H](S5)C	C61950050
c1cc(cc(c1)C2=NC(=O)CC(=N2)c3cccnc3)CN4CC[NH2+]CC4	C63884383
Cc1cc(c[n+](c1)C2=C(C(=O)c3ccccc3C2=O)NS(=O)(=O)c4cccs4)C	C02349775
COc1cc2c3c(c1OC)-c4c(c5ccccc5[nH]4)[C@@H]6[C@H]3[NH+](CCC6)CC2	C05554553
C[NH+](Cc1[nH]c(=O)c2c(n1)c3ccccc3o2)[C@@H]4CCCc5c4cccc5	C07049430
CC1(C[C@H](C2=C(C1)N=C([C@H]3C2=c4ccccc4=[NH+]3)C(F)(F)F)NC=O)C	C38981394
c1ccc2=[NH+]CC(=c2c1)/C=C(\C#N)/C(=O)Nc3ccccc3Br	C39243200
C[NH2+][C@@H](c1ccc(cn1)Br)c2cc3c(cc2Br)OCCO3	C61861988
c1cc(ccc1c2nc(no2)C[C@H]3CCC[NH2+]C3)I	C63084513
CC1=C[C@H](NN1C)C(=O)N2CCC3=c4ccccc4=[NH+][C@@H]3[C@@H]2c5ccc(cc5)SC	C64040526
c1ccc2=[NH+][C@H]3[C@@H](N(CCC3=c2c1)Cc4cccs4)c5cccc(c5)O	C64143554
c1ccc2=[NH+]CC(=c2c1)CC(=O)Nc3ccccc3I	C64213530
CC(C)[NH+]1CN(CN(C1)c2nc3ccccc3s2)c4nc5ccccc5s4	C02440503
c1ccc2c(c1)ccc3c2ccc([o+]3)/C=C\c4c5ccccc5ccc4O	C05604969
Cc1ccc(c(c1)[C@@H](c2cc(ccc2Cl)Br)[NH2+]C)C	C35489425
Cc1ccc(cc1C)C2=Nc3[nH+]c4ccccc4n3[C@@H](C2)c5ccccc5F	C13812825
c1ccc2c(c1)cccc2/C=N/N3[C@H](N=[NH+]C3=S)c4ccccc4F	C38984627
Cc1c2c(cc3c1OC[NH+](C3)Cc4ccc(cc4)Cl)c5c(c(=O)o2)CCC5	C05235667
C[C@@H]1CCc2c(c3c(ncnc3s2)N4CC[NH+](CC4)Cc5ccc(cc5)F)C1	C01472991
Cc1cccc(c1)[C@@H]2[NH+]=NC(=S)N2/N=C/c3cccc(c3Cl)Cl	C38994621
CCOc1ccc(cc1)/N=C\2/CCCC3=c4cc(ccc4=[NH+][C@H]32)Br	C00978709
CSc1ccc(cc1)[C@@H]2[C@@H]3C(=c4ccccc4=[NH+]3)CCN2C(=O)c5ccco5	C63697516
Cc1c(cccc1Cl)N2[C@H](N=[NH+]C2=S)C3=CC4=C(C(=N[C@H]4C=C3)C)C	C63730023
Cc1ccccc1c2nc(cs2)C(=O)N3C[C@H](Cc4c3cccc4)[NH+](C)C	C67206681
Cc1ccc(cc1)C(=O)[C@@H]2[C@H]([C@@H]3CSC[NH+]3[C@]24c5ccccc5NC4=O)c6ccccc6	C09233369
CC(C)c1c(c(=O)c2ccc(c(c2o1)C[NH+](C)C)O)c3nc4ccccc4s3	C28121161
c1cc2n(c1)CCC[NH+]([C@@H]2c3ccc(c(c3)Cl)Cl)Cc4cc(ccc4O)Cl	C35790345
Cc1cccc(c1NC(=O)N2CCN(CC2)c3cc[nH+]c4c3ccc(c4)Cl)Cl	C04324523
c1ccc2=[NH+][C@@H]3C(=c2c1)C=C(N=C3c4ccc5c(c4)OCO5)C(=O)NC6CCCCCCC6	C38564838
c1ccc2=[NH+]CC(=c2c1)/C=C\3/C(=O)N/C(=N/c4cccc(c4Cl)Cl)/S3	C38802773
CC[NH2+]C1C[C@H]2CC[C@@H](C1)N2c3c(cc(cc3Cl)Br)Cl	C54627867
c1ccc2c(c1)[nH]c(n2)c\3cc4cc(ccc4o/c3=[NH+]\c5ccccc5F)Br	C05800910
c1ccc(cc1)c2c(c(=O)n([nH]2)c3nc4ccccc4s3)/C=[NH+]/C5CCCCC5	C15930321
CCc1ccc(cc1)/C=C/2\C(=O)c3c(cc(c(c3O2)C[NH+]4CCC[C@H](C4)C)O)C	C41512216
Cc1cc(c(c2c1C(=O)/C(=C\c3cccs3)/O2)C[NH+]4C[C@H](C[C@@H](C4)C)C)O	C41515159
c1cc(c(c(c1Cl)/C=N/Nc2cn[nH]c(=O)n2)Cl)Cl	C05646647
Cc1cn[nH]c1[C@H]2CCCN(C2)C(=O)c3c4c(n[nH]3)CCCC4	C12246312
c1csc2n1c(c(n2)Cl)S(=O)(=O)N[C@@H]3CCCC[C@H]3O	C52008938
Cc1cc2n(n1)[C@@H](CC(=O)N2)C(=O)Nc3ccc(cc3Cl)Cl	C20736100
c1cc(cc(c1)C2=NO[C@@H](N2)C3=CC=C[C@H]4C3=CC=N4)c5ccn[nH]5	C64526012
C[C@@H](C(=O)NC(=O)NC)Sc1cc2c(cc1Cl)OCCO2	C66262664
CC(=O)N1CCN(CC1)[C@H]2CS(=O)(=O)C[C@H]2[NH3+]	C31990173
C[N+](=CNc1nc2nccc(n2n1)c3ccccc3)C	C33372183
C[C@H]1CN(C[C@@H](O1)C)C(=O)C(=O)N2CC[NH2+]CC2	C36904436
CC[N+](=c1ccc-2cc(c(oc2c1)O)C(=O)N)CC	C37858734
CO[C@@H]1C[C@H]([N+]2=C1Nc3ccccc3C2)C(=O)N(c4ccccc4O)O	C39545491
CC[n+]1c(c(cc2c1nc3c(cccn3c2=O)C)C(=O)NC(C)C)N	C39841336
C1CS(=O)(=O)C[C@@H]1c2nnc(o2)C3CC[NH2+]CC3	C36155082
C1CS(=O)(=O)C[C@H]1CNS(=O)(=O)N2CC[NH2+]CC2	C40862252
CS(=O)(=O)c1ccc(cc1)c2nc(no2)[C@H](C3CC3)[NH3+]	C41124784
CC[NH+]1CCN(CC1)C(=O)N2CC[NH+](CC2)[C@@H](C)C(=O)[O-]	C51661193
CS(=O)(=O)N1CCN(CC1)[C@H](C[NH3+])[C@H]2CCOC2	C62082411
C[C@H]1CCCN(C1)C2=NC(=[N+]3CCCC3)[C@@H]4C(=NN=N4)N2	C64426931
c1cc(cc(c1)[C@@H]2C=CN=[NH+]2)[C@H]3CN4C(=C[C@@H](N4)C(=O)[O-])[NH+]=C3	C39518835
COc1cc(cc(c1O)OC)/C=C\2/C(=O)N(C(=S)S2)CCS(=O)(=O)[O-]	C09972485
CC[C@@H](C)[C@@H](C(=O)[O-])NC(=O)c1c(c2c(s1)ncn(c2=O)C)C	C31948455
Cc1c(c(n(n1)CC(=O)[O-])C)S(=O)(=O)N(C)CC(=O)NC	C35659069
Cc1c(c(c(o1)C)S(=O)(=O)N[C@@H](C)C(=O)N(C)C)C(=O)[O-]	C36133479
Cc1c(sc(n1)C)C(=O)C2=C(C(=O)N[C@@H]2c3cccnc3)[O-]	C40125010
c1cc(c(cc1[N+](=O)[O-])Cl)C(=O)N[C@]2(CCSC2)C(=O)[O-]	C43510944
CS(=O)(=O)c1nc([n-]n1)NC(=O)c2ccc(cc2)N3CCCC3=O	C64348021
CCc1cccc(c1NC(=O)CO/N=C/c2cccc(c2Cl)Cl)C	C05467779
C[C@@H](c1ccc2c(c1)CCCC2)NC(=O)COC(=O)c3c(cccc3F)F	C07756582
Cc1c(c(n(n1)CC(C)C)C)CC(=O)N[C@H](C)c2cccc3c2cccc3	C23434023
C[C@@H](c1ccc(c(c1)F)OC)NC(=O)CSc2nc3ccccc3s2	C24314382
CN(C)C(=O)Sc1ccccc1NC(=O)/C=C/c2ccc(cc2)SC	C67021764
CC(C)(C)NC(=O)c1ccccc1NC(=O)c2ccccc2Br	C01215576
Cc1c(ccc2c1nc(s2)NNC(=O)c3ccc(cc3)SC)Cl	C05272009
c1cc(sc1)c2nnc(n2N)SCc3ccc(cc3)Br	C09290967
c1ccc(c(c1)[C@H]2[C@H]3CC=C[C@@H]3c4cc(ccc4N2)OC[C@@H]5CCCO5)O	C14474450
C[C@H](C12CC3CC(C1)CC(C3)C2)NC(=O)C[C@@H]4C(=O)Nc5ccccc5S4	C15737534
Cc1cc(nc(n1)SCCOc2ccc(cc2Br)Cl)N	C29914034
CCc1ccccc1N[C@H](c2ccc3ccc(nc3c2O)C)c4ccccn4	C54619229
CC(C)CCc1nc(on1)c2cc(ccc2N)I	C62824339
Cc1c([nH]c2c1cc(cc2)CNC(=O)N(C)Cc3ccc(c(c3)F)F)C	C65031428
C[NH+](C)CCNC(=O)c1cccc2c1nc(c3c2cccc3)c4cccnc4	C01613479
CCn1cc(cn1)C[NH+]2CCc3c(c(n[nH]3)c4ccc(cc4)C(F)(F)F)C2	C11664437
CC(C)(C#Cc1ccc(o1)C(=O)N2CC[C@@]3(C2)CCC[NH+](C3)CC4CC4)O	C12835307
c1ccnc(c1)n2c3c(cn2)[C@@H](CCC3)[NH2+]CC4=Cc5cc(ccc5OC4)Cl	C20915916
c1ccc2c(c1)CC(C2)[NH+]3CCC[C@H](C3)C(=O)Nc4cccc(c4)n5cccn5	C23145783
CC(C)C(=O)N1CCC(CC1)[NH+]2CCC(CC2)C(=O)N[C@@H]3CCCc4c3cccc4	C34912314
CC[NH+]1CCC(CC1)n2c(ccn2)NC(=O)[C@H]3CCC[C@@H](C3)C(F)(F)F	C66663133
C[C@@](CCc1ccc2c(c1)OCO2)(C#N)N(C)C	C37355107
C[C@@H]1CCN(c2c1cccc2)Cc3nc(no3)C4CC4	C42147357
Cc1cc(c(n1c2ccon2)C)C(=O)[C@H](C)Cl	C61685585
c1cc(sc1)/C(=C/c2ccc(cc2)Br)/C(=O)[O-]	C04218821
c1cc(ccc1c2ccc(s2)/C=C/C(=O)[O-])Br	C12760869
C1[C@H]2CC3(C[C@@H]1CC(C2)(C3)C([C@H](C(F)(F)F)F)(F)F)C(=O)[O-]	C13468031
Cc1ccc(n1c2c(c3c(s2)C[C@H](CC3)C(C)(C)C)C(=O)[O-])C	C15014553
CCc1ccc(cc1)c2c3cnc4ccc(cc4c3sc2C(=O)[O-])F	C15828935
c1ccc(c(c1)CSc2ccccc2C(=O)[O-])Br	C19485340
c1cc(sc1)C(=C(C(=O)c2cccs2)Br)[O-]	C03107498
CCCc1nnc(n1c2cc(c(cc2Cl)Cl)Cl)[S-]	C20589416
c1cc(c(c(c1)Cl)CSc2[n-]c3cc(cnc3n2)Cl)F	C06188131
CC(C)Cc1c(sc(n1)c2c(cccc2Cl)F)C(=O)[O-]	C41566731
CSc1ccc(cc1)[N-]S(=O)(=O)c2c(ccs2)Br	C42350536
CCc1ccsc1/C(=C(/C#N)\C(=O)c2c(ccs2)C)/[O-]	C49004825
c1ccc2c(c1)[C@@](CCS2)(C(=O)[O-])Sc3cccc(c3)Cl	C54186115
c1ccc(c(c1)Sc2c(cc3c(n2)CCC3)C(=O)[O-])Br	C54554091
c1cc(sc1)/C=C/2\C(=O)N=C(S2)[N-]c3ccc(cc3)Cl	C18055888
c1cc(c(c(c1)Cl)[N-]S(=O)(=O)c2ccc(cc2)Cl)Cl	C59455962
c1cc(ccc1S(=O)(=O)[N-]c2cc(c(cc2F)F)F)Br	C61095164
CCSC1=C([C@@H](C2=C(CCCC2=N1)[O-])c3ccc(cc3)Cl)C#N	C12899482
c1cc(ccc1OCC(=O)Oc2ccc(cc2Br)Cl)Cl	C06527989
c1ccc2c(c1)CCC[C@H]2N(C[C@@H]3CCC=CC3)C(=O)c4cccc5c4nccc5	C06728066
CCn1c(nnc1SCc2c(c(c(c(c2F)F)F)F)F)c3ccccc3	C11020622
c1ccc(cc1)[C@H](c2ccc(cc2)Cl)N3CCN(CC3)C(=O)Cc4cccs4	C23320275
c1cc(ccc1C2SCCS2)OC(=O)Cc3csc(n3)c4ccsc4	C24176375
CCCN1C(=O)/C(=C\c2ccc(cc2)OCc3ccccc3Cl)/SC1=S	C40005906
CC(C)c1ccc(cc1)CN(C)S(=O)(=O)c2c(ccs2)Br	C48443549
CCN(C[C@H]1CCOC1)C(=O)c2ccc(s2)c3ccc(cc3)Br	C64320292
Cc1c(nc(s1)c2c[nH]c3c2cccc3)c4c[nH]c5c4cccc5	C00152222
CC(C)c1ccc(cc1)[C@@H]2[C@@H]3CC=C[C@@H]3c4cc(ccc4N2)O	C14462479
c1ccc(c(c1)[C@H]2[C@@H]3CC=C[C@@H]3c4cc(cc(c4N2)Cl)Cl)O	C14473664
CC(C)c1cccc2c1N[C@H]([C@@H]3[C@@H]2C=CC3)c4c5ccccc5ccc4O	C14548177
c1ccc2c(c1)cccc2c3csc(n3)[C@H](c4ccccc4Cl)N	C19930226
CC(C)c1ccc(cc1)[C@@H]2[C@@H]3CC=C[C@H]3c4cc(ccc4N2)O	C20697676
c1ccc(c(c1)[C@H]2[C@@H]3CC=C[C@H]3c4cc(cc(c4N2)Cl)Cl)O	C20706623
CC(C)n1c2c(cccc2Cl)nc1c3ccc(c(c3)N)Cl	C37444247
c1cc2c(c(c1)F)c(nc(c2c3ccc(cc3)Cl)N)Br	C01391577
Cc1ccc2c(c1)nc(s2)c3cc(ccc3N)I	C62824274
Cc1ccc2c(c1C)N[C@H]([C@H]3[C@H]2C=CC3)c4ccc(c(c4)OC)O	C20693067
C[C@H](c1cccs1)n2c3ccc(cc3nc2N)Br	C36899820
c1cc(sc1)NC(=O)Nc2c(cc(cc2Br)F)F	C05135480
CC[C@H]1c2ccsc2CCN1C(=O)c3ccc(cc3N)Cl	C40325958
C[C@@H]1C[C@@H](CN(C1)c2c(cc3c(n2)CCCC3)C(=S)N)C	C43410777
Cc1c(c(n(n1)c2ccccc2Cl)N)I	C43665009
C[C@@H]1CCC[C@H](C1n2c(c(cn2)I)N)C	C43666593
Cc1cccc(c1C)Cn2c(c(cn2)I)N	C43667237
Cc1cc(cc(c1)Cn2c(c(cn2)I)N)C	C43667240
c1cc2c(cc1Cl)CC[C@@H]2NC(=O)c3cc(c[nH]3)Br	C49318400
C[C@@H](c1ccc(cc1Cl)Cl)n2cnc3c2ccc(c3)N	C52841958
C[C@@H](c1ccc(cc1)Br)n2cnc3c2ccc(c3)N	C52854748
Cn1c2ccccc2nc1[C@H](c3ccc(cc3)Br)N	C58433067
c1cc2c(c(c1)Br)NC(=O)[C@@H]2Nc3c(cccc3F)F	C42080662
c1ccc(c(c1)[C@H]2C3=C(c4ccccc4C3=O)NC(=S)N2)F	C01406975
C1C2CC3CC1CC(C2)(C3)C4=NN[C@](C4)(C(F)(F)F)O	C00114760
CC1=CS[C@H]2[C@H]1C(=C(S2)C3=NN[C@@](C3)(C(F)(F)F)O)C	C04390827
c1ccc2c(c1)cc([nH]2)C(=O)N[C@H]3CCCc4c3cccc4	C08077850
c1cc(c(cc1Cn2cnc3c2ccc(c3)N)Cl)Cl	C08699371
c1cc2c(cc1N)nc(o2)c3cc(ccc3F)Br	C19802409
C[C@H]1Cc2ccccc2N1c3c(cc(cn3)Br)N	C36242786
C[C@@H](c1ccccc1Cl)n2c(c(cn2)Br)N	C43666287
[H]/N=C/1\C(=C2CCC[C@@H]2S1)c3[nH]c4cc(c(cc4n3)F)F	C35412232
Cc1c(c(n(n1)C2CCC(CC2)C)N)I	C43668857
c1ccc(cc1)n2c(cc(n2)c3cc(c(c(c3)F)F)F)N	C63007378
C#Cc1cccc(c1)N[C@H]2c3cc(ccc3NC2=O)Br	C19876857
Cc1ccc(cc1)[C@@H]2[C@@H]3CC=C[C@@H]3c4cccc(c4N2)C(=O)NC	C14458666
Cc1ccccc1[C@H]2[C@@H]3CC=C[C@@H]3c4cccc(c4N2)C(=O)NC	C14478939
c1cc(cc(c1)N)c2cn3c(csc3n2)c4cccs4	C19767171
Cc1cccc2n1c(c(n2)c3ccc(cc3)Br)N	C36222126
C[C@H]1CCC[C@H](C1)N(C)c2c(cc(cn2)Br)N	C42492301
Cc1ccc(c(n1)N2CCc3c(ccs3)[C@H]2C)C(=S)N	C43398508
c1cc2c(cc1N)nc(n2c3ccc(cc3F)Cl)C4CC4	C52855368
CC(=O)Nc1ccc(cc1Br)C2=CSC3=NCCN23	C00348987
C[C@@H]1C(=[N+]([C@@](N1O)(C)c2ccc(cc2)Cl)[O-])c3cccs3	C00304803
c1c(c(cc2c1OCCO2)Br)NC(=O)[C@H]3CCC=CC3	C08040229
Cc1cnc(cn1)C(=O)Nc2cccc(c2)C#Cc3cccs3	C12921237
Cc1ccccc1NC(=O)[C@H]2CCn3c4ccccc4nc3C2	C21884165
c1ccnc(c1)Cn2c(=O)c3c4c(sc3[nH]c2=S)CCCCC4	C17071731
C[C@@H]1CCc2c(sc3c2c(=O)n(c(=S)[nH]3)Cc4cccnc4)C1	C17071733
Cc1c(cccc1Cl)NC(=O)c2cn(c3ccccc3c2=O)C	C41056949
c1cc(c(cc1Br)O)C(=O)N2CCO[C@@H]3[C@@H]2CCC3	C44491307
c1c(c(cc2c1OCCCO2)Br)[C@H](c3c[nH]nc3)Cl	C62779057
c1cc(sc1)[C@H]2CC(=Nc3c2ncn3c4cc(cc(c4)F)F)O	C40283148
C1CCc2c(c(c3c4=NC(=O)CC(=c4sc3n2)O)C(F)F)C1	C12428270
c1ccc2c(c1)[C@H](CS2(=O)=O)Nc3ccc(cn3)Cl	C35688323
c1c(c[nH]c1C(=O)N2CCO[C@H]3[C@@H]2CCCC3)Br	C37845488
c1ccnc(c1)C(=O)N2CCC(=CC2)c3c[nH]c4c3ccc(c4)F	C47294573
C[C@H]1C[NH+](CCCO1)[C@@]2(CCSc3c2cccc3)C(=O)[O-]	C61938825
C[C@H]1CCc2c(c(no2)C(=O)N[C@@H]3CCCc4c3cccc4)C1	C02806994
Cc1nc(c2c3c(sc2n1)CCC3)N[C@@H](C)c4ccncc4	C08707360
Cn1ccc(n1)NC(=O)/C=C/c2cccc(c2)Br	C12567347
Cc1cccc2c1c(c(s2)C(=O)Nc3nnc(s3)C)Cl	C25510627
C[C@@H](c1ccc(cc1)Br)NC(=O)c2csnn2	C41614217
Cc1c2c(nc(nc2sc1C(=O)Nc3cccc(c3)C#C)C)C	C45630918
c1ccc(c(c1)NC(=O)c2cnns2)I	C47409638
C[C@H]1CCc2c(sc(n2)NC(=O)/C=C\c3nccs3)C1	C48675044
Cc1cccc(c1C)NC(=O)Cn2ccc3c(c2=O)ccs3	C33173028
Cc1c2cc(cc(c2oc1C(=O)[O-])C[NH+]3CCCCCC3)F	C62182745
C[C@H]1C(=O)N=C(S1)N/N=C/c2ccc(cc2)Br	C06007965
Cc1nc2ccc(cc2s1)Nc3ncc(cn3)Br	C67347486
Cc1ccc(c(c1)C)C(=O)NNC(=O)c2cc3c(s2)CCC3	C17445539
c1ccc(cc1)C2=C[C@@H](C(C(=C2C#N)N)(C#N)C#N)c3ccc(cc3)F	C00352178
c1cc(c(c(c1)Br)Cn2cnc3ccsc3c2=O)N	C37402035
CC(C)c1nc2c(c(cs2)c3ccc(cc3)Cl)c(=O)n1N	C00502225
Cc1ccc2c(n1)ccc3c2[C@H](C4=C(N3)CCCC4=O)c5ccc(cc5)O	C04184908
COC(=O)c1c(nc(s1)N)c2cccc(c2)Br	C38537131
Cc1ccc(cc1)S(=O)(=O)N[C@@H](C)Cc2csc3c2cccc3	C04237584
c1ccc(c(c1)C(=O)c2cccs2)C(=O)NCc3cccs3	C10216586
c1ccc(c(c1)NCc2ccc(cc2)OCC#N)Br	C37203318
c1ccnc(c1)SCCNC(=O)c2ccc(cc2Cl)Cl	C02985797
Cc1cc2c(cc1C)n(c(n2)CCCO)Cc3ccccc3Cl	C40310953
c1ccc(c(c1)C(=O)Nc2ccccc2F)OCCBr	C41729305
C[C@H](c1ccc2c(c1)CCCC2)NC(=O)CSc3ccccn3	C07371048
Cc1ccc(cc1)[C@](C)(C(=O)[O-])[NH+](C)Cc2ccc(s2)Cl	C48971352
CCNc1ccc(cn1)COc2ccc(cc2Br)C	C50832657
Cc1cccc(c1NC(=O)Cc2csc(n2)c3ccccc3)C(C)C	C07264130
c1ccc(cc1)CONC(=O)CSc2ccc(cc2)Br	C08096849
CSc1ccccc1NC(=O)c2cccnc2Sc3ccccc3	C22924800
c1ccc(c(c1)NCc2ccc(o2)Br)OCC(F)(F)F	C36981383
Cc1c(c(n(n1)C)C)[C@H](C)N[C@@H](C)Cc2ccc(cc2)Br	C45170546
c1cc(c(cc1Cl)Br)OCC(=O)NC[C@H]2CCC=CC2	C49278801
CCSCc1ccc(cc1)C(=O)Nc2cccc(n2)Br	C49424088
c1cc(cc(c1)F)[C@H]2CCCN2C[C@H](c3ccc(cc3)OC(F)F)O	C60479269
C[C@H](c1ccc(cc1)F)S(=O)(=O)C[C@@H](c2ccc(cc2)C(C)C)O	C66500412
C[C@H](CSC)C(=O)NC1CCN(CC1)c2ccc(cc2)C(C)(C)C	C66774189
c1ccc(cc1)CC(=O)N[C@H](C(Cl)(Cl)Cl)Sc2ccccn2	C03121423
C[C@@H](c1ccc(cc1)F)NC(=O)[C@@H](C)SC2=Nc3ccccc3CS2	C06588311
c1ccc(cc1)CCNC(=O)COc2ccc(cc2)C3SCCCS3	C14244099
C[C@H](C(=O)NCc1cccs1)SCc2cc(ccc2OC)Br	C15494896
Cc1ccc2c(c1)[nH]c(=S)n2/C=C(/c3ccccc3)\[S@@](=O)Cc4ccccc4	C17223411
c1ccnc(c1)CNC(=O)/C(=C/c2ccc(cc2)Br)/c3cccs3	C29517270
C=CCNC(=S)N1CCN(CC1)C(c2ccc(cc2)F)c3ccc(cc3)F	C33919259
CCN(CC)c1ncc(s1)CNCc2cc(ccc2F)Br	C41069305
CN(CC(=O)NCc1cccs1)c2ccc(cc2Cl)Br	C49000729
CCCCOCCNC(=O)c1cc(c(s1)Br)Br	C49403045
C[C@@H](C(=O)NCc1cc(sc1)Br)Oc2ccc(cc2)Cl	C49475833
Cc1cc(c(c(c1)C)NC(=S)N(C[C@H]2CCC=CC2)C[C@H]3CCCO3)C	C06370295
Cc1cn(cn1)S(=O)(=O)c2ccc(cc2Cl)Cl	C01515951
C[C@H]1CCCCN1C(=O)[C@H]2CC(=O)N(C2)C3CCCC3	C08234507
c1ccc2c(c1)cnn(c2=O)Cc3ccc(nc3)Cl	C19386881
Cc1ccc(cc1)S(=O)(=O)n2ccc3c2C(=O)[C@@H](C3)C	C26897216
Cc1nc(n(n1)c2cc(c3ccccc3n2)CCl)C	C41634231
Cc1cc2c(n1Cc3cnn(c3)C)CC(CC2=O)(C)C	C41708445
C[C@@H]1c2ccsc2CCN1S(=O)(=O)N3CCCCC3	C42676094
CN(c1cccc2c1cccc2)C(=O)[C@@H]3COCCO3	C48944958
Cc1csc(=O)n1Cc2nc3c(ccs3)c(n2)Cl	C50840629
Cc1cc(nc(n1)Cl)n2c(c(c(n2)C)Br)C	C52815144
c1ccc(cc1)C2(CC2)c3nnc4n3cnc(c4)Cl	C61618300
Cc1cn(c2c1cccc2)CC(=O)N3C[C@H](OC[C@@H]3C)C	C50312139
c1ccc(cc1)c2cnn3c2nccc3c4ccccn4	C67630425
CCC(=O)Nc1c2c(nn1C(C)(C)C)CS(=O)(=O)C2	C04088594
Cc1c(c(n(n1)C)C)C(=O)NCc2ccc3c(c2)OCO3	C27982846
Cc1c2c(ccc(n2)NC(=O)c3c(nc(s3)C)C)n(n1)C	C40818212
C[C@@H]1COCCN1Cc2c([nH+]nn2c3ccccc3)[O-]	C48961361
c1c(cc2c3c1CCN3C(=O)C2)C(=O)N[C@@H]4CCS(=O)(=O)C4	C49659519
c1c(c(cc(c1F)F)[N+](=O)[O-])C(=O)N2CCC[C@@H]2CO	C50017186
Cn1cc(cn1)NC(=O)[C@@H]2CC(=O)OC23CCCCC3	C57355699
[H]/N=C/1\C=C([C@@H](S1)c2nc(no2)CS(=O)(=O)C)C	C52788428
Cc1c(c(n(n1)C)C)[C@H](C)NC(=O)c2ccc(=O)n(c2)C	C67303604
Cc1c2c(nc(n(c2=O)C)C)sc1C(=O)NC3CCCCC3	C00221680
CC1(Cc2c(cnc(n2)NC(=O)c3cccs3)C(=O)C1)C	C00542438
c1cc2c(cc1Br)sc(n2)NC(=O)c3ccno3	C09625015
Cc1ccc2cccc(c2n1)NC(=O)c3ccc4c(c3)OCO4	C13324234
c1ccc(c(c1)[C@@H]2[C@H]3CC=C[C@@H]3c4cccc(c4N2)C#N)[N+](=O)[O-]	C14477980
c1ccc(c(c1)[C@@H]2C[C@H](Nc3n2nnn3)c4cccs4)F	C15866301
Cc1c2c(nc(n1)c3ccccc3)Sc4c(nc[nH]c4=O)C2	C34788806
CC(=O)/[NH+]=C/1\C=CC2=N[C@@H]([N-]C2=C1)c3ccc(o3)Br	C38966284
Cc1c(c(on1)C)NC(=O)c2cc3c(n2C)cccc3Cl	C40788853
CN1[C@@H](C2=C(N=N[C@H]2C1=O)c3ccc(cc3)F)c4ccc(cc4)O	C06747812
C#CCNC(=O)c1cc(cn1C2CC2)Br	C36860073
c1ccc(c(c1)C(=O)NCc2nccs2)Br	C40437371
C[C@H]1COCCN1Cc2c(ccs2)C#CCCO	C43679660
Cc1cccc(=O)n1Cc2c(ccs2)C#CCCO	C43682349
Cn1cc(cn1)SCc2ccc(s2)C#CCO	C43683426
CC(=C)CSc1c2c(c3c4c(c(nc3s2)c5ccccc5)CCCC4)ncn1	C02268992
c1ccc(cc1)c2csc(n2)N3[C@H](CC(=N3)c4ccccc4)c5ccc(cc5)Cl	C05243899
CC(C)CSc1c2c(c3c4c(c(nc3s2)c5ccccc5)CCCC4)ncn1	C08658498
Cc1ccc(cc1)c2c(sc(n2)/N=C/c3cccc4c3cccc4)c5ccccc5	C19894551
Cc1ccc2c(c1)c3c(cn2)c(nn3c4cc(ccc4Cl)Cl)c5ccc(cc5)Cl	C09676076
Cc1ccc(cc1)Cn2c3c(c(n2)C)c(cc(n3)c4ccc(c(c4)Cl)Cl)C(F)F	C20615359
Cc1ccc(cc1)c2csc(n2)/C(=C/c3ccc(o3)c4cccc(c4Cl)Cl)/C#N	C33568130
c1ccn2c(c1)nc(c2/N=C\c3cc(ccc3Cl)Cl)c4ccc(cc4Cl)Cl	C20072009
C[C@@H](c1ccc(cc1)CC(C)C)c2nc3ccccc3n2C[C@H]4CC4(Cl)Cl	C38810655
CC(C)(C)c1cn2c3ccccc3n(c2n1)C	C00228269
CC(C)[C@H](n1nc2ccccc2n1)Cl	C05285123
Cc1ccc2c(c1)cc3c(n2)N(CC3)C(=O)C(C)(C)C	C15841834
Cc1cc(c(c(c1)[N+](=O)[O-])Br)C	C22014124
Cc1c(sc2c1c(nc(n2)c3ccco3)Cl)C	C54444788
Cc1ccc(cc1)Cn2cnc3c(c2=O)nnn3c4ccccc4	C04266709
Cn1c2c(c(=O)n(c(=O)n2C)C)nc1SC3CCCCC3	C01593074
Cc1c(sc2c1c3nc(nn3cn2)c4c(c(nn4C)C)Cl)C	C02808127
c1cc(cnc1)c2nnc(o2)Sc3c4ccsc4ncn3	C08199276
Cn1c(nnc1Sc2c3ccsc3ncn2)c4ccco4	C08746133
CC(C)c1ccc(cc1)Cn2cnc3c2c(=O)n(c(=O)n3C)C	C05263233
CCc1nc(on1)CN2c3cccc4c3c(ccc4)S2(=O)=O	C29137807
Cc1c2c(c(nc(n2)C)N3CCN(CC3)c4cccc(c4)Cl)n(n1)C	C32650651
C[C@@H]1CCC[C@@H](C1)Sc2nc(nc(n2)Cl)n3cncn3	C61558781
Cc1ccc(cc1F)c2nc(no2)c3ccc4nnc(n4c3)C	C65241221
Cn\1ccs/c1=N\C(=O)c2cnc3ccc(cn3c2=O)Br	C55189182
Cc1nc2c(c3c(n2Cc4ccc5c(c4)OCO5)nc6ccccc6n3)c(=O)n1C[C@@H]7CCCO7	C02247754
c1cc(ccc1CSC2=N[C@@H]3CS(=O)(=O)C[C@@H]3N2c4ccc5c(c4)OCO5)[N+](=O)[O-]	C08741139
Cn1c2c(c(=O)n(c1=O)C)n3cc(n(c3n2)c4ccc(cc4)OC)c5ccc(c(c5)Cl)OC	C09013302
Cn\1c2ccc(cc2s/c1=N\C(=O)[C@@H]3CCCN3S(=O)(=O)c4cccs4)[N+](=O)[O-]	C12464899
CCn1c2ccc(cc2nc1Sc3ccc(cn3)[N+](=O)[O-])S(=O)(=O)N4CCCCC4	C12525229
Cc1c2c(c(nc(n2)C(C)C)N3CCN(CC3)C(=O)/C=C/c4ccc5c(c4)OCO5)n(n1)C	C28557761
COc1ccccc1n2c(nnc2SCC(=O)N3CCC4(CC3)OCCO4)c5ccco5	C35139028
CN(C)c1c2c(nc(n1)c3ccccc3)CCN(C2)S(=O)(=O)c4ccc(c(c4)[N+](=O)[O-])Cl	C35454855
Cc1ccc(cc1)S(=O)(=O)n2c(cc3c2ccc(c3)[N+](=O)[O-])C	C00116160
c1ccc2c(c1)nc(c(n2)Cl)Sc3nnc(o3)c4ccncc4	C09145908
Cc1ccc(cc1)c2nnc(o2)c3c(n(nn3)c4ccccc4)C	C12274025
Cn1cnc(c1Oc2ccc3ccccc3c2Br)[N+](=O)[O-]	C08318131
Cc1cccc(c1)n2c(nnn2)Sc3c4ccsc4ncn3	C14141547
c1ccc(cc1)Cc2nc3c4cnn(c4ncn3n2)c5ccccc5F	C06810150
CCn1ccc2c(c1=O)nnc3n2nc(c3c4ccc(cc4)F)C	C40391836
Cc1nnc2n1cc(cc2)c3nc(on3)Cc4ccccc4Cl	C65241210
Cc1cccc(c1)Cn2c3c(nc2SC)n(c(=O)n(c3=O)C)C	C00257775
C[C@H](Cn1c2c(nc1Br)n(c(=O)n(c2=O)C)C)CCl	C04314858
c1cc2c(cc1c3cnc(o3)Cn4cc(cn4)Br)OCCO2	C41367593
CC(C)n1cc2cc(sc2c1)C(=O)N3CCN(CC3)c4ncccn4	C65285404
Cc1ccc2c(cc(=O)oc2c1C)CSc3nc4nc(cc(n4n3)C)C	C03467092
Cn1c(cc(n1)c2nc3c4c5c(sc4ncn3n2)CCCC5)C(F)(F)F	C02787686
c1ccc(c(c1)Cn2cnc3c(c2=O)cc(cc3Cl)Cl)[N+](=O)[O-]	C02544870
CC(C)Oc1cccc(c1)c2nc3c4c5c(sc4ncn3n2)CN(CC5)C	C20548903
Cc1ccccc1C2=NN=C3[C@H]2CN(CC3)Cc4cccc5c4non5	C39485546
Cc1nc(co1)c2nn3c(nnc3s2)c4cccc(c4Cl)Cl	C44891819
c1ccc2c(c1)nc3n2[C@H](N=N3)SCc4cc(cc5c4OCOC5)F	C40002935
Cc1ccc(cc1)c2ccc(o2)C=C3C(=O)N(C(=O)N(C3=O)C)C	C04103802
Cc1cc(n(c(=O)c1)/N=C/c2ccc(c(c2)[N+](=O)[O-])Cl)C	C00492178
Cc1c2c(cc(nc2on1)C3CC3)C(=O)N4CCO[C@@H]5[C@@H]4CCCC5	C40553860
c1cc(ncc1Br)N2CCN(CC2)C(=O)c3cnns3	C47832698
c1c(c(c(=O)n(n1)CC(=O)N2CCO[C@H]3[C@H]2CCCC3)Cl)Cl	C53364556
C1CCC(CC1)[C@H]2CCCN2C(=O)C3=CN4CCS(=O)(=O)N=C4C=C3	C55599657
Cc1cnc(s1)n2c(c(nn2)C(=O)N3CCc4c3cccc4)C	C56933040
c1cc(cc(c1)Br)[C@H]2CC(=Nc3n2nnn3)c4cccnc4	C06920136
C[C@H]1C[C@@H](N(c2n1ncc2)C(=O)c3cccc4c3OCCO4)C	C67055294
c1cc(ccc1c2nn(c(=O)o2)Cc3cn4cc(ccc4n3)Cl)F	C10423200
c1ccc(cc1)N2CCN(CC2)c3c4c(ncn3)n5c(n4)CCCCC5	C06899576
c1ccc2c(c1)c3c(o2)c(=O)n(cn3)Cc4cc(cc5c4OCOC5)Cl	C07007058
Cc1nc2c3ccccc3nc(n2n1)N4C[C@H](O[C@@H](C4)c5ccccc5)C	C66465001
Cc1nc2c(cccc2s1)NC(=O)c3ccccc3Cl	C03163684
c1ccc2c(c1)cc(s2)C(=O)Nc3nc4c(s3)CCC4	C12852454
Cc1cccc(n1)NC(=O)c2cc3c(s2)CCCCCC3	C12537857
C[C@H]1CCC[C@@]2(C1)CS/C(=N\c3ccc(cc3)CC#N)/N2	C53101507
c1ccc(c(c1)[C@@H](c2cc3c(cc2Cl)OCCCO3)O)Cl	C40259671
Cc1cc(nc(c1NC(=O)c2ccccc2Br)C)C	C58171608
CSc1cccc(c1)NC(=S)N(CC[NH+]2CCCCCC2)Cc3cccs3	C03665715
c1ccc2c(c1)CC[NH+](C2)CCNC(=O)c3cc(nc4c3cccc4)c5cccs5	C04881643
c1ccc(cc1)COc2c(cc(cc2Br)C[NH2+]C[C@@H]3CCCO3)Br	C10474490
Cc1cccc(c1)c2ncc(cn2)C[NH+]3CCC[C@@](C3)(Cc4ccc(cc4F)F)CO	C11816408
C[NH+](C)Cc1ccc(cc1)c2ccccc2CNC(=O)c3ccccc3Br	C25521302
CCOc1c(cc(cc1Br)Br)C[NH2+]CCN2CCCC2	C34993526
CCOc1cc(cc(c1OCC(=C)Br)Br)C[NH2+]C2CC2	C37712207
c1cc(c(c(c1)Cl)CSCCNC(=O)[C@@H]2CCC[NH+](C2)Cc3ccc(cc3)F)Cl	C38853189
c1cc(c(c(c1)Cl)COc2ccc(cc2C[NH2+]Cc3ccco3)Br)F	C40739706
c1ccnc(c1)C[NH2+]Cc2cc(ccc2OCc3ccc(c(c3)Cl)Cl)Cl	C40743479
C[C@H](CNC(=O)c1cc(c(s1)Br)Br)C[NH+]2CCCC2	C49092297
Cc1ccc(cc1)SC2=c3ccc(cc3=[NH+][C@H]2C(=O)NCc4ccccc4F)OC	C63531321
C[C@@H]1CCc2c(sc3c2c(ncn3)SCC#N)C1	C01778576
c1c(cc(c2c1c(c(c(=O)o2)C=O)Cl)Cl)Cl	C02583693
c1cc(sc1)C(=O)c2cc3c(cc2Cl)OCCO3	C35369562
Cc1cc2nc(c(n2cc1Br)C#N)C(C)C	C36244733
COc1ccc(cc1)c2cn3c4c(sc3n2)CCCC4	C00382808
CCc1c(nn(c1C)c2ccc(cn2)Br)C	C42388773
c1ccc2c(c1)nc(s2)Sc3c(nccn3)Cl	C43538439
Cc1cccc(c1)N(C)c2nc3c(s2)C(=O)CCC3	C54862961
CSc1c2cc(nn2ccn1)c3cccc(c3)Cl	C57510819
Cc1ccc(cc1Br)c2nnc(o2)C(C)C	C62152497
c1ccc2c(c1)cc3c(n2)c4cccc5c4n(c3=O)CCC5	C03956990
Cc1ccc2nc(c(n2c1)[C@H](C)Cl)c3cccnc3	C31921049
Cc1ccc2c3c1nc(cc3N(C=N2)c4ccccc4)C	C00435522
Cc1c(nc2n1nc(s2)C(C)C)c3ccc(cc3)F	C40963575
C[C@@H]1C[C@@H]1c2ccc(o2)c3nc4c(s3)C(=O)CCC4	C50329746
c1cc2c(cc1Cl)nc(o2)S[C@H]3CCCCC3=O	C59133786
Cc1c(c2cc(ccc2[nH]1)Br)CC(=O)N(C)C	C32914280
C[C@H](C(=O)N(C)C)Nc1c(c(c(c(c1F)F)F)F)F	C49099964
c1ccc(c(c1)O)SCC(=O)N2CCc3c(ccs3)C2	C50046479
c1ccc(c(c1)NCc2ccncn2)I	C54788895
Cc1csc(n1)NC(=O)c2c(cccc2Cl)Cl	C02767758
Cc1cnc(s1)NC(=O)c2ccc(cc2F)Br	C08775876
Cc1cccc(n1)NC(=O)c2cc(cs2)Br	C13746162
Cc1cc(c2c(c1)sc(n2)NC(=O)[C@H](C)SC)C	C31665314
Cc1c(sc2c1c(=O)n(c(=S)[nH]2)[C@@H]3CCC[C@H](C3)C)C	C35698616
C[C@H]1CN(Cc2c1cccc2)CC(=O)c3ccccc3O	C36372532
Cc1ccc(o1)/C=C\2/C(=O)N(C(=S)S2)[C@@H](C)C(=O)[O-]	C01803624
c1ccc2c(c1)C[C@@H](N2C(=O)c3ccccc3F)C(=O)[O-]	C19965486
CC[C@@H](C)n1cc(c(=O)c2c1c(cc(c2)F)F)C(=O)[O-]	C62671572
Cn1cc(c(=O)c2c1cc(c(c2)OC)Cl)C(=O)[O-]	C64874642
c1ccc2c(c1)CCC[C@@H]2NC(=O)COc3ccc(cc3)C4SCCCS4	C05279079
Cc1ccc(s1)C(=O)CCC(=O)N[C@H](C)c2ccccc2Br	C21914065
COCc1ccccc1CNC(=O)c2ccc(cc2)I	C25303954
Cc1c(nc(s1)Cc2cccc(c2)Cl)c3ccc(s3)CNC(=O)C	C40086292
CC(C)C(=O)NC[C@@H](c1ccc(cc1)SC)N2CCc3c(ccs3)C2	C40108570
c1ccc(cc1)SCCNS(=O)(=O)c2ccc(cc2Br)F	C40436520
C=CC[C@@H](c1ccccc1I)S(=O)(=O)NCC=C	C43214726
c1ccc(c(c1)C[S@](=O)CC(=O)Nc2cccc(c2Cl)Cl)Cl	C66300748
C[C@H]1CC[C@@H]2[C@@H](C1)NN(C2(C)C)c3ccccc3	C04614330
c1ccc(cc1)/[NH+]=C/c2c(c3ccccc3s2)[O-]	C18066732
C[C@H](c1ccc(c(c1)Cl)N2CCc3c2cccc3)O	C61694913
c1ccc2c(c1)cc(o2)C(=O)Nc3nnc(s3)[C@H]4CCCO4	C00150296
C1CC[C@H]2[C@@H](C1)CCCN2C(=O)CN3C(=O)C4(CCCC4)NC3=O	C08727854
Cc1cc(c(c(c1)C)N2C(=O)/C(=C/c3ccoc3)/C(=O)NC2=O)C	C00097415
CCc1nnc(s1)NC(=O)c2cc(=O)c3cccc(c3o2)C	C21807431
Cn1c2ccccc2n(c1=O)CC(=O)Nc3ccc(cn3)Cl	C26089417
CCn1cc(c(n1)C(=O)Nc2nc(cc(n2)C)C)Br	C27971443
C[C@H](c1ccc(cc1)Br)Nc2cncc3n2nnn3	C44347154
Cc1cc(no1)NC(=O)C2CN(C2)c3nc4ccccc4s3	C62023104
CC1=NC(=NC(=O)[C@H]1CC(=O)Nc2nc3ccccc3s2)C	C64085697
Cc1nc2cc(ccc2o1)C3=NO[C@H](N3)C4=CC=C[C@H]5C4=CC=N5	C65149636
CC[C@@H]1CCc2c(sc(c2C(=O)OCC)NC(=O)[C@H](CC)Oc3ccc(c(c3)C)C)C1	C02783306
C=CCc1ccccc1OCCn2cc(c3c2cccc3)/C=N/Nc4nc5ccccc5s4	C09424640
c1ccc(cc1)COc2ccc(cc2)C(=O)N/N=C/c3ccccc3OCc4ccccc4	C14027711
CCCCCCN1CC(=O)N2[C@@H](C1=O)Cc3c4ccccc4[nH]c3[C@@H]2c5ccc(cc5)C(C)C	C16042701
CCCCCCN1CC(=O)N2[C@@H](C1=O)Cc3c4ccccc4[nH]c3[C@H]2c5ccc(cc5)C(C)C	C16042702
CCCCOc1ccc(cc1)C(=O)Nc2nnc(s2)SCc3cccc4c3cccc4	C33432595
Cc1ccccc1C(=O)N[C@H](C)c2nc3ccccc3n2CCCOc4ccc(cc4)C(C)C	C40186536
Cc1ccccc1CC(=O)N[C@@H](C)c2nc3ccccc3n2CCOc4ccc(cc4)C(C)C	C40195705
Cc1ccc(c(c1)C)C(=O)NCCc2nc3ccccc3n2CCOc4ccc(cc4)C(C)C	C40199981
CCCCN1[C@@H](c2c(n[nH]c2C1=O)c3ccc(cc3)Cl)c4cccc(c4)OCCCC	C40343409
C[C@@H](CNC(=O)C1CCN(CC1)c2ccc(nn2)c3ccc(cc3)C(C)C)c4ccccc4	C40926190
CCOc1cc(ccc1OCc2ccccc2)/C=C/3\C(=O)N/C(=N\c4ccc(c(c4)C)C)/S3	C59223946
Cc1ccc(cc1)/C=C(/c2nc3ccccc3s2)\Oc4ccccc4	C03849563
c1ccc2c(c1)cccc2Cn3c4ccccc4nc3Cc5cccs5	C08787008
CC[C@H](C)c1ccc(c(c1)Br)OC(=O)c2cccs2	C09230219
c1ccc(cc1)CSc2nc3c(c4c(s3)CCC4)c(n2)Cl	C24546111
c1cc(c(c(c1)Cl)/C=N\N=C/c2c(cccc2Cl)Cl)Cl	C25668193
c1cc(c(cc1Cl)Cl)c2ccc(o2)C(=S)N3CCCCC3	C00189860
CCc1cccc(c1NC(=O)[C@H]2C[C@H]3CC[C@@H]2C3)C	C06125540
CC[C@@H]1C[C@@H]2CCC[C@@](C2)(C1)NC(=O)[C@@H](C)Cl	C06541179
c1ccc(c(c1)CNc2cccc3c2ccnc3)F	C35038534
Cc1ccc(c(c1)F)NCc2ccc3c(c2)CCO3	C37362959
CC(C)CCc1nc2c(s1)[C@H](CC(C2)(C)C)O	C50335846
Cc1ccc2cccc(c2n1)NC[C@@H]3CCC=CC3	C61874925
CCc1ccc(cc1)[C@H](c2ccc3c(c2)COC3)O	C62334982
CCCc1cc2c(c(cc(c2F)F)F)nc1NC	C63118714
c1ccc(cc1)c2[nH+]c(nn2c3ccccc3)[S-]	C04558066
CC(C)[C@H]1CC[C@]2([C@@H](O2)CC[C@@]3([C@@H]([C@@H]1O)O3)C)C	C35458706
Cc1ccc(c(c1)C)c2cn3ccc(cc3n2)CO	C36274057
c1cc(c(cc1c2ncc(s2)C=O)Cl)O	C43477141
c1cnc(c(n1)NC2CCCCCC2)Cl	C43537643
Cc1cc(c(c(c1)C)c2[nH]c3cccnc3n2)C	C44264996
Cc1c(nc(nc1NC)c2ccc(cc2)F)C	C50864065
C1CCc2c(c(nc(n2)NC3CC3)Cl)C1	C57345733
CC[C@H]1CCc2c(c3ccccc3nc2O1)O	C08684239
c1ccc(cc1)n2cccc2/C=C(\C#N)/C(=O)Nc3cccc(c3)Br	C04083809
Cc1ccc(cc1)n2c(c3c(n2)CSC3)NC(=O)C45CC6CC(C4)CC(C6)C5	C04176202
c1ccc(cc1)C#Cc2ccc(cc2)C(=O)Nc3nnc(s3)c4ccccc4	C16470495
c1cc(c(c(c1)Cl)Cl)C(=O)Nc2nc(cs2)c3ccc4c(c3)CCO4	C22192170
CC[C@@H]1c2ccsc2CCN1C(=O)CNC(=O)C34CC5CC(C3)CC(C5)C4	C58257453
Cc1ccc(s1)[C@H](C)NC(=O)C2CCN(CC2)c3nc4ccccc4s3	C66333032
CSc1c2c(nc(n1)Cl)n(c(n2)SC)c3ccccc3	C01668440
c1ccc(cc1)c2cc(no2)Cn3cc(ccc3=O)Br	C21585749
c1cc(nnc1SCc2cc3c(c(c2)Cl)OCCO3)Cl	C26424428
c1ccc(c(c1)OC(=O)c2cnns2)I	C48762350
Cc1ccc(c(c1)S(=O)(=O)N2CCn3c4ccccc4cc3C2)C	C62616737
Cc1cc(on1)[C@H]2CCCN2C(=O)C[C@@H]3C[C@@H](CC(C3)(C)C)C	C66615270
Cc1ccc(c2c1N(CCC2)C(=O)[C@H](C)c3c(nn(c3C)C)C)F	C66787266
c1ccc2c(c1)c(c[nH]2)[C@H]3[C@H]4CC=C[C@@H]4c5cccc(c5N3)Br	C14544808
c1cc(cc(c1)Br)n2c(cc(n2)c3ccc(cc3)Br)N	C35778818
c1cc(ccc1c2c(noc2N)c3ccc(cc3)Br)Br	C36936700
Cc1ccc(cc1I)N[C@@H]2C[C@@H](c3c2c(ccc3C)O)C	C37056129
c1cc(c(cc1F)Br)Oc2c(cc3c(n2)CCC3)C(=S)N	C43409165
c1ccc2c(c1)CC[C@H]2NC(=O)Nc3cccc(c3)C4SCCCS4	C43833937
c1ccc2c(c1)cc3ccccc3c2[C@H]4Nc5c(c6c(s5)CCCC6)C(=O)N4	C02052831
Cc1ccc(c(c1O)C)NCc2cc(c(o2)Br)Br	C50360501
Cc1c(nc(s1)[C@H](c2ccc(cc2)C(C)(C)C)N)c3ccccc3	C58432482
COC(=O)c1c(c(cs1)I)I	C04088416
CCCC(=O)Oc1c(cc(cc1Br)Br)Br	C01597234
c1ccc(c(c1)CSC2=N/C(=C\c3ccc(o3)Br)/C(=O)S2)Cl	C08397921
c1cc2c(cc1I)c3cc(ccc3n2CCC#N)I	C09444131
c1cc(c(cc1Br)C=O)OCc2cc(ccc2F)Br	C20482880
CC[C@@H]1c2ccsc2CCN1C(=O)CC34C[C@H]5C[C@@H](C3)CC(C5)(C4)Br	C32781337
CCO[C@H]1CC[C@]2(C1)C[C@@H](CN2I)I	C39507449
c1ccc(c(c1)CN2c3ccccc3[C@](C2=O)(CC(=O)c4ccc(s4)Cl)O)Cl	C01064803
CCN(c1ccccc1)C(=O)c2cccc3c2N[C@@H]([C@H]4[C@@H]3C=CC4)c5ccc(cc5)N(C)C	C13644970
CCCn1cc(c2c1ccc(c2)Br)C[C@@H](C)NC(=O)[C@H]3CCOC(C3)(C)C	C16888870
CCN(c1ccccc1)C(=O)c2cccc3c2N[C@@H]([C@H]4[C@H]3C=CC4)c5ccccc5OCC	C20748897
CN1CCc2c(sc(c2c3nc4ccccc4s3)NC(=O)Cc5cccs5)C1	C22673983
C[C@H](c1ccc2ccccc2c1)NC(=O)CSc3nn(c(=S)s3)c4ccccc4	C25210075
Cc1cc(ccc1Br)n2c(cc(c2C)/C=C(\C#N)/C(=O)NCc3ccccc3)C	C59533842
CN(CCCNC(=O)c1ccc(cc1Cl)Cl)C(=O)c2ccc(cc2Cl)Cl	C19074961
c1ccc(cc1)c2cn(cn2)C[C@H](COc3ccc4ccccc4c3Br)O	C08670825
C[C@H]1CN(C[C@@H](O1)C)Cc2ccc(cc2)CNC(=O)c3c(c4ccccc4s3)Cl	C46793391
Cc1c(c(c(n1c2ccccc2)C)Br)/C=N/NC(=O)CSc3ccccc3	C20243683
c1cc2cccnc2c(c1)SCC(=O)Nc3nc(cs3)c4ccc(cc4)Br	C58948215
C[C@H]1CN(C[C@@H](O1)C)Cc2ccccc2CNC(=O)c3c(c4ccccc4s3)Cl	C59058835
c1cc(c(cc1F)Br)OCC(=O)Nc2cc(ccc2N3CCSCC3)Cl	C65575645
CC(C)(C)NS(=O)(=O)c1ccc2c(c1)[C@@H]3C=CC[C@@H]3[C@@H](N2)c4cccc(c4Cl)Cl	C14476997
Cc1ccc(cc1C)NS(=O)(=O)c2ccc3c(c2)[C@@H]4C=CC[C@@H]4[C@@H](N3)c5ccc(cc5)SC	C14551721
C[C@@H]1CCc2c(sc(c2C(=O)NC3CC3)NC(=O)c4c(c5c(cccc5s4)F)Cl)C1	C20562936
c1ccc2c(c1)N[C@@H](C3=C(N2)C[C@@H](CC3=O)c4cccs4)c5ccc(cc5)Br	C21222758
c1ccc2c(c1)N[C@@H](C3=C(N2)C[C@H](CC3=O)c4cccs4)c5ccc(c(c5)Br)F	C21238419
c1ccc(cc1)COc2ccc(cc2)[C@@H]3[C@H]4CC=C[C@@H]4c5cccc(c5N3)C(=O)NC6CCCCC6	C14469849
c1ccc(cc1)c2ccc(o2)/C=C/C(=O)NC(=S)Nc3c(cc(cc3Cl)Cl)Cl	C57315771
c1ccc(cc1)c2c(n3ccsc3n2)[C@@](c4nc5ccccc5s4)(C(F)(F)F)O	C09367004
Cc1c(scn1)CCC(=O)N2CCc3c4ccccc4[nH]c3[C@@H]2c5ccccc5F	C12058055
c1ccc(cc1)n2c(=O)c(c(cn2)NCCc3ccc(s3)Br)Cl	C14808929
c1ccc(c(c1)Nc2ncc3c(n2)CCN(C3)Cc4cccc(c4)Br)F	C21639639
Cc1c(sc2c1c(=O)[nH]c(n2)CSc3ccc4ccccc4n3)C	C05627000
c1cc(c(cc1Cl)c2csc(n2)NC(=O)[C@H]3CCCO3)Cl	C10100602
c1ccc2c(c1)c(c(s2)C(=O)NCc3cn4ccccc4n3)Cl	C28833820
c1ccc(cc1)c2cnoc2NC(=O)c3ccccc3Br	C49735580
CC[C@H]1CCc2c(sc3c2c(=O)[nH]c(n3)Cc4csc(n4)C)C1	C55494500
Cc1cc(ccc1c2ccc(o2)/C=C(\C#N)/C(=O)NC)Br	C58832805
c1ccc(cc1)[C@H]2c3ccsc3CCN2C(=O)NC[C@@H]4CCCO4	C65517996
Cc1c(c(cs1)C(=O)NCc2ccccn2)c3ccccc3	C04748830
Cc1ccsc1CNS(=O)(=O)c2cc(sc2C)C	C28324679
c1cc(sc1/C=C/C(=O)N2CCC(CC2)CO)Br	C37896518
c1ccc(c(c1)C(=O)NC[C@@H]2CCOC2)I	C41375858
CC(C)(c1ccncc1)NC(=O)c2ccccc2CBr	C41691920
c1cc(oc1)[C@H]2C[C@@H]2C(=O)NCc3cc(cs3)Br	C49399862
c1cc(oc1)[C@H]2C[C@H]2C(=O)NCc3cc(sc3)Br	C49467150
c1cc(nc(c1)Cl)C(=O)N[C@@H]2CCSc3c2cc(cc3)Cl	C51073517
Cc1c(c(n(n1)Cc2ccc(cc2F)Br)C)[C@H](C)O	C54723268
CC(C)(C)C(=O)OC1=C(N(S(=O)(=O)c2c1cccc2)C)C(=O)c3ccccc3	C04222985
Cc1c(c(n(n1)CC(C)C)Cl)/C=C/C(=O)c2c(nn3c2n(c4c3cccc4)C)C	C08337822
c1ccc(cc1)c2nc(on2)CCC(=O)N3CCCC[C@H]3c4nc5ccccc5s4	C12766130
C[C@H](c1cccc(c1)[N+](=O)[O-])N(C)S(=O)(=O)c2cccc(c2Cl)Cl	C16733965
CC(C)CCSc1nc2nc3c(cn2n1)C(=O)C[C@H](C3)c4ccc(cc4)OC	C20671673
CCc1ccc(cc1)S(=O)(=O)/N=C/2\N(C(=O)/C(=C\N(C)C)/S2)c3ccccc3	C33938318
Cc1ccc(cc1)c2nc(on2)CSc3nncn3c4cccc(c4)Cl	C36633666
Cc1cc(no1)Cn2cnc(c2c3nc4ccccc4n3CC=C)c5ccccc5	C65430018
c1ccc(cc1)c2nnc(n2Cc3ccc4c(c3)OCO4)S[C@H]5CCCCC5=O	C04365760
CC(C)CSc1nc2c(n1Cc3ccc(cc3)Cl)c(=O)n(c(=O)n2C)C	C00634897
CC[C@H](C)N1C(=O)/C(=C/c2ccc(o2)c3cccc(c3)[N+](=O)[O-])/SC1=S	C01165107
Cc1ccc(c(c1)C)n2c(nnn2)SCC(=O)N(C)[C@H]3CCCc4c3cccc4	C07590766
Cc1cccc(c1)n2c(nnc2SCc3nc(on3)c4ccc(cc4)Cl)C	C12538024
Cc1cccc(c1C)N2CCN(CC2)[C@@H](c3ccc(cc3)F)c4nnnn4C(C)C	C35290680
Cc1cc(nn1c2cccc(c2)Cl)c3c(nc4c(cccn4c3=O)OCC=C)C	C35562821
Cc1nc(on1)CSc2nnc(n2C)c3cc4c(s3)CC[C@H](C4)C(C)(C)C	C36692749
Cc1cc(c(n1c2cc(on2)C)C)C(=O)CSc3nc4cc(ccc4n3C)Cl	C46882582
COc1ccc(cc1)n2ccc(n2)C(=O)N3CCCc4c3c(ccc4)OC(F)F	C57363147
CN(C(=O)/C=C/c1cccc(c1)[N+](=O)[O-])[C@@]2(CCCCC2=O)c3ccccc3Cl	C57684220
Cc1c(cco1)c2nnc(o2)SCc3c(nc4n3cccc4)c5ccccc5	C58927554
Cc1ccc(cc1)CN(Cc2cccnc2)C(=S)Nc3ccc(c(c3)Cl)C	C03662345
Cc1ccc(cc1)CN(Cc2cccnc2)C(=S)Nc3ccc(c(c3)C)Cl	C03662396
c1ccc(cc1)CO[C@@](C#Cc2ccccc2)(c3ccc[nH]c3=O)C(F)(F)F	C05974554
COc1ccccc1CC(=O)NC[C@@H]2CC3c4ccccc4C2c5c3cccc5	C22527221
Cc1ncc(s1)CNc2cc(cc(c2OC(F)F)Br)Cl	C37797314
c1cc(sc1)CN(C[C@@H]2CCCO2)C(=S)Nc3ccc(c(c3)Cl)F	C18165707
C[C@H](C(=O)NCc1ccc(cc1)COC)Sc2cc(ccc2Cl)Cl	C59403218
c1ccc(c(c1)F)SCC(=O)Nc2cccc(c2)CSc3ccccn3	C60245471
CSc1ccc(cc1)CNC(=O)Cc2csc(n2)Cc3ccc(cc3)F	C65559030
Cc1ccccc1NC(=O)[C@@H](C)OC(=O)c2c(cnc(n2)SC)Cl	C11573585
CCCCS(=O)(=O)Nc1cc(nn1c2cc(c3ccccc3n2)C)C	C12251407
Cc1c(c(n2c(n1)ncn2)C)CCC(=O)N[C@@H](C)c3ccc(cc3)C(C)C	C31249605
C[C@H](c1nnc(o1)c2ccccc2)Sc3nnc(s3)NC(C)(C)C	C32841168
CC(C)(C)NC(=O)N(Cc1ccco1)Cc2cc(on2)c3cccs3	C36012663
Cc1ccccc1NC(=O)[C@H](C)Sc2nnc(n2C(C)C)c3ccco3	C39755833
C[C@H]1CCCC[C@H]1OCCNC(=O)c2c(cnc(n2)N3CCCCC3)Cl	C40142304
c1ccc(cc1)c2csc(n2)NC(=O)/C=C/c3ccc(o3)c4cc(cc(c4)Cl)Cl	C08832046
Cc1ccc(cc1Cl)n2cc(c3c2ncnc3NCc4ccc(cc4)F)c5ccccc5	C02974956
CCn1c2ccccc2c3c1ccc(c3)[C@H]4[C@H]5CC=C[C@@H]5c6cc(ccc6N4)OC[C@@H]7CCCO7	C13642880
CCCOc1ccc(cc1)[C@H]2CC(=O)NC3=C2C(=O)C[C@H](C3)c4ccc(cc4)C(C)(C)C	C20881581
c1ccc(cc1)CSc2ncc(c(n2)C(=O)Nc3ccc4ccccc4c3)Br	C27663853
Cc1cc(c(c(c1C)c2csc(n2)NC(=O)c3ccc(cc3)C(=O)c4ccccc4)C)C	C33583456
c1ccc(c(c1)CNc2ccc(cc2)Br)c3nnc(o3)c4ccccc4Cl	C08594451
c1cc(c(cc1CSc2nnc(s2)NC(=O)c3cc(ccc3Cl)Cl)Cl)Cl	C39723935
Cc1ccccc1CC(=O)N[C@H](C)c2nc3ccccc3n2Cc4ccc(c(c4)Cl)Cl	C40195632
c1ccc(cc1)NC(=O)c2c(c3cc(ccc3s2)OCc4ccc5ccccc5n4)Cl	C45068871
Cc1ccc(n1c2ccc(cc2)C(=O)N/N=C/c3ccc(cc3Cl)Cl)c4ccccc4	C59304359
c1cc2c(cc1CN\3[C@H]4CS(=O)(=O)C[C@H]4S/C3=N\C(=O)[C@@H]5CCCO5)OCO2	C13557437
CC(=O)N(C(=O)C)N1C(=O)/C(=C/c2cc(ccc2Cl)[N+](=O)[O-])/SC1=S	C15015932
C[C@@H]1CN(C[C@@H](O1)C)C(=O)CSc2nnc3n2nc(cc3)c4ccco4	C38770770
Cn1c2c(c(n1)C(=O)N3CCOCC3)CN(CC2)S(=O)(=O)c4cccc(c4)Cl	C64893449
Cc1nc(cc2n1c(=O)n(n2)CC(=O)N(C)c3ccccc3)c4ccccn4	C65196788
c1cc2c(cc1S(=O)(=O)N3CCCn4c(cc(n4)c5ccncc5)C3)OCCO2	C65225630
c1cc(c2c(c1)OCCO2)[C@@H]3CCCN3C(=O)Cc4ccc(cc4)n5cnnn5	C66770485
C[C@@H](c1ccc2c(c1)OCCO2)OC(=O)C3=CN4CCS(=O)(=O)N=C4C=C3	C66884732
c1csc(n1)[C@H]2CCCN(C2)C(=O)c3cc4c(cc3[N+](=O)[O-])OCCO4	C67046935
Cc1ccc(c(c1)S(=O)(=O)Nc2ccc3c(c2)N(C(=O)C(CO3)(C)C)CCC(C)C)OC	C09174160
Cc1ccc(c(c1)c2csc(n2)NC(=O)CCc3nc(no3)c4ccc(cc4)OC)C	C11811711
Cc1ccc(cc1C)[C@@H](C)NC(=O)COC(=O)c2ccc(c(c2)[N+](=O)[O-])Br	C12016319
CCn1c(nnc1SCC(=O)Nc2nc(cs2)c3ccccc3)c4cc5ccccc5o4	C15019318
Cc1cccc(c1)[C@H]2C(=C(N=C3N2C(=CS3)/C=C(/N4CC[NH+](CC4)C)\[O-])C)C(=O)OCC=C	C35697225
CC(C)CN1c2cc(ccc2OCC(C1=O)(C)C)NC(=O)/C=C/c3ccc(c(c3)OC)OC	C38708122
Cc1ccc(cc1)n2c(nnn2)SCC(=O)Nc3ncc(s3)Cc4ccc(cc4)Cl	C39895084
C[C@@H](CNC(=O)C1CCN(CC1)c2cc(ncn2)n3c(ccn3)c4ccccc4)c5ccccc5	C40854718
c1ccc(cc1)C(c2ccccc2)N3CCN(CC3)c4ccc(cc4[N+](=O)[O-])C(=O)NC5CC5	C28707140
Cc1csc(n1)NC(=O)CSc2nnc(n2Cc3ccccc3)c4cc5ccccc5o4	C20193765
COC1CCC(CC1)/C(=C/[C@@H]2CC[C@H]3[C@@H](C2)OCO3)/C#N	C01735527
Cc1c(c(on1)C(=O)N2C[C@]3(C[C@@H]2CC(C3)(C)C)C)Cl	C05007067
CC1(CC2=C3C(=NC(=NC3=O)c4cccs4)S[C@H]2CO1)C	C38676241
C[C@H]1CCCCN1C(=O)/C=C/c2c(nc3n2ccs3)Cl	C40159696
Cc1cc(n2cc(nc2n1)CSc3nc(cs3)C)C	C48601169
c1cc2c(cc1c3cc(no3)CBr)OCCCO2	C57654421
Cc1ccc(nn1)n2c(c(c(n2)C(F)F)CCl)Cl	C61629205
C1C[C@H](N(C1)C(=O)C2CC2)C(=O)N3CC4C[C@H]5C[C@@H](C4)CC3C5	C65815444
CC1=NC2=C([C@@H](C1C#N)c3cccc(c3)I)C(=O)CCC2	C00728479
c1cc(ccc1CN2C(=O)/C(=C/c3ccc(o3)Br)/SC2=S)F	C01104049
C[C@@H]1Cc2cc(ccc2O1)/C=C\3/C(=O)N(C(=S)S3)[C@@H](C)c4ccccc4	C02329702
Cc1ccc(cc1)S(=O)(=O)N2CCc3ccccc3[C@@H]2[C@@H]4CCSC4	C33811557
c1ccc2c(c1)N(CCS2)S(=O)(=O)c3ccc(s3)Br	C42260069
Cc1cc2=CCCC=c2c3c1O[P@](O[C@H]4C3=c5ccccc5=C[C@@H]4C)N(C)C	C43220916
c1ccc2c(c1)N(CCCS2)C(=O)Cc3csc(n3)c4ccsc4	C57974585
CCN\1c2ccc3c(c2S/C1=C\C=C/4\C(=O)N(C(=S)S4)CC)CCCC3	C27551043
c1ccc2c(c1)CCN(C2)c3c4c5c(sc4ncn3)CCC5	C00390192
c1ccc2c(c1)CCN2C(=O)c3cccc4c3SCCC4=O	C20902334
CC(=O)C1=C(COC(=O)C1)c2ccc(cc2)c3ccccc3	C35683736
c1cc(sc1)c2c(cn(n2)c3ccc(cc3F)F)C=O	C36894363
c1cc(c(nc1)n2ccc(n2)C(F)(F)F)Br	C43298978
Cc1cc(nc(n1)Sc2c(cccn2)Br)C	C51608019
c1c(cc(c(c1F)n2cc(nn2)CCl)Br)F	C52225350
CC(=O)C1=NN([C@@H]2[C@@H]1CC=C2)c3c(cccc3Cl)Cl	C59383892
Cc1nc(cs1)/C=C/C(=O)N2CC3C[C@H]4C[C@@H](C3)CC2C4	C65813816
c1ccc(cc1)OS(=O)(=O)c2c(c(c(c(c2F)F)F)F)F	C01728607
C[C@H]1Cc2cc(ccc2O1)/C=C\3/C(=O)N(C(=S)S3)CC(C)C	C02325733
Cc1ccc(c(c1)OCC(=O)N2CCc3c(ccs3)C2)Cl	C12907919
c1ccc2c(c1)nc(s2)CS(=O)(=O)c3ccc(cc3F)F	C47658564
C/C=C/C=C/C(=O)N1CCO[C@H](C1)c2ccc(cc2)Br	C49035812
c1cc(ccc1n2cc(nn2)CCCl)I	C52225276
c1ccc2c(c1)CCN3[C@@H]2CN(CC3)C(=O)CCc4ccccc4F	C62456279
c1csc(n1)[C@H]2CCCN(C2)C(=O)[C@@H]3CCCC[C@@H]3C(F)(F)F	C67047151
CCC1=NC(N=C2N1C(=CC(=C2)C)C)(C(F)(F)F)C(F)(F)F	C00032767
c1ccc(cc1)c2cn3c4ccccc4sc3c2[C@H](CC#N)C#N	C00386637
CC(C)c1ccc(cc1)c2c(c(=O)c2=O)N3CCc4ccccc4C3	C06893396
Cc1cc(no1)COc2ccc3ccccc3c2Br	C08221770
Cc1csc(n1)N2[C@H](CC(=N2)c3ccccc3)c4cccs4	C09304352
C[C@@H](c1cc2ccccc2o1)N(C)C(=O)[C@@H]3CCCc4c3cccc4	C32760876
C[C@@H](c1nc2cc(ccc2n1c3ccc(cc3)OC)Cl)Cl	C36910380
Cc1c(c(n(n1)C)Cl)COc2ccc(cc2F)Br	C37408816
Cc1cccc(c1)/N=C/c2cc(c(o2)N3CCCC3)Br	C59248167
CC(C)(C)c1ccc(=O)n(n1)Cc2ccc(s2)Br	C66263398
c1ccnc(c1)C(=O)Nc2cccc(c2)I	C03328217
c1ccc(cc1)C(C#CC[N+]2(CCCC2)[O-])(c3ccccc3)O	C02578694
CCCC(=O)Nc1c(cc(cn1)I)C	C06516014
CC(=O)N1CCc2c1ccc(c2)NCc3ccc(s3)Cl	C35042401
C[C@H](c1ccc(cc1)Br)Nc2ccc(=O)n(c2)C	C37785478
Cc1c(sc(n1)C)[C@H](C)Nc2c(cc(cn2)Cl)Cl	C40445482
c1cc(sc1)C(=O)Nc2ccc3c(c2)sc(n3)C4CC4	C49490191
CS(=O)(=O)c1ccc(cc1)c2cc(cc(c2)Br)O	C65343933
CC1(Cc2c(c(nc3c2c4c(s3)c(=O)n(cn4)CC(=O)N5CCCC5)c6ccco6)CO1)C	C09423038
c1cc(oc1)/C=C/2\CCC[C@H]3C2=NN([C@H]3c4ccco4)C(=O)Cn5cnc6c(c5=O)ccs6	C09730392
Cc1csc2n1c(=O)cc(n2)COC(=O)c3c(c4c(s3)nc5n(c4=O)CCCCC5)C	C11064130
Cc1ccccc1c2cc3c(c(c2)O[C@H]4CCOC4)OCCN(C3)S(=O)(=O)c5c(noc5C)C	C12041736
Cc1ccccc1S(=O)(=O)N2CCN(CC2)Cc3cc(=O)n4c(n3)sc(n4)c5cccs5	C41077424
Cc1cc(=O)nc2n1nc(s2)N3CCN(CC3)C(=O)c4c5c(sc4n6cccc6)CCCC5	C45915101
c1cc2c(cc1S(=O)(=O)N3CCN(CC3)C(=O)[C@H]4CCCN(C4)c5ccc(nn5)Cl)CCC2	C46911883
C[C@H](c1ccccn1)[C@H]2CCCC[C@@H]2Br	C38337468
C[C@H]1CC[C@@H]([C@@H](C1)C[C@@H]2CCCO2)Br	C53339121
C[C@H]1CC[C@H]([C@@H](C1)C[C@@H]2CCCO2)Br	C53339125
CCc1ccc(s1)[C@H]([C@@H]2CCCOC2)Cl	C62240555
C[C@@H](c1ccc(cn1)Cl)[C@H](C)Br	C63046034
c1ccn(c1)CCSCc2ccc(cc2)Cl	C02383491
c1cc(c(cc1OCCCCBr)F)F	C36749903
CCCC(=O)CCc1ccc(c(c1)Br)F	C37408500
CC[C@H](C)O[C@H](CBr)c1ccccc1	C02016250
C1CC[C@@H]([C@@H](CC1)Br)OCC(F)(F)F	C50503106
c1ccc(c(c1)C[C@@H](c2ccoc2)Br)F	C62168301
CCc1ccc(cc1)[C@@H](c2cscn2)Cl	C62360324
c1ccc(cc1)COc2ccccc2CBr	C01436035
CN(Cc1ccsc1)c2cccc(c2CCl)Cl	C35719566
c1cc(c(cc1Cl)CBr)OCC(F)F	C37756209
C1CCC(CC1)CO[C@@H]2CCC[C@@H]2Br	C52147231
c1ccc(cc1)C2(CC2)C(=O)Cc3c(cccc3Cl)F	C61618123
COCC[C@@H](Cc1cccc(c1)Br)Cl	C62147869
Cc1ccc(cc1C)C[C@@H](c2cccnc2)Br	C62148603
Cc1ccoc1[C@@H](Cc2ccccc2F)Br	C62168295
C[C@@H](c1nc(no1)Cc2ccc(cc2Cl)Cl)Cl	C35347213
c1ccc2c(c1)ncc(n2)Oc3ccccc3Br	C39085773
C[C@@H]1CN(CC(O1)(C)C)[C@@H]2C[C@@H](CC[C@@H]2C#N)C(C)(C)C	C45691224
CCC(C)(C)[C@@H]1CC[C@@H]([C@@H](C1)N2CCOCC2(C)C)C#N	C48945579
Cc1cn2c(n1)sc(n2)S[C@H](C)c3ccc(cc3)F	C49469451
C[C@@H](C(=O)N/N=C/c1ccco1)Oc2ccc(cc2)OCc3ccccc3	C03167091
Cc1ccc(cc1)CCNc2c3cnn(c3nc(n2)SC)[C@H]4CCCCO4	C01614198
CCc1ccc2c(c1)sc(n2)NC(=O)c3cc(c(cc3OC)OC)OC	C03336385
c1ccc(cc1)Cc2ccccc2NC(=O)COc3ccc(cc3)[N+](=O)[O-]	C07344687
CCCn1c(=O)[nH]nc1SCC(=O)O[C@H]2C[C@H](CC[C@@H]2C(C)C)C	C08718144
CCC[C@H]1c2cccn2CCN1C(=O)NC3(CCCCC3)CC(=O)OCC	C09528183
C[C@H]1CCCC[C@H]1NC(=O)[C@@H](C)Sc2nnc(n2CC(C)C)c3ccco3	C09566983
CC(C)c1ccc(cc1)OCC(=O)Nc2nc3cc(c(cc3s2)OC)OC	C36685302
CCOc1ccc(cc1)C2=C[C@@H](N=N2)C(=O)N/N=C/c3cccc4c3cccc4	C39922611
CC[C@@H](C)[C@@H](C(=O)N1CCC[C@@H](C1)c2nccs2)NC(=O)OC(C)(C)C	C67046750
c1ccc(cc1)[C@H](C#Cc2cccs2)O	C19796786
C[C@@H](Cc1ccccc1Br)O	C37465455
C1C[C@@H]([C@]2(CC[C@@H](C2)Br)N(C1)F)O	C39512834
c1c(nc(s1)NC2CC2)Br	C44116864
[H]/N=C/1\C=C(CS1)c2ccc(s2)Cl	C57497581
c1ccc2c(c1)C[C@@H]([C@H]2O)Cc3ccco3	C62102571
c1ccc(cc1)CC(=O)Nc2nc(cs2)c3ccc(cc3)I	C01510704
Cc1ccc(cc1)c2csc(=S)n2CC(=O)Nc3c(cc(cc3C)C)C	C02635319
c1cc(sc1CCNC(=O)c2cc(c(nc2)Cl)Cl)Br	C10499862
CSCc1csc(n1)NC(=O)c2ccccc2I	C12287061
CCN(c1ccccc1)C(=O)c2cccc3c2N[C@H]([C@@H]4[C@@H]3C=CC4)c5c(ccs5)C	C14456162
CC[C@H](C(=O)Nc1nc2c(cc(cc2s1)Br)C(C)C)Br	C20132346
C[C@@H](Cc1ccc(cc1)Cl)NCc2ccc(o2)I	C37274639
Cc1cc(c(c(c1)Br)NC(=O)Cc2nc(cs2)CCl)Br	C37302782
C#CCOc1ccc(cc1CNc2ccccc2Br)Br	C41641012
Cc1cc(c(s1)C)S(=O)(=O)N[C@@H](C)c2ccc(cc2)Br	C32551148
Cc1ccc(c(c1)Cl)S(=O)(=O)NCc2cc(cs2)Br	C48671489
c1ccc2c(c1)nc(s2)[C@@H]3CC=CC[C@@H]3C(=O)Nc4cccc(c4)C5SCCS5	C58666653
c1cc(ccc1[C@H]2CN(CCO2)C[C@@H](c3ccc(c(c3)F)F)O)Br	C63581050
Cc1nc2c(c3c(s2)CCC3)c(n1)SCC(=O)NCc4cccs4	C03245941
c1ccc(cc1)[S@@](=O)Cc2ccc(o2)C(=O)NCc3ccc(cc3)Cl	C06772063
C[C@@H](Cc1cn(c2c1cc(cc2)Br)C)NC(=O)/C=C/c3ccoc3	C16888694
CSc1ccc(cc1)N2C[C@H](CC2=O)C(=O)Nc3ccccc3SC	C24433115
CN1CCN(CC1)C(=S)SCC(=O)Nc2c(cccc2Cl)Cl	C32693390
c1ccc(cc1)Cn2cc(cn2)CNC(=O)c3cc(sc3)Br	C47186456
C[C@@H]1CN(C[C@H](O1)C)Cc2ccccc2CNC(=O)C3(CC3)c4ccccc4	C59058943
Cc1c(cn(n1)c2ccccc2)CNCC3(CCOCC3)c4ccc(cc4)F	C67248625
c1ccc(c(c1)/C=C(\C#N)/c2nc3cc(ccc3s2)Cl)F	C12907981
c1cc2c(c(c1)I)c(nc(n2)C(F)(F)F)Cl	C26894535
c1cc2c(cc1C(=O)c3ccc(s3)Br)CCO2	C35368861
c1cc2c(cc1F)nc(n2c3ccc(cc3Br)F)CCl	C36898157
c1ccc(cc1)N2C(=S)CCC(=N2)c3ccc(cc3)Br	C04855569
c1ccc(cc1)S(=O)(=O)[C@@H]2CC3c4ccccc4C2c5c3cccc5	C39247182
c1cc(ccc1/C(=C\[C@@H]2C=CC=N2)/C#N)I	C39370760
CN([C@@H]1CCc2c1cccc2)C(=O)c3ccc(cc3)I	C42337144
c1cc(c(cc1F)Br)Cn2cc(ccc2=O)Br	C48405518
Cc1c(c(n(n1)Cc2cc(cs2)Br)C)Br	C50594001
c1cc(c(cc1n2c(nc3c2c(c(cc3)F)F)CCl)F)F	C53170868
Cc1c(c(n(n1)Cc2ccc(cc2)Br)C)Br	C50594444
CC(C)(C)[C@H]1CCC2(C3(C1)SCCS3)OCCO2	C00366980
Cc1ccsc1/C=C(/c2nc3ccccc3s2)\Cl	C11332215
Cc1ccc(cc1)c2cn3cc(ccc3n2)Br	C01291506
CO[C@H]1CCC[C@]2(C1)CCC[C@@H](N2I)Cl	C39526100
Cc1ccoc1[C@H](c2ccc(s2)Cl)Br	C40284938
c1c(c(sc1Cl)Cl)[C@@H]([C@@H]2CCCO2)Br	C40288780
C[C@H]1Cc2cc(ccc2O1)[C@H]([C@@H]3C[C@@H]3C)Br	C40289261
c1ccc-2c(c1)Cc3c2cc(cc3)[C@H]([C@@H]4CCOC4)Cl	C48629754
C[C@H](c1c(cc(cn1)Cl)Cl)[C@H](C)Br	C63046271
Cc1ccc(c(c1)C)NN2C(=O)c3cccc4c3c(cc(c4)Br)C2=O	C00686937
c1ccc(cc1)[C@@H]2C3=C(C[C@H](CC3=O)c4cccs4)Nc5n2c6ccccc6n5	C04741584
c1cc(sc1)[C@@H]2CC3=C([C@H](CC(=O)N3)c4ccc(cc4)Br)C(=O)C2	C06819555
Cc1ccccc1[C@H]2[C@@H]3CC=C[C@@H]3c4cccc(c4N2)C(=O)N5CCC(CC5)C	C14478827
c1ccc2c(c1)cc(cn2)NC(=O)c3c(c(c(c(n3)Cl)Cl)Cl)Cl	C23353195
Cc1cc(c2c(c1)c(cc(n2)C)C(=O)NCc3ccccc3Br)C	C33252875
CC(=O)c1ccc2c(c1)[C@H]3C=CC[C@@H]3[C@@H](N2)c4cc5c(cc4Br)OCO5	C04959601
Cc1c(s/c(=N/S(=O)(=O)c2c(cc(cc2Cl)Br)Cl)/[nH]1)C	C40419589
c1cc([nH]c1)[C@H]2CCCN2C(=O)CC34C[C@H]5C[C@@H](C3)CC(C5)(C4)Br	C61397555
C[C@@H]1CCC2=NN([C@@]([C@@H]2C1)(C(F)(F)F)O)c3nc(cs3)c4ccc(cc4)Cl	C05275003
Cc1c(c2ccccc2[nH]1)/C=C\3/C(=O)OC(=N3)c4ccccc4I	C03342059
c1cc(c(cc1Br)Br)S(=O)(=O)/N=c/2\[nH]c3c(s2)CCC3	C48444260
Cc1c2c(n(n1)c3ccc(cc3)F)NC4=C([C@@H]2c5cccs5)C(=O)c6c4cccc6	C03258569
c1cc(ccc1[C@H]2C[C@@H](Nc3n2ncn3)c4ccc(cc4)I)F	C02916316
c1ccc(c(c1)[C@H]2c3cc(ccc3N=C([C@@H]2N4CCOCC4)O)Br)Cl	C20101999
CC[C@H](C)n1c(c(sc1=O)/C=C/2\C=Nc3c2cc(cc3)Br)O	C05555798
CCC(=O)N1c2ccccc2NC3=C([C@@H]1c4c(ccs4)C)C(=O)CC(C3)(C)C	C18244469
Cc1c2c(on1)NC3=C([C@@H]2c4cccs4)C(=O)C[C@H](C3)c5ccccc5	C20715203
c1csc2n1c3cc(sc3n2)C(=O)N[C@H]4CCC[C@@H](C4)C(F)(F)F	C27853550
c1cc(ccc1[C@H]2C=C(N=C3N2NC=N3)c4ccc(cc4)F)Br	C00629259
Cc1ccc2c(c1)sc(n2)NC(=O)c3c(sc(n3)C)c4ccccc4	C40326744
COc1cccc2c1nc(s2)NC(=O)c3c(ccs3)Br	C42394899
c1ccc2c(c1)c(=O)nc\3n2CC/C3=C\c4cc(ccc4O)Br	C05452016
c1cc(cc2c1cc([nH]2)C(=O)N3CCO[C@H]4[C@H]3CCCC4)Br	C58445929
Cc1ccccc1n2c(c3c(n2)CSC3)NC(=O)c4ccccc4Cl	C04175948
c1ccc2cc(ccc2c1)C(=O)Nc3ccc(cc3)c4cn5c(n4)SCC5	C04249089
Cc1cc(c2c3c(c(n[nH]3)c4ccc(cc4)Br)sc2n1)COC	C12445643
Cc1ccc(c(c1)C)c2csc(n2)NC(=O)c3ccc4ccc(nc4c3)C	C06415178
c1cc(c(cc1Cl)Cl)c2csc(n2)NC(=O)c3ccc(nc3)Cl	C14502176
Cc1ccc(cc1)[C@@H]2c3c(nn(c3NC4=C2C(=O)CCC4)c5ccccc5)C	C15830278
Cc1cc(ccc1NS(=O)(=O)c2ccc3c(c2)N(CCS3)C)Cl	C32943663
c1ccc2c(c1)[nH]c(n2)SC[C@H]3[C@H](N4C=CSC4=N3)Br	C38918759
c1ccc2c(c1)nc(s2)[C@@H]3CCCN(C3)C(=O)c4ccc(cc4O)Cl	C40817817
c1c/c(=[NH+]\S(=O)(=O)c2ccc(s2)Br)/c-3ccc[n-]c3c1	C42260167
Cc1ccc(cc1)NC(=O)c2c(onc2c3ccc(s3)Br)C	C64820191
c1ccc(cc1)c2cc3c(s2)ncnc3SCC(=O)N4CCCc5c4cccc5	C06170938
Cc1ccc(cc1)n2c(=O)c3c4c(sc3nc2SC[C@H]5CCCCO5)CCCC4	C02395055
c1ccc(cc1)C(=O)[C@H]2N3[C@H](CC(=N3)c4cccs4)c5cc(ccc5O2)Br	C15224456
CC1(CN(C(=O)N1CC2(CCN(CC2)Br)C3CCCCC3)SC)C	C39486989
c1ccc(c(c1)c2ccc(o2)/C=C/3\C(=O)N(C(=O)S3)c4cccc(c4)Cl)Cl	C39860595
Cc1ccc(c(c1)Cn2c3ccccc3nc2[C@@H]4CC(=O)N(C4)c5cc(ccc5C)C)C	C40252105
Cc1cccc(c1)N2C[C@H](CC2=O)c3nc4ccccc4n3Cc5c(cc(cc5C)C)C	C40253905
Cc1ccsc1C(=O)c2c([nH]c3c2cccc3)C	C35369127
Cc1c(c(c(c(c1C)C)[C@H](c2cccnc2)O)C)C	C40245446
CC(C)c1cccc(c1)n2ccc3c2CCC[C@@H]3O	C41715196
c1ccc2c(c1)CC[C@@H](C2)Nc3ccc(cn3)Cl	C51632537
c1cc(c2c(c1Br)CCOC[C@H]2O)Br	C54743029
c1cc(c(c(c1)Cl)Cl)[C@H](c2ccncc2)O	C55201422
c1cc2c(cc1Br)[C@@H]3C=CC[C@H]3[C@@H](N2)c4ccncc4	C04140594
c1ccc2c(c1)[C@H](CCO2)Nc3ccc(c(c3F)F)F	C19907729
[H]/N=C/1\C2=C3CC[C@H](C[C@H]3SC2=NC(=S)S1)C(C)(C)C	C39147049
Cc1ccc(s1)[C@H](c2cc(cnc2)Br)O	C40242313
c1cc(=S)[nH]nc1c2ccc(s2)Br	C41408821
C[C@H](c1ccc(cc1Cl)Cl)n2ccc3c2CCC[C@@H]3O	C41710799
C[C@H](c1cccs1)n2ccc3c2CC(C[C@H]3O)(C)C	C41716248
Cc1ccc(s1)[C@H](c2ccc(cn2)Br)O	C61864358
c1ccc2c(c1)CCC[C@@H]([C@@H]2O)Oc3cccc(c3F)F	C62652869
c1cc(cc(c1)Br)c2[nH]cc(n2)CCl	C62820705
CC(=O)/C=C/[C@@H]1[C@]2(CCCC([C@@H]2CC[C@@]1(C)O)(C)C)C	C04478060
C1C[C@H]([C@]2(CC[C@@H](C2)Br)N(C1)Br)O	C39512821
C[C@@H]1c2ccsc2CCN1Cc3cccc(c3)C#CCO	C42780273
c1cc(ccc1[C@H](c2ccc3c(c2)COC3)O)Br	C62334590
CC(C)(c1ccccc1)c2nc3c(s2)[C@@H](CCC3)O	C62773698
c1cc2c(cc1[C@H](c3c[nH]nc3)Br)CCC2	C62779397
c1cc2c(c(c1)N)C(=O)C(=C(C2=O)Br)Br	C00480658
c1cc(c(cc1Br)F)CSc2ccncc2N	C35285032
Cc1ccc(cc1N2Cc3ccc(cc3C2)N)Br	C37369300
C[C@@H](c1ccc(cc1)N)Sc2nc3ccccc3s2	C40909240
c1ccc(c(c1)[C@H](c2nc3c(s2)CCC3)N)Br	C41183661
c1ccc2c(c1)C[C@H](N(C2)Cc3ccccc3Br)CN	C51860236
CSc1nc2ccc3c(c2s1)sc(n3)N	C02455291
c1ccc(cc1)C2(CCCC2)c3csc(n3)N	C00288917
C[C@@]12CCC[C@]([C@@H]1C[C@@H](CC2)C(C)(C)O)(C)O	C08242570
c1ccc(cc1)c2csc(n2)c3ccc(cc3)N	C11632144
c1cc(ccc1C2=CSC3=NCCCCN23)N	C00337028
Cc1c(sc(n1)N)Cc2ccc3c(c2)CCC3	C36852872
Cc1c(noc1N)c2c(cccc2Cl)Cl	C36937291
C#CCSc1ccc(cc1N)Br	C37205855
c1cc2cccc3c2c(c1)NC(N3)c4ccncc4	C00055558
C[C@@H]1CCCC[C@H]1N(C)c2c(ccc(c2F)F)N	C53167079
Cc1c(sc2c1c(=O)sc(n2)NC(=O)c3c(c4ccccc4s3)Cl)C	C00948558
Cc1cc(c(n1c2ccc(cc2)I)C)/C=N/c3ccc(cc3)O	C00829449
c1ccc2c(c1)C(c3ccccc3O2)C(=O)Nc4nc5ccc(cc5s4)Cl	C06341630
c1cc(c(cc1[C@@H]2[C@H]3CC=C[C@@H]3c4cc(ccc4N2)Br)[N+](=O)[O-])Cl	C06969835
[H]/N=C\1/[C@H]([C@@H]([C@H]2C[C@H](CC=C2C1(C#N)C#N)C(C)(C)C)c3ccc(s3)Cl)C#N	C13479791
Cc1cc(cc2c1N[C@H]([C@@H]3[C@@H]2C=CC3)c4c5ccccc5cc6c4cccc6)[N+](=O)[O-]	C14549144
c1cc2c(cc1Cl)[C@H](CCS2)NS(=O)(=O)c3ccc(s3)Br	C16735976
c1cc(c(cc1F)Br)NCc2cc3c(c(c2)Br)OCCO3	C37324826
Cc1c(ccc2c1nc(s2)NC(=O)C3c4ccccc4Oc5c3cccc5)Cl	C36695119
c1cc2c(cc1/N=C/c3cc(c(cc3O)Br)Br)nccn2	C03153198
c1ccc2c(c1)nc3n2c(=O)/c(=C\c4cc(c(c(c4)Br)O)Br)/s3	C23382520
Cc1ccc(cc1)c2nc3c(s2)CN(CC3)C(=O)Nc4ccc(cc4Cl)C	C64660001
CO[C@H](C(=O)c1c2c(cc3c1CC4(C3)Cc5cc6c(cc5C4)CCC6)CCC2)O	C06403148
CN(C1CCCCC1)C(=O)c2cccc3c2N[C@@H]([C@H]4[C@@H]3C=CC4)c5cccs5	C14548739
Cc1ccccc1Cn2cc(c3c2cccc3)/C=C\4/C(=O)NC(=S)S4	C15800599
CN1CCC[NH+](CC1)Cc2cc(cc(c2[O-])Br)Br	C19633960
c1ccc2c(c1)[C@@H](CCS2(=O)=O)Nc3cccc(c3)I	C37247861
c1cc(c(cc1Br)F)[C@@H](c2cc3c(cc2Cl)OCCO3)O	C40260057
CC(C)(C)NC(=O)c1cc(cc(c1OC)Br)Br	C08186006
Cc1ccc(s1)/C=N/NC(=O)c2ccccc2I	C59508294
Cc1cc([nH]c(=O)c1C(=O)/C=C/c2ccc(cc2)I)C	C04066704
Cc1c(cc(c(c1Br)O)C(=O)CSC#N)Br	C06417908
C[C@H](c1ccccn1)NC(=O)c2cc(c(s2)Br)Br	C28779423
c1c(c(sc1C(=O)NC[C@H]2CCCO2)Br)Br	C12623099
Cc1c(c2c(n1SC)-c3c(c(=O)c4ccccc4[nH]3)C(=O)CC2)Br	C39456974
Cc1cc(c(c(c1)C)NC(=O)/C(=C/c2cc(sc2)Br)/C#N)C	C45110627
Cc1c(scn1)C(=O)Nc2ccc(cc2Cl)I	C48704179
c1cc2c(cc1NCc3cc(c(o3)Br)Br)CCO2	C50360352
c1ccc(c(c1)C(=O)Nc2ccc(cc2)c3nccs3)Br	C07684023
CC(C)c1ccc(cc1)[C@@H]2[C@@H]3CC=C[C@@H]3c4cccc(c4N2)C(=O)N(C)C	C14463102
Cc1cc(ccc1NC(=O)c2ccc(cn2)Br)I	C61873769
COc1c(cc(cc1Br)Cl)[C@H](c2c[nH]nc2)Br	C62779189
Cc1cc(ccc1NC(=O)c2c3ccccc3c(=O)n(n2)C)I	C03275157
Cc1cccc(c1C)n2c(c3c(n2)C[S@](=O)C3)NC(=O)c4c(cccc4F)F	C04224893
c1c(cnc(c1Br)Cl)S(=O)(=O)Nc2nc3c(s2)CCCC3	C06858635
Cc1c(c2c(n1I)-c3c(c(=O)c4ccccc4[nH]3)C(=O)CC2)SC	C39456931
c1cc(cc(c1)Br)N2C[C@H](CC2=O)C(=O)Nc3nc4c(s3)CCCC4	C44442521
Cc1ccccc1C(=O)NN2C(=O)/C(=C/3\c4cc(ccc4N(C3=O)C)Br)/SC2=S	C01104336
CCc1ccccc1n2c(cc(c2C)/C=C\3/C(=O)NC(=S)N(C3=O)c4ccc(cc4)F)C	C09311661
Cc1c(sc(c1c2nc3ccccc3s2)NC(=O)c4cccc(c4)S(=O)(=O)C)C	C09762055
Cc1c(sc2c1c(=O)n(cn2)CCC(=O)Nc3ccc(cc3Cl)Br)C	C23446945
Cc1cccc(c1)N2C[C@H](CC2=O)C(=O)Nc3nc(cs3)c4ccc(cc4)Br	C59317750
c1cc(ncc1Br)NC(=O)[C@@H]2CCCN(C2)C(=O)c3csc4c3CCCC4	C59332880
CCOc1cc(c(c(c1O)/C=N/c2ccc3c(c2)OCCO3)Br)Br	C59476470
c1cc(ccc1CNc2c3cc(ccc3ncc2C(=O)N4CCOCC4)Cl)Br	C67288381
C[C@@]12c3c(c4ccccc4[nH]3)CCN1C(=O)CN(C2=O)/N=C/c5ccccc5Cl	C02147732
c1ccc2c(c1)CCC[C@H]2NC(=O)[C@@H]3CCCN(C3)C(=O)N4CCOc5c4cccc5	C09405943
C[C@@]1(C(=O)N(C(=O)N1)CC(=O)N2CCc3c(ccs3)C2)c4ccc5ccccc5c4	C14175387
C[C@H]1c2ccsc2CCN1C(=O)CN3C(=O)C4(CCC(CC4)C(C)(C)C)NC3=O	C22972726
Cn1c2ccccc2nc(c1=O)N3CCC(CC3)C(=O)N[C@@H]4CCCc5c4cccc5	C64873792
C/C(=C\c1cc(cc(c1O)Br)Cl)/C=O	C05516749
Cc1c([nH]nc1c2ccc(cc2)F)c3ccc(cc3)F	C12357835
c1cc2c(c(c1)Br)N[C@@H]([C@@H]3[C@H]2C=CC3)c4cccnc4	C20750847
c1ccc(cc1)[C@@H]2CN/C(=N\c3ccccc3F)/S2	C35082557
C/C(=N/O)/c1c(cc(s1)Br)Br	C39296476
C1C[C@H](C[C@]2(C1)CCC[C@@H](N2Cl)O)Br	C39524339
Cc1cc(c(o1)C)[C@H](c2c(c(c(c(c2C)C)C)C)C)O	C40245458
C[C@H]1Cc2cc(ccc2O1)[C@@H](c3ccccc3Cl)O	C41066657
C[C@@H](c1cccs1)n2ccc3c2CC(C[C@H]3O)(C)C	C41716244
Cc1cc2c(n1[C@H](C)c3ccccc3F)CCC[C@H]2O	C41718441
c1c(cc(cc1F)F)[C@@H](c2cc(c(c(c2)F)F)F)O	C55203252
c1cc(ncc1Br)[C@H](C2=CCCCC2)O	C61870433
c1ccc(c(c1)[C@@H]2[C@@H]3CC=C[C@@H]3c4cc(ccc4N2)F)O	C14473766
c1c(sc(n1)N)Cc2c(c(c(c(c2F)F)F)F)F	C21951251
c1cc(ccc1Sc2ccncc2N)Br	C36962222
c1cc(ccc1Sc2ccc(nc2)N)Br	C37381412
c1cc(c(c(c1)F)[C@H](c2ccc(s2)Br)N)F	C40236351
c1cc2cccnc2c(c1)[C@H](c3ccc(s3)Br)N	C61414644
C/C(=C\c1ccccc1)/C=C\2/C(=S)NC(=O)S2	C04756134
c1cc(c(cc1Br)C2SCCS2)O	C00165998
c1ccnc(c1)[C@@H]2[C@H]3CC=C[C@H]3c4cccc(c4N2)F	C12951146
c1cc(ccc1c2csc(=O)[nH]2)Br	C04290542
c1cc(sc1C[C@H]2CCC[C@H]2O)Br	C43655999
C[C@H]1CC[C@H]([C@@H](C1)Cc2cc(cs2)Br)O	C43688755
CC1(CCCC1)NC(=O)c2csc3c2CCCC3	C49223004
c1cc(cc(c1)Cl)Cn2ccc3c2CCC[C@@H]3O	C53161175
C[C@@H](c1cnc(s1)c2ccc(cc2F)Cl)O	C62786693
CC1=CC[C@@H]2C[C@H]1[C@@H](OC2(C)C)c3ccccc3O	C00519436
Cc1ccc2c(c1)nc(s2)c3ccc(c(c3)O)C	C37205973
c1ccc2c(c1)CC[C@H](C2)Nc3ccccc3Cl	C37210825
Cc1c(c(c(c(c1C)C)[C@H](c2cccs2)O)C)C	C40245452
Cc1ccc(c(c1)C)[C@@H](c2cc3c(s2)CCC3)O	C40245970
Cc1ccsc1[C@@H](c2csc3c2cccc3)O	C42268470
c1ccc2c(c1)cc(s2)[C@@H](C3=CCCCCC3)O	C50329410
Cc1ccc(cc1[C@H](c2c(c(cc(c2C)C)C)C)O)F	C62666067
c1cc2c(c(c1)Br)N[C@H]([C@H]3[C@@H]2C=CC3)c4ccc(cc4)O	C13637160
Cc1ccccc1[C@@H]2[C@@H]3CC=C[C@@H]3c4c(ccc(c4N2)O)C	C14478620
CC(C)(C)c1csc2n1c(c(n2)c3ccc(cc3)F)N	C36290306
Cc1cc(ccc1/N=N\c2ccc(cc2)Br)N	C04774664
c1ccc(c(c1)n2c3cccc(c3nc2N)F)I	C37421329
CCn1c2ccc(cc2nc1c3ccc(c(c3)C)N)Cl	C37440332
Cn1c2ccc(cc2nc1c3ccc(cc3N)Br)Cl	C37742628
CC1(C[C@]23CCCCCCCCCC[C@@]2(C1)CC(C3)O)O	C45071308
C[C@H]1c2ccsc2CCN1c3cccc(c3C(=S)N)Cl	C52907313
c1ccc(cc1)c2cn(c(n2)SCC(=O)Nc3ccc(cc3)Cl)Cc4ccccc4Cl	C13568327
CCOc1ccccc1NC(=O)CSc2cn(c3c2cccc3)Cc4ccc(cc4)Br	C35238273
c1ccc(cc1)Cn2c3ccccc3nc2CCCCCNC(=O)c4ccc(cc4)Br	C40214351
Cc1ccccc1n2c(cnc2SCC(=O)Nc3ccc4c(c3)CCC4)c5ccc(cc5)Cl	C03306333
Cc1cc(c(cc1Cl)C)S(=O)(=O)Nc2cc(sc2C(=O)C)c3ccc(cc3)C(C)(C)C	C08618145
Cc1ccc(cc1)n2cc(nc2SCC(=O)Nc3ccccc3Cl)c4ccc(cc4)Cl	C09529373
CN(c1ccccc1)C(=O)c2ccc3c(c2)[C@@H]4C=CC[C@H]4[C@@H](N3)c5ccc(cc5)OCc6ccccc6	C14470467
CCCN(CCC)C(=O)c1ccc2c(c1)[C@H]3C=CC[C@H]3[C@@H](N2)c4c5ccccc5cc6c4cccc6	C14549472
Cc1ccccc1NC(=O)CSc2c3c4c(sc3nc(n2)SCc5ccccc5)CCCC4	C24546031
c1ccc(cc1)/C=C/C=C(/C#N)\c2nc(c(s2)NC(=O)c3ccc(cc3)Cl)c4cccs4	C27023382
Cc1ccc2c(c1)sc(n2)NC(=O)CSc3cn(c4c3cccc4)Cc5ccccc5Cl	C33392482
Cc1c(cccc1Cl)S(=O)(=O)N[C@H](c2ccc(cc2)SC)c3cccc(c3Cl)Cl	C39196043
Cc1cccc(c1n2c(c(c(c2C)Br)/C=N/NC(=O)CSc3ccc(cc3)Cl)C)C	C20243698
Cc1cc(c(n1c2ccc(cc2Cl)Cl)C)/C=N/NC(=O)CSC3c4ccccc4-c5c3cccc5	C58853757
Cc1ccc(cc1)COc2ccc(cc2I)/C=N/NC(=O)c3cccs3	C59197798
C=CCn1c(=O)c2c3c(sc2nc1SCC(=O)Nc4ccc(cc4)c5ccccc5)CCCC3	C03069818
C=CCOc1ccc(cc1/C=C(\C#N)/C(=O)Nc2ncc(s2)Cc3ccc(cc3)F)Br	C01906139
C=CCn1c(=O)c2c(csc2nc1SCC(=O)Nc3cc(cc(c3)Cl)Cl)c4ccccc4	C09041594
C=CCN\1C(=O)[C@@H](S/C1=N\c2ccc(cc2)SC(F)F)CC(=O)Nc3cccc(c3Cl)Cl	C12538327
c1ccc(c(c1)CNn2cnnc2SCc3ccc(cc3)F)OCc4ccc(cc4Cl)Cl	C16449800
CCOC(=O)c1c(csc1NC(=O)COc2cc(cc(c2)C)C)c3ccc(cc3)Br	C01944155
c1cc(ccc1OCC(=O)Nc2nnc(s2)SCc3ccc(cc3Cl)Cl)Br	C33422738
Cc1ccccc1CSc2nnc(n2c3cc(ccc3C)Cl)CNC(=O)Cc4cccs4	C35265083
Cc1ccccc1[C@H](C(=O)NC(C)(C)CC(C)(C)C)N(Cc2ccco2)C(=O)C#Cc3ccccc3	C36499977
CCN(CC)C(=O)[C@@H]1CC=CC[C@@H]1C(=O)Nc2ccc(cc2C(=O)c3ccccc3Cl)Br	C38711972
CCc1cccc(c1NC(=S)N2CCc3cc(c(cc3[C@@H]2COc4cc(cc(c4)C)C)OC)OC)C	C39724418
c1ccc2c(c1)nc(n2Cc3cccc(c3)Br)CCCNC(=O)COc4ccc(cc4)Cl	C40209721
CCCCOc1ccc(cc1)[C@@H](C)NC(=O)[C@@H](C)[C@@H]2C(=O)N(c3ccccc3S2)Cc4ccccc4C	C09692833
CCCCNC(=O)c1ccc(cc1)CSc2nc(cc(n2)Cl)N3CCC(CC3)Cc4ccccc4	C35317841
CCc1cccc2c1[nH]cc2[C@@H](CC(=O)N3CCN(CC3)c4ccccc4OCC)c5ccc(cc5)Cl	C35888734
CCC/C=C/[C@@H](C(=O)NC(C)(C)CC(C)(C)C)N(Cc1ccco1)C(=O)Cc2ccc(cc2)Br	C36497721
Cc1ccccc1CC(=O)N(Cc2ccc(o2)C)[C@H](c3ccccc3C)C(=O)NC(C)(C)CC(C)(C)C	C36556576
Cc1cccc(c1C)OCCCCn2c3ccccc3nc2CCCNC(=O)Cc4ccc(cc4)Cl	C40208839
Cc1ccc(c(c1)OCCn2c3ccccc3nc2CCCCCNC(=O)Cc4ccccc4Cl)C	C40221453
Cc1ccc(cc1n2c(nnc2SCc3ccccc3)CNC(=O)c4ccc(cc4)c5ccccc5)Cl	C40362706
CCCc1ccc(c(c1)Br)OCC(=O)Nc2c(c(cs2)c3ccc(cc3)CC)C(=O)OC	C41017343
CN(C)C(=O)c1cccc2c1N[C@@H]([C@H]3[C@H]2C=CC3)c4c5ccccc5cc6c4cccc6	C20753626
c1ccc(cc1)[C@@H]2CC3=C([C@H](CC(=O)N3)c4cc(ccc4F)Br)C(=O)C2	C20883813
Cc1ccc(cc1)[C@H]2CC3=C([C@@H](CC(=O)N3)c4cc(ccc4F)Br)C(=O)C2	C21256208
CN(C)c1ccc(cc1NCc2ccc(cc2)Br)Br	C35046189
Cc1cc(ccc1N[C@@H]2CCS(=O)(=O)c3c2cccc3)I	C37297602
c1ccc(c(c1)C(=O)Nc2c(cccc2Cl)Cl)I	C42200191
C[C@H](c1cc(ccc1OCc2ccccc2Br)Br)O	C52067943
c1ccc(cc1)c2csc(n2)CNc3ccccc3I	C61680812
c1cc(sc1)[C@@H]2CC3=C([C@@H](CC(=O)N3)c4ccc(cc4)Cl)C(=O)C2	C00816231
c1cc(c(cc1F)C(=O)Nc2nc3c(s2)CCCCC3)Br	C12781625
Cc1c(ccc(n1)NC(=O)c2ccccc2Br)Br	C06571283
c1cc(c(nc1)Cl)C(=O)Nc2c(cc(cc2Cl)Cl)Cl	C20303954
c1ccc2c(c1)/C(=N/c3ccc(cc3)I)/C(=O)N2	C06534236
c1cc(c(cc1Cl)Cl)CNC(=O)C2=C(CCCC2)Cl	C11430178
c1csc(c1Br)C(=O)NCc2cc(cs2)Br	C46255449
C/C(=C\C(=O)Nc1ccccc1Br)/c2ccccc2F	C48963823
c1ccc2c(c1)ccc(n2)[C@H](Cc3c(cccc3Cl)Cl)O	C63075718
c1ccc(cc1)C#Cc2ccc(cc2)C(=O)Nc3nc4ccccc4s3	C12822139
c1ccc(c(c1)NC(=O)C23C[C@H]4C[C@@H](C2)CC(C4)(C3)Cl)Br	C12615550
c1cc(c(cc1C#N)Br)NCc2ccc(s2)Br	C37072184
c1cc2c(ccc(c2nc1)Cl)NCc3cc(cs3)Br	C37101708
C[C@]1\2CC[C@H](C1(C)C)C/C2=N\NC(=O)c3ccc(s3)Br	C48416617
c1ccc(cc1)[C@H]2CS/C(=N\c3cc(c(cc3Cl)Cl)Cl)/N2	C63001252
c1ccc(c(c1)C(=O)N/N=C\2/C[C@H]3CC[C@@H]2C3)Br	C00370387
C[P@]1(=S)c2nccn2-c3ccc(cc3N1)C(F)(F)F	C05660242
Cc1ccccc1[C@H]2[C@H]3CC=C[C@@H]3c4cc(ccc4N2)C(=O)N(C)C	C14479093
c1ccc2c(c1)/C(=C/C(=O)c3ccc(s3)Br)/C(=O)N2	C32646453
Cn1c2c(cn1)[C@@H](CCC2)Nc3ccccc3Br	C37051605
c1cc(sc1)C(=O)NN=C2[C@@H]3CC4C[C@H]2CC(C3)(C4)Cl	C13571521
CON1CCC[C@@H]([C@@]12CC[C@@H](C2)Br)c3ccccc3O	C39512746
Cc1ccc(s1)[C@H](C)n2c(=O)c3c(c(sc3[nH]c2=S)C)C	C49185533
Cc1c(c(=O)[nH]c(n1)c2ccc(cc2)Br)C(C)C	C61688264
Cc1c2c(c(c(c1Cl)C)Br)O[C@H](C(=O)N2)C	C62563090
c1ccc2c(c1)C[C@@H](S2)C(=O)Nc3cccc(n3)Br	C65879705
c1c(cc(c(c1Cl)I)Cl)[N+](=O)[O-]	C02522759
c1nc(c2c3c(sc2n1)CCC3)N4CCC[C@@H](C4)C(F)(F)F	C06786608
c1ccc2c(c1)CCN(C2)c3c(cc4cccc(c4n3)Cl)C=O	C19821791
Cc1cc(c(o1)C)C(=O)c2cc3cc(ccc3o2)Br	C20592593
Cc1ccccc1C2=N/C(=C/c3ccc(s3)Br)/C(=O)O2	C00478091
Cc1c2ccccc2c(nn1)S[C@H]3C(=O)[C@H]4CC[C@@]3(C4(C)C)C	C33942153
Cc1ccc(c(c1)C)N(C)C(=O)c2cc(cnc2Cl)Br	C50045796
CC(=O)C1=NN([C@@]2(S1)c3ccccc3CS2)c4ccccc4	C59449270
C[C@@H]1Cc2ccccc2N(C1)S(=O)(=O)c3ccc(s3)Cl	C62104620
Cc1ccc(c2c1N(CCC2)C(=O)c3nc(cs3)C(C)C)F	C66786644
c1cc2c(cc1Br)c(=O)n(cn2)Cc3cc(=O)n4ccsc4n3	C06112383
CC(C)n1c(=O)c2c3c(sc2nc1N4CCN(CC4)C(=O)C)CCCC3	C12391659
CN(C)C(=O)N1CCN(CC1)Cc2cc3c(c(c2)Cl)OCO3	C30968820
CN1c2ccccc2[C@@]3(C1=O)N(C(=O)CS3(=O)=O)c4ccccc4	C08597527
c1ccn2c(c1)nnc2[C@H]3CCCN(C3)C(=O)[C@@H]4Cc5cc(ccc5O4)Cl	C45865591
Cc1cn2c(n1)sc(n2)Sc3nnc(o3)C4CCCCC4	C51371975
c1cnccc1[C@@H]2[C@@H]3CSCC=C3C(=C(C2(C#N)C#N)N)C#N	C20598203
Cc1cccc(n1)C(=O)NNC(=O)C23CC4CC(C2)CC(C4)C3	C25121359
C[C@@H](c1ccc(cc1Cl)Cl)NC(=O)C2=NNC(=O)CC2	C35127412
c1cc(cc2c1cc([nH]2)C(=O)N[C@H]3CCS(=O)(=O)C3)Br	C44335406
c1cc(sc1c2nc(cs2)C(=O)Nc3cc[nH]n3)Cl	C49449425
C=CCN1C(=O)/C(=C\c2cc(c(c(c2)Cl)O)Cl)/NC1=O	C00561110
CC1(Cc2c(c(c([nH]2)c3ccc4c(c3)OCCO4)O)C(=O)C1)C	C06667789
c1ccc(cc1)[C@]23C[NH+]4CCN(C2)C[C@@H](C4)[C@]35C(=NC(=O)N5)[O-]	C19866125
CSC1=NC(=O)[C@@H]2[C@H](CC(=O)NC2=N1)c3ccc(cc3)O	C39007454
Cc1c(c(n[nH]1)C)S(=O)(=O)N[C@H]2CCCc3c2cco3	C40809536
Cc1c(sc2c1c(nc(n2)CSc3nnc(o3)C)N)C	C49957370
Cc1c(sc(n1)N)C(=O)N2CCN(CC2)c3nccs3	C55170690
CNC(=O)/C(=C\c1c[nH]nc1c2cc3ccccc3o2)/C#N	C63277314
CC(C)(C)C1=NN=C2[C@H]1[C@@H](C(=C(O2)N)C#N)c3ccncc3	C05044930
C1CCC(CC1)c2nnc(s2)NC(=O)N3CCC[C@H](C3)O	C43602831
c1cnccc1c2nc3c(c(n2)N[C@@H]4CCCNC4=O)CCC3	C66811190
CN1C(=O)C(=Cc2ccc(o2)c3ccc(cc3)Br)C(=O)N(C1=S)C	C00980473
Cn1c(=O)c2ccccc2c(n1)C(=O)N3CCc4c(ccs4)[C@@H]3c5cccs5	C07947501
C[C@H]1C[C@@H](CN(C1)C(=O)Cn2cnc3c(c2=O)c(cs3)c4cccs4)C	C21895499
Cc1cc(c(o1)C)C(=O)N2CCN(CC2)c3nc4c(c(ccc4s3)Cl)C	C36687963
CC(C)C(=O)/N=C/1\N([C@@H]2CS(=O)(=O)C[C@@H]2S1)c3c(cccc3Cl)Cl	C05370323
CCSc1nc2c(nn1)-c3ccccc3N([C@@H](O2)c4cccnc4)C(=O)C	C02470326
Cc1ccc(cc1)n2c3c(cn2)c(=O)n(cn3)CC(=O)N4[C@@H](CCC[C@H]4C)C	C01330693
Cc1ccccc1c2nc(no2)CC(=O)N3CCN([C@H](C3)C)C(=O)C(C)C	C04923082
c1ccc(cc1)n2cc(cn2)/C=C\3/C(=O)OC(=N3)c4ccc5c(c4)OCO5	C12921948
CN(Cc1ccc2c(c1)OCCO2)S(=O)(=O)c3cccc4c3nsn4	C19079232
c1ccc2c(c1)nc(s2)CN3CCN(CC3)c4ccc(nc4)[N+](=O)[O-]	C23466450
CN(C)S(=O)(=O)c1ccc2c(c1)CCN2Cn3c4ccccc4oc3=O	C28068390
CN1CCc2cccc3c2[C@H]1CN(C3)S(=O)(=O)c4cccc(c4)[N+](=O)[O-]	C33811751
C[C@H](C1=NC(=O)C2=C(CSC2=N1)c3ccccc3)Sc4nnnn4C	C39421753
Cc1c2c(c(ncn2)Sc3nnc(n3C)c4ccc(cc4)F)n(n1)C	C41683616
CCCC(=O)/N=C\1/N([C@@H]2CS(=O)(=O)C[C@@H]2S1)c3ccc4c(c3)OCO4	C05325357
c1cc(sc1)[C@H]2CCCN2C(=O)c3cc(cc4c3OCCO4)[N+](=O)[O-]	C66273505
CC[C@@H](C)[C@@H]1C2=C(CCN(C2)C(=O)[C@@H]3COC(=O)[C@@H]3C)N=N1	C39430730
C1C[C@H](CN(C1)C(=O)C(F)(F)F)C(=O)N2CCC3(CC2)OCCO3	C41231126
Cc1cccc(c1n2c(nnn2)CN3C[C@H](O[C@@H](C3)C)C)C	C60459876
Cc1cc(n2c(n1)ncn2)N(C)Cc3nc4ccccc4s3	C61173653
c1ccnc(c1)c2c(n3c(n2)sc(n3)c4ccncc4)C#N	C62396113
Cc1cc(no1)CN(C)C(=O)[C@@H]2[C@@H](Oc3ccccc3O2)C	C48253511
c1cc(c(cc1Cl)F)C(=O)N2CCN(CC2)C(=O)c3cnccn3	C58218555
C[C@H](C(=O)N1CCO[C@@H](C1)c2ccccc2F)n3cncn3	C67177204
Cc1nc2c(cnn2c3ccccc3)c(=O)n1c4ccccc4	C00064692
Cc1c(c(on1)C)S(=O)(=O)N2CCC[C@H]3[C@@H]2CCCC3	C07307639
[C@H]1(C(=C(C(=O)O1)Cl)Cl)O[C@@H]2C(=C(C(=O)O2)Cl)Cl	C08581139
C[C@@H]1C[C@H](CN(C1)C(=O)C[C@@H]2CSc3n2c(=O)ccn3)C	C14030929
CC(=O)c1ccc\2n1CC/C2=C/3\Cn4c(ccc4C(=O)C)C3=O	C17166963
C[C@H]1c2cccc(c2O[C@H]1C(=O)N3CCC4=C(C3)CN=N4)F	C39379672
CC1(COCCN1C(=O)/C=C/c2ccc3c(c2)OCCO3)C	C60542682
c1ccc2c(c1)[C@H](CCO2)C(=O)N3CCC4(CC3)OCCO4	C62633055
Cn1c2c(cn1)c(=O)n(cn2)Cc3ccc(s3)Br	C67006793
Cc1ccccc1[C@@H]2c3ccsc3CCN2C(=O)C4CC4	C00319392
c1cc(ccc1c2c3cc(sc3no2)I)Cl	C03407914
Cc1ccc(n1c2ccc(cc2C)I)C	C08413368
c1ccc2c(c1)CCN(C2)Cc3ccccc3Br	C19537259
c1cc(sc1[C@@H](c2cc(cnc2)Br)Cl)Cl	C40272625
c1cc(ncc1Br)[C@@H](c2c(cc(cc2F)F)F)Cl	C61870551
Cc1cc2c(o1)-c3c4cc(cc(c4oc3CC[C@@H]2C)Br)Br	C00854339
c1cc(cc(c1)Br)N2[C@@H](CC(=N2)c3cccs3)c4cccs4	C04578213
Cc1ccc(cc1)c2nc(on2)c3ccc(cc3)I	C01179103
Cc1c(sc2c1c(=O)n3c(n2)/C(=C\c4ccc(cc4)C(C)(C)C)/CC3)C	C07778335
C[C@H](c1ccccc1)N2C(=O)/C(=C/c3ccc(cc3)Br)/SC2=S	C09434458
Cc1ccc(c(c1)Br)n2c3c(cccc3Cl)nc2[C@H](C)Cl	C36911401
CS(=O)(=O)c1ccc(cc1)c2cc(sc2c3ccc(cc3)F)Br	C01532333
c1cc(ccc1C2=NC(=S)N=C2c3ccc(cc3)Br)Br	C01512229
Cc1cc2c(c(c1Cl)C)c(co2)CC(=O)N3CCCc4c3cccc4	C39892974
c1cc(cc(c1)Br)[C@H]2CN(CCO2)Cc3ccc(s3)Cl	C60320888
C[C@@H]1CC[C@H](c2c1cnn2c3ccccc3)C(C)C	C00387839
C1CC[C@@]23C=CC=C[C@]2(C1)CS(=O)(=O)[C@@H]3Cl	C05105849
c1cc(ccc1c2c(scn2)c3ccncc3)F	C13444986
CO[C@H]1CC[C@]2(C1)C[C@@H](CN2I)F	C39507297
c1ccc2c(c1)cccc2NC3(C(=O)c4ccccc4C3=O)O	C03147879
c1c(cc(cc1Cl)Br)c2c[nH]c(=O)[nH]c2=O	C00334579
C[C@H]1CC[C@H]2[C@@]([C@@]13CC[C@]4(O3)CCOC4)(CC[C@H]([C@@]2(C)CO)O)C	C00518402
Cc1c2c(n[nH]1)C[C@@]([C@H]([C@H]2c3ccccc3F)C(=O)C)(C)O	C19808823
c1ccc(c(c1)c2nnc3n2cc(cc3N)Br)F	C31863190
C[C@H](c1cccnc1)n2c3ccc(cc3nc2N)Br	C36899772
Cn1c(c(c(n1)c2ccco2)c3cccc(c3)Br)N	C37409263
c1cc(c(cc1N)Br)Oc2ccc3c(c2)OCO3	C43597690
Cc1c(n2c(nnc2s1)c3cccc(c3)N)c4ccccc4	C58021283
Cn1c(c(c(n1)c2ccccn2)c3ccc(cc3Cl)Cl)N	C61125720
Cc1c(c(c(s1)C)I)c2ccncn2	C00480745
Cc1ccc(cc1)n2c(c(c(n2)C)CCl)Cl	C36930294
c1ccc2c(c1)ncc(n2)I	C38241212
C1=C(S[C@H]2[C@@H]1SC(=C2Cl)C(=O)Cl)Cl	C39295416
C/C(=C/C#N)/c1cc2cc(ccc2o1)Br	C43559107
C1C[C@@]23CC=C([C@]2(C1)[C@H](C=C3C#N)Br)C#N	C44544665
Cc1c(nc(s1)Br)c2cccs2	C57546726
c1ccc(c(c1)C(=O)c2ccc(c(c2)[N+](=O)[O-])Sc3c(c(c(c(c3F)F)F)F)F)C(=O)[O-]	C13180970
CC[C@H](C)c1ccc(cc1)n2c(=O)c3ccc(cc3nc2SCc4c(cco4)C(=O)[O-])Cl	C13395234
CC(C)c1ccc(cc1)[C@H]2C(=C(C(=O)N2c3nccs3)[O-])C(=O)c4ccc(cc4)OC(C)C	C09065527
Cc1cc(ccc1C(=O)C2=C(C(=O)N([C@@H]2c3ccc(cc3)Br)CCCOC)[O-])OCC(C)C	C09123638
CC(C)(C)c1ccc(cc1)[C@@H]2C(=C(C(=O)N2c3nc4ccc(cc4s3)OC)[O-])C(=O)c5ccccc5	C09271528
CCc1ccc2c(c1)sc(n2)N3[C@@H](C(=C(C3=O)[O-])C(=O)c4ccco4)c5ccc(cc5)C(C)(C)C	C08894270
Cc1cc(c(c(=O)n1Cc2ccco2)[C@H](c3ccccc3)N4CCN(CC4)c5ccccc5F)[O-]	C21098076
c1ccc(cc1)CCN\2C(=O)[C@H](S/C2=N\c3ccc(cc3)C(=O)[O-])Cc4cccc(c4Cl)Cl	C39850793
CN(c1ccccc1C(=O)[O-])C2=NC(=O)/C(=C/c3ccccc3OCc4ccc(cc4)Cl)/S2	C39870001
Cc1ccccc1[C@H]2CC(=NN2C(=O)CCC(=O)[O-])c3c(nc4ccc(cc4c3c5ccccc5)Cl)C	C46085313
Cc1ccc(cc1)[C@@H]2CC(=NN2C(=O)CSc3nc(cc(n3)[O-])c4ccccc4)c5cccs5	C10186309
CN\1C(=O)/C(=C\c2ccc(c(c2)Br)OCC=C)/S/C1=N\c3cccc(c3)C(=O)[O-]	C59599999
CCCCCCOc1ccccc1[C@H](C(=O)[O-])Oc2ccc(cc2)Cn3c(nc4c3nccc4C)CCC	C29339924
c1cc(cc(c1)/C(=C\CCCCC(=O)[O-])/c2cccnc2)C3=N[C@H](CO3)C(=O)NCCCCC4CCCCC4	C29560509
CCCc1ccc(cc1)c2cnc(nc2/N=C(\C(F)(F)F)/[N-]S(=O)(=O)c3ccccc3)SC	C32620090
CCCCOc1ccc(cc1)[C@H]2C(=C(C(=O)N2c3nc4c(cc(cc4s3)C)C)[O-])C(=O)c5ccccc5	C33619783
CCN\1C(=O)/C(=C/c2cc(c(c(c2)Cl)OCC=C)OCC)/S/C1=N\c3cccc(c3)C(=O)[O-]	C35657149
CC1=C([C@@H](N2C(=CSC2=N1)/C=C(/N(C)C3CCCCC3)\[O-])c4ccc(cc4)C(C)C)C(=O)OCC=C	C36053257
CCCCCOc1c(cc(cc1Cl)C(=O)Nc2ccc(cc2)S(=O)(=O)[N-]c3nccs3)Cl	C39868989
Cc1ccc(cc1)COc2cccc(c2)C(=O)C3=C(C(=O)N([C@@H]3c4c(cccc4Cl)Cl)CC=C)[O-]	C40030388
CCCCOc1cccc(c1)[C@H]2c3c([nH]nc3C(=O)N2CCCOC(C)C)c4cc(ccc4[O-])Cl	C39899328
C/N=C\1/N([C@H](S[C@@H](S1)c2ccccc2)c3ccccc3)C	C04313919
c1ccc2c(c1)CCN([C@@H]2c3ccncc3)c4ccc(s4)Cl	C08436444
Cc1cc(c2c(c1)Cc3c(ccc4c3CCCC4)S2(=O)=O)C	C18194212
Cc1cc(nn1c2ccc(cc2Cl)Cl)CBr	C19045703
c1c(cc(n2c1ncc2F)Cl)I	C39463440
Cc1cc(cnc1N2CCc3ccccc3C2)Br	C42783644
c1cc(c(c(c1)F)F)[C@@H](c2ccc3c(c2)OCCO3)Br	C54214195
c1cc(c(c(c1)Cl)/C=C/C(=O)N2CCSCC2)Cl	C61960517
c1cc2c(cc1[C@@H](c3ccc(cn3)Br)Cl)COC2	C62335599
c1ccc2c(c1)CCN2C(=O)C34C[C@H]5C[C@@H](C3)CC(C5)(C4)Cl	C12907116
Cc1cccc(c1I)C(=O)N2c3ccccc3C[C@@H]2C	C31662664
c1c(cc(n2c1ncc2I)Cl)Br	C39463297
CCO[C@@H]1CC[C@@]2(C1)[C@@H](CCCN2I)Cl	C39513441
c1ccc(c(c1)[C@@H](c2ccc3c(c2)OCCCO3)Br)F	C40280510
c1ccc(cc1)C2=N[C@H]3[C@H](S2)SC(=N3)c4ccc(cc4)Cl	C41097531
c1cc2c(cc1Cl)N(C(=O)C2)Cc3c(ccs3)Br	C43678569
CN1C(=O)C(=Cc2ccc(s2)Br)C(=O)N(C1=S)C	C00105183
CN\1CCS/C1=C\C=C\2/C(=O)N(C(=S)S2)c3ccccc3	C05320021
Cc1ccn(n1)S(=O)(=O)c2ccc(cc2)I	C04867899
CC(C)(C)[C@H]1CC[C@H]2[C@@H](C1)OCCOCCOCCOCCO2	C06357389
CC(=O)[C@@H]1[C@H](C([C@H]2N1c3ccccc3C=C2)(C#N)C#N)c4ccsc4	C12437156
c1ccc\2c(c1)CN3C=CC=CC3=N/C2=N\C(=O)c4cccnc4Cl	C15906374
CC(=O)N1C=Cc2ccccc2[C@H]1CC(=O)N3CCc4c(ccs4)C3	C22597726
CCO[C@H]1[C@@H](CCC2=C3C(=NC=NC3=O)S[C@@H]12)Br	C39167724
Cc1c(c2c(n1OC)-c3c(c(ccn3)SC)C(=O)CC2)Br	C39458400
CC(C)S(=O)(=O)[C@H]1C[C@@]2(CC[C@@H](C2)Br)N(C1)F	C39505847
C1CO[C@H]2CS(=O)(=O)C[C@@H]2N1C(=O)C34CC5CC(C3)CC(C5)C4	C40625099
C[C@@H]1CN(C[C@H](O1)C)C[C@@H]2[C@H]3C[C@@H]4C(=C)CCC[C@]4(C[C@H]3OC2=O)C	C43735988
C[C@@]1(CC1(Cl)Cl)C(=O)N2CCCN(CC2)c3nccs3	C49142786
c1c(c(cc2c1OCCCO2)Br)[C@H]([C@@H]3COCCO3)Cl	C55304217
CC(=O)/N=C/1\N([C@@H]2CS(=O)(=O)C[C@@H]2S1)c3cccc(c3Cl)Cl	C04295679
Cc1c(nc2n1c3c(s2)CNCC3)c4ccc(cc4)F	C31978745
c1cc(cc(c1)I)c2cccc(n2)CO	C39927783
c1cc2c(cc1[C@H](c3ccc(cn3)Br)O)CCC2	C61870264
CN(c1nnc(s1)C23CC4CC(C2)CC(C4)C3)C(=O)c5ccc(cc5)Br	C08791271
CSc1ccc2c(c1)sc(n2)N3CCN(CC3)c4nc5c(cccc5s4)F	C08975463
c1cc(c2c(c1)sc(n2)N3CCN(CC3)c4nc5c(cc(cc5s4)F)F)F	C08975471
c1cc(oc1)C2=NN3[C@@H](C2)c4cc(ccc4O[C@@H]3c5ccc(cc5)F)Br	C25573042
Cc1ccc(cc1)C2=NC(=O)/C(=C/3\c4cc(ccc4N(C3=O)C)Br)/S2	C33319537
c1cc(cnc1)[C@H]2CCCCN2S(=O)(=O)c3ccc(cc3)S(=O)(=O)N4CCOCC4	C01088443
c1csc2c1c(ncn2)SCC(=O)N3CCN(CC3)Cc4cc(=O)n5ccsc5n4	C14228671
Cc1c(sc2c1c(ncn2)N3CCC(CC3)C(=O)N([C@@H]4CCS(=O)(=O)C4)N(C)C)C	C25050826
CCn1cc(c(=O)c2c1cc(c(c2)F)N3CCOCC3)c4nc(no4)c5ccc(cc5)OC	C33255986
CC1=C2C(=N[C@H]1C(=O)N3CCN(CC3)CC4=NC(=O)C5=C6CCCC[C@H]6SC5=N4)CCCC2=O	C39792980
c1cc(ccc1S(=O)(=O)N2CCN(CC2)C(=O)CCN3C(=O)[C@@H]4CC=CC[C@@H]4C3=O)Cl	C13987895
c1ccc(cc1)C2=C(CN=N2)C(=O)N3CCN(CC3)CC4=NC(=O)C5=C6CCCC[C@H]6SC5=N4	C64173301
Cc1cc(n(n1)c2cc(nc(n2)C)N3CCN(CC3)S(=O)(=O)c4ccc(cc4F)F)C	C65362115
Cc1ccc(c(c1)Br)NC(=O)CNC(=O)Cn2cnc3c(c2=O)c4c(s3)CCCC4	C02924714
CCCn1c(=O)c2ccccc2c(n1)C(=O)NNC(=O)c3ccc(cc3)I	C15947518
Cc1cc(ccc1NC(=O)CCNC(=O)Cn2cnc3c(c2=O)c4c(s3)CCCC4)Br	C20103518
C[NH+]1CCc2cc3c(c(c2[C@H]1c4c([nH]c(=S)n(c4=O)c5ccccc5Cl)[O-])OC)OCO3	C17124252
c1ccc2c(c1)CCC[C@H]2NC(=O)[C@@H]3CCCN(C3)S(=O)(=O)c4ccc5c(c4)CCCC(=O)N5	C20578796
CCn1c(=O)c2ccccc2c(n1)C(=O)NNC(=O)c3cc(ccc3I)Cl	C32476075
CN1CCN(CC1)S(=O)(=O)c2ccc(cc2)NC(=S)NC(=O)c3ccc(cc3Cl)Cl	C35681213
CC(C)S(=O)(=O)c1cc2c(c3c(n(c2=O)Br)C(=O)C[C@H](N3)c4ccccc4O)nc1	C39449464
c1ccc2c(c1)[C@H](CCS2)NC(=O)c3cccnc3SCC(=O)Nc4ccc5c(c4)OCO5	C39515671
c1ccc2c(c1)c(=O)n(c(n2)CS[C@@H]3[N-]C4=NC=NC(=[NH2+])C4=N3)c5c(cccc5Cl)Cl	C39776661
C[C@H]1C(=CN=N1)CNC(=O)C2CCN(CC2)C3=CC(=N[C@H]4N3NC(=C4)c5ccc(cc5)Cl)C	C64450454
Cc1ccc(cc1S(=O)(=O)N[C@@H]2CCCc3c2cccc3)c4c(nn5c4NC(=O)CCC5=O)C	C65011051
Cc1c2c(ncn(c2=O)CC(=O)c3cc4cc(ccc4o3)Br)sc1C(=O)OC	C09041267
c1ccc2c(c1)CCCN2C(=O)Cn3c4ccccc4nc3[C@H]5CC(=O)N(C5)C[C@@H]6CCCO6	C27755968
C[C@H](c1nc2ccccc2c(=O)n1C)N3CCN(CC3)S(=O)(=O)c4ccc(cc4)Br	C35032776
Cc1cc(c(c(c1)C)S(=O)(=O)N2CCN(CC2)[C@@H](C)c3nc4cc(ccc4c(=O)n3C)Cl)C	C35035625
Cc1ccc(c2c1nc(s2)N(C[C@H]3CCCO3)C(=O)[C@H]4CCCN4S(=O)(=O)C)Cl	C44359033
c1cc2c(cc1S(=O)(=O)N3CCN(CC3)C(=O)c4csc5c4CCCC5)OCCCO2	C09468258
c1cc(oc1)[C@@H]2CC(=NN2C(=O)Cn3cnc4ccc(cc4c3=O)Cl)c5cccs5	C11182927
Cc1cc(n2c(n1)nc(n2)SCc3nnc(o3)c4ccc(s4)Br)C	C18346531
c1ccc2c(c1)OC[C@@H](O2)C(=O)N3CCN(CC3)C(=O)c4csc(n4)c5ccc(cc5)Cl	C24354190
CCC(=O)OC1=C2[C@H](c3c(n(c(=O)n(c3=O)C)C)N=C2c4c1cccc4)c5ccccc5	C01322611
Cc1cccc(c1)n2c3c(cn2)c(=O)n4c(n3)SC[C@@H]4CC(=O)N5C[C@H](C[C@@H](C5)C)C	C36669498
c1cc(ccc1c2nc(on2)[C@H]3CC(=O)N(C3)Cc4ccc5c(c4)OCO5)Br	C38922221
COc1ccc(cc1)c2ccc3c(n2)sc(n3)N4CCC(CC4)C(=O)N5CCOCC5	C65272026
Cc1ccc2c(c1)c(=O)c3c(o2)C(=O)N([C@]34c5ccccc5N(C4=O)C)C[C@H]6CCCO6	C08917027
Cc1ccc2c(c1C)nc(s2)N3CCN(CC3)C(=O)[C@@H]4CCCCN4S(=O)(=O)C	C13793082
C[C@@H]1CCCN(C1)C(=O)[C@@H]2CCCN(C2)c3cccc4c3C(=O)N(C4=O)Cc5nccs5	C14997996
Cc1c(cnn1c2ccc(cc2)Br)C(=O)N3CCC[C@@H]3c4nnc5n4cccc5	C26555977
Cc1cc(c(n1c2cccnc2)C)/C=C/3\C(=O)N(C(=S)S3)c4ccc(cc4)[N+](=O)[O-]	C08689987
CC(C)(C)C(=O)N1CCC(CC1)C(=O)N2CCN(CC2)c3ncc(cn3)Br	C46775293
c1ccc2c(c1)c(cs2)c3cc4c(c(c3)O[C@H]5CCOC5)OCCN(C4)C(=O)c6ccoc6	C14982809
C[C@H]1CC(=O)c2c1c(ccc2OC(=O)C3CCN(CC3)S(=O)(=O)c4ccc5c(c4)CCC5)F	C24222189
Cc1c(c(=O)n(n1C)c2ccccc2)N3C(=O)/C(=C\4/CN(c5c4cccc5)C)/SC3=S	C25763933
c1ccc(cc1)CN2CCC3=C4C(=NC(=NC4=O)CS(=O)(=O)c5ccccc5)S[C@H]3C2	C39312350
Cc1cc(c(n1c2cccc(c2Cl)Cl)C)/C=C/3\C(=O)N(C(=O)N(C3=O)c4ccccc4)C	C59138823
Cc1nc2c(s1)ccc3c2sc(n3)NC(=O)[C@@H]4CCCN4S(=O)(=O)c5ccc(cc5)Cl	C08928296
c1ccc(cc1)n2cc(c(n2)c3cc4ccccc4oc3=O)/C=C\5/C(=O)N(C(=S)N5)c6ccccc6	C12558358
COc1ccc(cc1OC)[C@H]2CC3=C([C@H](n4c(ncn4)N3)c5ccc(s5)Br)C(=O)C2	C18198524
Cc1cccc(c1NC(=O)C2CCN(CC2)c3c4c(c(nn3)C)c(n(n4)c5ccc(cc5)Cl)C)C	C20564381
Cc1nc2ccccc2c(=O)n1c3ccc(cc3)C(=O)Nc4ccnn4Cc5ccc(cc5)Cl	C21601305
Cc1c(sc(n1)N2[C@H](c3c(=O)c4cc(ccc4oc3C2=O)Br)c5ccc(cc5)O)C(=O)C	C35512724
C[C@@H](C(=O)NC1CCCCC1)Sc2nc-3nn(c(=O)c3c4n2CCCCC4)c5ccccc5	C21681688
CCOc1cc(ccc1O)[C@@H]2c3c(=O)c4ccc(c(c4oc3C(=O)N2c5nc(c(s5)C)C)C)C	C40064188
[H]/N=C\1/C(=C/c2cccn2c3cccc(c3C)C)/C(=O)N=C4N1N=C(S4)COc5ccccc5C	C41108317
Cc1ccc(c(c1)C)NC(=O)Cn2c3c(c(=O)n(c2=O)c4ccccc4C)sc(n3)SC	C65100688
c1ccc2c(c1)c(cc(n2)c3ccc4c(c3)OCCO4)C(=O)O[C@@H]5CCOC5=O	C32666164
c1cc(oc1)c2nnc(o2)C3CCN(CC3)S(=O)(=O)c4ccc(s4)Cl	C35597682
Cc1c(cccc1[N+](=O)[O-])C(=O)N2CCN(CC2)C(=O)[C@H]3C[C@@H]3c4cccs4	C38727922
c1ccc2c(c1)ccn2CC3=C[C@@H](N=N3)C(=O)N4CCC(CC4)N5CCOCC5	C39532353
Cc1c(nc2nc(=S)n(n2c1C)CN3CCN(CC3)c4ccccc4OC)C	C54421453
Cc1cnc(nc1c2cccs2)n3c(c(cn3)C(=O)N4CCN(CC4)C(C)C)C	C55035778
Cn1c(=O)c2c3c(sc2nc1SCC(=O)N4[C@H](CC(=N4)c5cccs5)c6ccco6)CCC3	C09137403
c1cc(ccc1CCC(=O)N2CCC[C@H]2c3ccc4c(c3)OCCCO4)S(=O)(=O)N5CCCC5	C13986942
COc1ccc(c(c1)OC)/C=C/C(=O)N2CCN(CC2)S(=O)(=O)c3ccc(c(c3)Cl)Cl	C15930783
Cc1c(sc2c1c(nc(n2)CN3CCOCC3)N4CCN(CC4)Cc5nc6ccccc6s5)C	C24001787
c1cc(ccc1S(=O)(=O)N2CCN(CC2)Cn3c(=S)n4cc(cc(c4n3)Cl)Cl)Cl	C25266451
Cc1c(sc(n1)C)c2nnc(o2)SCC(=O)N3[C@@H](CC(=N3)c4cccs4)c5cccs5	C25459381
C[C@H](C(=O)N1CCN(CC1)c2ccccc2)N3CCN(CC3)S(=O)(=O)c4ccc5c(c4)CCCC5	C14922081
CN1[C@@H]([C@H](c2cc(c(cc2C1=O)OC)OC)C(=O)N3CCN(CC3)c4ccccc4)c5cccs5	C04760063
C=CCOc1ccc(cc1)[C@@H]2c3c(=O)c4cc(ccc4oc3C(=O)N2[C@@H]5CCS(=O)(=O)C5)Cl	C38648716
Cc1c(sc2c1c(nc(n2)CN3CCOCC3)SCC4=NC(=O)C5=C([C@H](SC5=N4)C)C)C	C39462437
Cc1ccc(cc1)C2=NN([C@@H](C2)c3ccco3)C(=O)CN(C)S(=O)(=O)c4ccc5c(c4)OCCO5	C09507427
COc1ccc(cc1)S(=O)(=O)CC(=O)N2CCN(CC2)c3nc4c(ccc(c4s3)Cl)OC	C10515151
Cc1c(c(on1)C)S(=O)(=O)N2CCN(CC2)c3c4c(cc(s4)c5ccc(cc5)OC)ncn3	C12568013
c1cc2c(cc1N3C[C@@H](CC3=O)C(=O)N4CCN(CC4)c5ccc(cc5[N+](=O)[O-])Cl)OCCO2	C18042420
CCC(=O)N1CCN(CC1)c2nc3c(n2Cc4ccc(cc4)Br)c(=O)n(c(=O)n3C)C	C21315039
Cn1c(nnc1SCC(=O)N2[C@@H](CC(=N2)c3ccco3)c4ccco4)[C@@H]5COc6ccccc6O5	C32861056
Cc1ccccc1Cn2c(=O)c(nn(c2=O)c3ccc(cc3)C(C)C)C(=O)N4CCN(CC4)C(=O)C	C36088064
Cc1ccc2nc(c(n2c1)CC(=S)N)c3cccs3	C31921951
c1cc(c(cc1C(=O)N2CCc3c(ccs3)C2)N)Br	C40292567
c1cc(ccc1F)[S@@](=O)Cc2ccc(cc2Br)N	C40962411
c1ccc(c(c1)CO)NC(=O)c2cc3c(s2)CCCC3	C42272377
C[C@H](c1ccccc1NC(=O)c2cc3c(s2)CCC3)O	C49549649
c1ccc2c(c1)CC[C@H](C2)[NH2+]C3(CCCCCC3)C(=O)[O-]	C51634146
C[C@H]1c2ccsc2CCN1C(=O)c3cccc(c3N)F	C54209226
Cc1c(c(n(n1)[C@@H]2CCCSC2)N)I	C61589784
c1ccc2c(c1)nc(s2)/C(=C/c3cc(cc(c3O)Cl)Br)/C#N	C05171456
c1ccc(c(c1)c2nc3ccccc3s2)NC(=O)c4ccc5c(c4)CCC5	C08395534
c1ccc2c(c1)CCCN2C(=S)NC(=O)c3ccc(cc3Cl)Cl	C12495428
c1ccc2c(c1)cc(s2)C(=O)Nc3nc(cs3)c4ccc(c(c4)F)F	C12620701
CC(=O)N(C)c1ccc2c(c1)[C@H]3C=CC[C@@H]3[C@@H](N2)c4c(cccc4Cl)Cl	C14546547
Cc1ccc2c(c1)cc(c(n2)C)C(=O)Nc3ccc(cc3Cl)Br	C22020308
c1cc(c(cc1Br)F)CNc2c(ccc3c2ncs3)Cl	C36923222
c1ccc(c(c1)N2[C@@H](CCC[C@@]23CCC[C@@H](C3)I)F)O	C39521394
CCON1[C@H](CCC[C@@]12CCC[C@@H](C2)Br)c3ccccc3O	C39526408
c1cc(c(cc1Br)/C=N/c2c(cc(cn2)Cl)Br)O	C03082661
c1cc(c(c(c1)Cl)NC(=O)c2cnccn2)Cl	C00435885
Cc1nc(co1)C(=O)Nc2cc(cc(c2)Cl)Cl	C22538155
c1cc(oc1)c2[nH]c(=O)c3c4c(sc3n2)CCCC4	C18325255
c1c(snn1)C(=O)NC23CC4CC(C2)CC(C4)C3	C47415794
[H]/N=C\1/C=C[C@@H](S1)c2nc(no2)[C@@H]3CCC[C@@H](C3)C	C44978273
Cc1ccc(cc1)S(=O)(=O)/N=C/2\CCCCCN2	C05574377
Cc1nc2ccccc2n1NC(=O)[C@@H]3C[C@H]4CC[C@@H]3C4	C63477906
Cc1ccc(c(c1)C)NC(=O)c2cc3n(n2)CCCC3	C64542611
Cc1ccccc1N2C(=O)c3ccccc3[C@]2(c4ccccc4)O	C01425964
Cc1cc2ccccc2n1C(=O)c3c([nH]c4c3cccc4)C	C03200869
C[C@H]1CC[C@H](c2c1c(c3ccccc3[nH+]2)C(=O)[O-])C(C)C	C21799508
c1ccc(cc1)c2c(c(=O)[nH]c(n2)c3ccccc3)Cl	C17111945
C[C@@H]1Cn2c3c(cccc3N(C1)CC=C(C)C)[nH]c2=S	C05550930
c1ccc2c(c1)c3cc(ccc3o2)[C@H](c4ccn[nH]4)Cl	C62778879
Cc1ccc2c(c1)sc(n2)NC(=O)c3ccccc3C	C01518142
CCOc1ccc(cc1)[C@H]2CC(=O)Nc3c2c(=O)nc4n3ccs4	C04722079
Cc1ccc(c(c1)C)n2c(c3c(n2)CS(=O)(=O)C3)NC(=O)C4CC4	C00425824
C[C@@H]1CCc2c(sc(n2)NC(=O)c3ccnc(c3)n4ccnc4)C1	C48223119
c1ccc(c(c1)[C@H]2C3=C(CCCC3=O)Nc4n2ncn4)OC(F)F	C00223040
Cc1cccc2c1N(C(=O)[C@]23CC(=Nc4c3cnn4c5ccccc5)O)C	C32096964
COC(=O)[C@H]1Cc2c(nc[nH]2)CN1C(=O)c3c4c(cs3)CCCC4	C65386959
c1ccc(cc1)[C@@]2(CCN(C2)c3ncc(c(n3)N4CCOCC4)F)O	C65534700
c1ccc2c(c1)O[C@H](CS2)C(=O)Nc3cccnc3n4cccn4	C65610327
c1ccnc(c1)NC(=O)c2csc(n2)c3ccc4c(c3)OCCO4	C66820811
Cc1c(nc2c(c(nn2c1N3CCC(CC3)O)C)c4ccc(cc4)F)C	C05000317
Cc1c2cc(cnc2on1)C(=O)NCc3cc(cs3)Br	C48754069
c1cc(sc1)C(=O)N2CCC[C@H]2C(=O)Nc3nc4c(s3)CCCC4	C01238685
c1cc2nc(cn2cc1Cl)CNC(=O)c3cc(cnc3)Br	C41789328
c1ccc-2c(c1)Cc3c2nc(s3)NC(=O)C4CCCCC4	C04224085
CC(C)(c1ccccc1N2c3ccccc3Oc4c2cccc4)O	C05481639
Cc1c(sc2c1c(ncn2)Nc3cccc(c3C)Cl)C	C06473974
Cc1ccc(c(c1)C)NC(=O)c2cc3ccc(cc3nc2C)C	C33145366
c1cc(c(cc1Br)Cl)Nc2c(nsn2)Cl	C37372292
CC(C)(C)c1csc2c1c(=O)[nH]c(n2)c3ccc(cc3)Cl	C41627569
c1cc(c(cc1Br)Cl)c2ccc(o2)/C=N/O	C20154458
c1ccc(c(c1)/N=C/2\NC(=O)/C(=C/c3cccs3)/S2)Cl	C17887622
Cc1cc(cc(c1O)C)/C=N/N2CCOCC2	C00434747
Cc1ccnc(c1)NC(=O)c2cc(ccn2)Cl	C27993862
C[C@@H]1c2c(n3c(s2)nc(n3)C(C)C)CCN1	C28429619
c1cc2c(cc1[N+](=O)[O-])c(c[nH]2)Br	C33426806
C[C@H](c1ccccc1)N2C(=O)OC([C@@]2(C)O)(C)C	C00090613
c1ccc(cc1)n2cc3c4ccccc4[nH]c(=O)c3n2	C03888482
C[C@H]1CCCC[C@H]1N(C)C(=O)NC(=O)CCl	C53674491
Cc1cccc(c1)Nc2cc(nc3n2ncc3)C	C64543382
c1ccc2c(c1)c3ccn4c(c3[nH]2)cc5cnccc5c4=O	C01866103
Cc1ccc2c(c1)c(c(o2)C(=O)Nc3nccs3)C	C09910717
c1cc(ccc1c2nnc(n2C3CCCCC3)S)O	C15922035
C1CCC2(CC1)[C@@H]3CCCCC3=NC(=C(N2)C#N)C#N	C20366274
c1cc(c(cc1Cl)Cl)c2ccnc(n2)NC#N	C32096408
Cc1c([nH]n2c1nc(cc2=O)c3ccccc3)c4ccccc4	C13470557
c1cc(sc1)c2nnc3n2N[C@@H]4CCCC[C@H]4S3	C36152405
c1cc(oc1)C(=O)Nc2nc3c(s2)CCCCCC3	C48925948
Cc1nc(cs1)CC(=O)/N=c/2\[nH]c3ccccc3s2	C49937084
Cn\1ccs/c1=N\C(=O)c2c(cccc2Cl)O	C57306528
c1ccc-2c(c1)Cc3c2ccc(c3)NC(=O)c4cnccn4	C15565839
Cc1ccccc1[C@@H]2C[C@@H](Nc3n2ncn3)c4ccccc4	C13131666
CC1=C2[C@@H](SCC(=N[C@H]2N=N1)O)c3ccc(cc3)C(C)C	C63795882
CN1C(=O)/C(=C/c2cc(ccc2O)Cl)/SC1=S	C02566804
c1ccc(cc1)C#CCNC(=O)[C@H]2Cc3ccccc3O2	C12980227
c1ccc(c(c1)NC(=O)c2ccoc2)I	C16200180
CCc1n[nH]c(=S)n1c2ccc(cc2F)Br	C20589365
Cc1n[nH]c(=S)n1[C@H](C)C23CC4CC(C2)CC(C4)C3	C20589610
C1CCN([C@H](C1)CO)C(=O)C23CC4CC(C2)CC(C4)C3	C35207330
CO[C@@H]1CC[C@@]2(C1)[C@@H](CCCN2F)c3ccccc3O	C39511019
CN1c2ccccc2[C@@H](CC1=O)Nc3cccc(c3F)F	C40230415
c1c(csc1CN2CCC(=NO)CC2)Br	C43687535
CC1(CCCC1)NC(=O)c2cc(cnc2)Br	C49123621
Cc1c(c(n(n1)c2ccc(cc2)[C@H](C)O)C)Br	C50593574
CCc1ccc(cc1)[C@H]2C3=C(C[C@@H](CC3=O)c4cccs4)Nc5ccccc5N2	C01077348
CCc1ccc(cc1)c2nc3c(o2)cc(c(c3Br)N)Br	C02422339
CC(C)Oc1cccc2c1N[C@@H]([C@@H]3[C@@H]2C=CC3)c4cc(ccc4O)Br	C14461218
CC(C)Oc1cccc2c1N[C@@H]([C@H]3[C@@H]2C=CC3)c4cc(ccc4O)Br	C14461220
c1ccc(cc1)NC(=O)c2cccc3c2N[C@H]([C@@H]4[C@@H]3C=CC4)c5ccc(cc5)Cl	C14464882
CC(C)Oc1cccc2c1N[C@@H]([C@H]3[C@H]2C=CC3)c4cc(ccc4O)Br	C20696397
CNC(=O)c1cccc2c1N[C@@H]([C@H]3[C@H]2C=CC3)c4c5ccccc5cc6c4cccc6	C20753772
c1cc(ccc1CSc2ccc(cc2N)Br)Br	C37205773
Cn1c(c(c(n1)c2ccc(s2)Br)c3ccc(cc3Cl)Cl)N	C37351862
c1cc(c(cc1Br)Cl)NCc2cc(cc(c2O)Cl)Cl	C37392228
c1cc2c(cc1F)sc(n2)c3cc(cc(c3N)Br)Br	C45920018
c1cc(c(c(c1)Br)O)CNc2c(cc(cc2Br)F)F	C48795573
c1ccc2c(c1)C(=O)C(=C(C2=O)Br)CCCCl	C02306163
CO[C@@H]1CC[C@@]2(C1)C[C@@H](CN2I)SC	C39507194
CCO[C@@H]1CC[C@@]2(C1)C[C@@H](CN2I)F	C39507302
CC1(CC(=O)N(C(=O)C1)Cc2cc(cs2)Br)C	C61828367
CCOc1cccc(c1)[C@H]2C3=C(C[C@H](CC3=O)c4ccccc4)Nc5ccccc5N2	C00630956
CC1(CC2=C([C@H](Nc3c2c4ccccc4cc3)c5c[nH]nc5c6ccccc6)C(=O)C1)C	C00886068
C[C@H](c1c2c(sc1n3cccc3)CCCC2)NC(=O)Nc4ccccc4Cl	C06768662
Cc1ccc(n1c2ccsc2c3cc4ncc(c(n4n3)N)c5ccc(cc5)Cl)C	C02384367
Cc1ccc(cc1Br)[NH+]=c2c3ccc(c(c3[nH]cc2C(=O)[O-])C)Cl	C19793881
c1ccc2c(c1)ccc(c2[C@H]3[C@@H]4CC=C[C@H]4c5cccc(c5N3)OC[C@H]6CCCO6)O	C20752244
CC(C)Oc1ccc(cc1)[C@H]2CC3=C([C@@H](Nc4ccccc4N3)c5ccc(cc5)F)C(=O)C2	C21251848
C/C(=C/1\C(=O)N(/C(=N\c2ccncc2Cl)/S1)C3CCCCC3)/c4cccc(c4)N	C39864654
Cc1c(c2ccccc2[nH]1)/C=C\3/C(=O)N/C(=N\c4cccc(c4Cl)Cl)/S3	C59567016
Cc1ccccc1N2C(=O)C(=C(C2=O)Cl)Nc3ccc(cc3)I	C00949115
c1ccc(cc1)NN2C(=N/C(=C/c3ccc(cc3)Br)/C2=O)c4cccs4	C00709066
Cc1ccc(c(c1)Cn2cc(ccc2=O)C(=O)Nc3ccc(cc3C)Br)C	C09548288
Cc1ccc2c(c1)c(cc(n2)C)SCC(=O)N/N=C/c3ccc(cc3)Br	C06281452
c1ccc(c(c1)[C@H]2CC(=NN2C(=O)c3cccs3)c4ccc(cc4)Br)O	C13895782
CC(=O)Oc1ccc(cc1OC)[C@H]2[C@H]3CC=C[C@@H]3c4c(c(cc(c4Cl)Cl)Cl)N2	C14468557
CCc1ccc(cc1)N2C(=O)C3=C(C2=O)Sc4ccccc4N[C@H]3c5ccc(cc5)F	C17096923
c1ccc2c(c1)c(c[nH]2)c3nnc(n3C4CC4)SCc5ccc(cc5)Br	C17881397
c1ccc(cc1)c2cc3c(s2)[nH]c(nc3=O)CN4CCc5c(ccs5)[C@H]4c6cccs6	C15548802
c1ccc2c(c1)C[C@@H]([C@H]3N2CCN(C3)c4ccccc4F)C(=O)NCCc5cccs5	C35893619
C[C@H](Cc1nnc(s1)NC(=O)c2ccccc2I)c3ccccc3	C59342011
Cc1nnc(s1)NC(=O)c2ccccc2Br	C16971373
c1coc2c1[nH]c(c2)C(=O)N3CCC4(C3)SCCS4	C42750394
c1ccc2c(c1)[C@@H](CCO2)NC(=O)c3c(ncs3)Cl	C47207486
CC1(CN(CCO1)c2c(cc(cn2)Br)CO)C	C50043045
Cc1ccc(c(c1)Br)[NH+]2CCC(=C2[O-])C(=O)[O-]	C54917900
c1cc2c(cc1[C@@H]([C@@H]3COCCO3)Cl)CCCC(=O)N2	C55304302
c1ccc2c(c1)ccc(n2)c3c[nH]nc3c4ccncc4	C01502452
Cc1c(cno1)C(=O)Nc2cc(cc(c2)Cl)Cl	C04667752
CN1c2ccc(cc2CC1=O)NC(=O)c3cccs3	C08803790
CN1C(=O)/C(=C/c2c[nH]c3c2cccc3)/N=C1SC	C02127209
c1ccc(c(c1)/C=C/C(=O)N2CCNC(=O)C2)Br	C24062893
C1C=C(C=NC1=O)C(=O)NC23CC4CC(C2)CC(C4)C3	C39570701
c1cc2c(cc1c3nc4c(s3)CCCN4)OCCO2	C41411114
C1C[C@H](OC1)Cc2[nH]c(=O)c3c4c(sc3n2)CSCC4	C48412384
CS(=O)(=O)c1ccc2c(c1)nc([nH]2)c3ccccc3	C50227509
CCN1C(=O)/C(=C\c2cn(c3c2cccc3)CC#C)/NC1=O	C04678257
CCC1([C@H]2NC(=O)[C@@]1(C(C(=N2)Br)C#N)C#N)CC	C04784751
c1cc(sc1)[C@@H]2c3ccsc3CCN2C(=O)C4=NNC(=O)CC4	C32781481
C[C@@H]1C[C@H](CN(C1)S(=O)(=O)c2cc(cnc2)C#CCO)C	C44245088
Cc1nnc2n1C[C@@H](CC2)NC(=O)c3cc4c(s3)CC[C@H](C4)C	C62640116
CC(=O)N1CCCSc2c1cc(cc2)S(=O)(=O)NC	C35504574
c1cc(ccc1n2cnc3c2[C@@H](CC(=O)N3)c4ccncc4)F	C66091728
CCc1c([nH+]n(c1N)[C@H]2CCS(=O)(=O)C2)c3c(ccs3)C	C36916446
c1cc2c(cn[nH]2)c(c1[C@@H](CC[NH+]3CCC(=O)CC3)O)Cl	C41165711
CCc1ccc(s1)c2cc(n([nH+]2)[C@@H]3CCS(=O)(=O)C3)N	C43640141
c1csc2c1c(nc(n2)CN3CC[C@@H](C3)[NH+]4CCCC4)N	C62969511
c1cc(sc1)C(=O)NNC(=O)C[NH+]2CC3C[C@H]4C[C@@H](C3)CC2C4	C65968079
Cc1c2c([nH]c1C(=O)NC[C@@H](C)[NH+]3CCC(CC3)C)CCCC2=O	C67272086
Cc1c(c(=O)[nH]c(n1)C)CC(=O)N2CCc3c(ccs3)C2	C31263947
c1cc2c(cc1/C=C/C(=O)N3CCC(CC3)O)OCO2	C35187480
C1CC[C@H]2[C@@H](C1)CCCN2S(=O)(=O)N3CCNCC3	C36827309
C1CC[C@H]2[C@H](C1)N(CCO2)c3n[nH]c(=S)n3C4CC4	C43426849
c1cc2c(cc1C(=O)N3CCO[C@H]4[C@@H]3CCC4)nc[nH]2	C43429022
C[NH+]1CC[C@H](C1)C(=O)N2CCc3c(ccs3)[C@@H]2C(=O)[O-]	C44591898
Cc1c(c(n(n1)CC(=O)/N=C\2/NCCS2)C)Cl	C47304857
c1csc2n1c(c(n2)Cl)/C=C/C(=O)N3CC[C@H](C3)O	C61705431
Cc1c(c([nH]c1C(=O)N(C)[C@H]2CCS(=O)(=O)C2)C)C(=O)C	C09549637
Cc1c(nc(s1)n2cccc2)C(=O)N[C@H]3CS(=O)(=O)C=C3	C11866089
CCn1cc(c(=O)c2c1cc(cc2)c3ccncc3)C(=O)N(C)O	C05848268
CS(=O)(=O)N1CCCC[C@@H]1C(=O)Nc2nc3c(s2)CCC3	C13792601
Cc1c(c(on1)C)S(=O)(=O)N[C@@H]2CCOc3c2cccc3	C24977444
c1cc(cnc1)C2=NO[C@H](N2)[C@H]3C=C(N=N3)c4ccc(cc4)F	C39587900
Cc1ccn(n1)c2ccc(cc2)C(=O)N[C@H]3CCS(=O)(=O)C3	C40529727
C1CCCC(CC1)(C#N)NS(=O)(=O)C2CCS(=O)(=O)CC2	C50351287
C1CCC(CC1)N2C[C@@H](CC2=O)C(=O)N[C@H]3CCS(=O)(=O)C3	C62088837
Cc1nc2c(ccs2)c(=O)n1NC(=O)/C=C/c3cscn3	C64897171
c1ccc2c(c1)CC[C@@H]2NC(=O)C3=CN4CCS(=O)(=O)N=C4C=C3	C16472251
c1cc(c(cc1/C=N\n2c(n[nH]c2=S)c3ccncc3)Cl)Cl	C01249009
c1ccc(c(c1)n2c3c(cn2)CN(CC3)C(=O)c4ccc5cc[nH]c5c4)Cl	C28708546
Cc1c(cnn1C)Cn2c(=O)c3c4c(sc3[nH]c2=S)C[C@H](CC4)C	C17074315
Cc1cc(=O)n2c(n1)SC[C@@H]2CC(=O)N[C@H]3C[C@@H](CC(C3)(C)C)C	C38755483
Cc1cc(c2c(n1)n3c(n2)CCCCC3)C(=O)Nc4cc(cc(c4)F)F	C39553524
c1c(cc(c2c1OCO2)Br)CNc3cncc(n3)Cl	C49100045
Cc1ccc(c(c1)C)S(=O)(=O)N2CC(C2)c3[nH]c4ccccc4n3	C56924232
Cc1cc(c2ccccc2n1)C(=O)N[C@H]3CCCc4c3cnn4C	C24985692
c1cc(sc1)[C@@H]2CSc3nnc(n3N2)[C@H]4CCCO4	C36153495
C1CC[C@H]([C@@H](C1)C(=O)N2CC[NH+]3CCCC[C@@H]3C2)C(=O)[O-]	C37831716
c1cc2c(cc1/C=C\3/C(=O)NC(=O)S3)OC(O2)(F)F	C33821235
Cc1ccc2c(c1)sc(n2)NC(=O)[C@H]3CSCN3C(=O)C	C48354207
Cc1ccc(s1)c2cc(c3c(noc3n2)C)C(=O)NC	C48689154
c1ccc(c(c1)/C=C/c2ccccc2S(=O)(=O)[O-])S(=O)(=O)[O-]	C03844587
Cc1c(c(sn1)[N-]S(=O)(=O)CCC(=O)OC)C(=O)[O-]	C49063182
C1COCCC1S(=O)(=O)[N-]c2nnc(s2)SCC(=O)[O-]	C50199523
c1cc(ccc1N/N=C\2/C(=O)NC(=O)N=C2[O-])S(=O)(=O)[O-]	C18996456
C[C@@H](C(=O)[O-])N(C)C(=O)Cc1csc(n1)[N-]S(=O)(=O)C	C54051632
Cc1c(c(nc(n1)[O-])SC)C(=O)N[C@@H](C2CC2)C(=O)[O-]	C54503164
CC[C@@H](C)[C@H](C(=O)[O-])NC(=O)c1c(nc(nc1SC)[O-])C	C37448608
c1c(c2c([nH]c1=O)nc(s2)SCC(=O)NCC(=O)[O-])[O-]	C19200253
c1ccc2c(c1)cc(c(=O)[nH]2)/C(=N/c3[n-]nc(n3)c4ccccn4)/[O-]	C44944172
CCc1nc(c(c(n1)S[C@H]2CC(=NC2=O)[O-])C(=O)[O-])C	C36854422
CC(C)n1cc(cn1)NC(=O)N[C@@H](CCC(=O)[O-])C(=O)[O-]	C61684093
Cc1cccc(c1NC(=O)Cn2cnc3c(c2=O)cnc(n3)SC)C	C12462941
CC(C)n1c2c(cn1)c(cc(n2)c3cccs3)C(=O)N4CCNC(=O)C4	C28622940
C[C@@H]1CCc2c(sc3c2c(ncn3)OCC(=O)N4CCNC4=O)C1	C39561844
CC(=O)Nc1cccc2c1CCN(C2)Cn3c(=S)n(nn3)C(C)(C)C	C54572082
Cn1ccc(n1)NC(=O)[C@@H]2CCCN(C2)S(=O)(=O)c3cccs3	C58246200
Cc1cccc2c1ncn(c2=O)CC(=O)Nc3nc4c(s3)CN(CC4)C	C24152642
Cc1c(c(n(n1)C)C)[C@H](C)C(=O)Nc2nnc(s2)c3ccccn3	C65624744
Cc1c(c(n(n1)C)C)[C@H](C)NC(=O)c2csc(n2)c3ncccn3	C67303354
CC1=C([C@@H](NC(=O)N1C)c2ccc(cc2)Cl)C(=O)OCCC(C)C	C00727712
Cc1c(sc2c1c(=O)[nH]c(n2)[C@@H](C)OC(=O)CCCC3CCCCC3)C	C04252146
CCCCOC(=O)c1c(c2c([nH]1)C[C@@H](CC2=O)c3ccc(cc3)N(C)C)C	C04794608
CCc1ccc(cc1)NC(=O)[C@H](C)Sc2nnc(o2)c3ccccc3C	C05434761
CCC(CC)c1nc(c(o1)N/N=C/c2c(cccc2Cl)Cl)C#N	C07260778
CCCCSc1nnc(s1)NC(=O)[C@H](C)Oc2cccc(c2C)C	C39989243
C[C@H](C(=O)NCCc1ccc2c(c1)OCO2)Oc3cccc(c3)C(C)(C)C	C46912404
CCc1cc(cc(c1)OCC(=O)N/N=C/c2cccn2c3ccccc3)C	C59302263
CCn1c(nnc1SCC(=O)NC(C)(C)C)c2ccc(cc2)C(C)(C)C	C10408420
CC(C)[C@@H](C(=O)OCc1cc(sc1)Br)NC(=O)OC	C66730062
Cc1ccccc1n2c(nnc2SCc3ccc(cc3)Cl)c4cccnc4	C02618843
CCc1cc2ccc(cc2nc1SCc3nnc(o3)c4ccc(cc4)C)C	C04848632
Cc1ccc2c(c1)sc(n2)N(C[C@H]3CCCO3)C(=O)c4ccc(cc4)C(C)(C)C	C11066211
CCc1ccc(cc1)N(CC)C(=O)c2cc3cc4cc(ccc4nc3s2)OC	C04900882
CC(C)(C)c1ccc(cc1)/C=C/C(=O)N2CCC(CC2)c3nc4ccccc4o3	C27580553
Cc1cccc(n1)/N=C/2\N(C(=O)/C(=C/C(=C/c3ccccc3)/Cl)/S2)CC=C	C39863483
CCOc1ccc(cc1)c2c(sc3c2c(nc(n3)C)N4C[C@H](C[C@@H](C4)C)C)C	C62046732
Cc1ccc(c(c1)C)c2nnc(o2)SCc3csc(n3)c4ccsc4	C66260425
c1cc(ccc1Sc2ccc(cc2[N+](=O)[O-])/C=C/C(=O)[O-])Br	C02555759
C#CCOc1ccccc1/C=C(\CC(=O)[O-])/c2nc3ccccc3s2	C06787898
CCCOc1ccc(cc1Br)[C@H]2[C@H](Oc3ccccc3O2)C(=O)[O-]	C11861460
c1ccc(cc1)/C=C/S(=O)(=O)Oc2ccc(cc2Br)C(=O)[O-]	C13463444
Cc1ccc(cc1)S(=O)(=O)Oc2c(cc(cc2Cl)Cl)/C=C/C(=O)[O-]	C44214446
Cc1c(c(on1)C)c2ccc(cc2)S(=O)(=O)[N-]c3ccc(cc3)C(F)(F)F	C64837786
CC(C)Cc1ccc(cc1)S(=O)(=O)[N-]c2nc3c(s2)C(=O)CCC3	C66255216
c1ccc2c(c1)ncc(n2)/C=C/c3c(cccc3Cl)Cl	C04323405
c1ccc2c(c1)nc(s2)Sc3nc4ccccc4s3	C00400028
c1ccc(cc1)C(c2ccccc2)(c3ccccc3)n4cccn4	C22016515
C[C@@H]1CCC[C@H]([C@@H]1C)n2c3ccccc3nc2CCCl	C36910077
c1cc(cc(c1)F)CSc2ncc(o2)c3ccc(cc3)F	C58522255
CCc1c(c2cccc3c2n(c1=O)c4c3cccc4)Cl	C02551887
C[C@H]1CC(=C[C@H]([C@@H]1[C@@H]2O[C@@H](CC(O2)(C)C)C)C)C	C04094035
Cc1ccc(c(c1)N2Cc3c4ccccc4ccc3OC2)C	C03636132
c1ccc(cc1)c2ccc(cc2)/C=C/c3nc4ccccc4o3	C04257217
Cc1c2ccccc2sc1/C=C/c3ccnc(n3)SC	C04365905
c1ccc2c(c1)nc(s2)Oc3cc(cc(c3)Cl)Cl	C00480206
Cc1coc2c1ccc3c2C=C[C@@](O3)(C)CCC=C(C)C	C01580150
C[C@H]1CC[C@H]([C@H](C1)OC(=O)C#Cc2ccccc2)C(C)C	C13405483
Cc1ccc2c(c1)nc(n2c3ccc(cc3F)C)CCl	C36898133
CCCn1c2ccccc2nc1c3ccc(cc3C)C	C40210676
c1cc(ccc1Cc2nc3cc(ccc3o2)Br)F	C41569850
C[C@@H]1CCc2c(sc(c2C#N)/N=C/c3ccccc3)C1	C00295570
CCNc1c2c(n(n1)c3nc(cc(n3)C)C)C[C@@H](CC2=O)c4ccc(cc4)F	C09936504
CCNc1c2c(n(n1)c3nc(cc(n3)C)C)C[C@H](CC2=O)c4ccc(cc4)F	C09936510
Cc1c(c(no1)c2ccccc2Cl)C(=O)Nc3cccc(c3)n4cccn4	C19718281
Cc1c(c(no1)C(=O)N2CCc3c4ccccc4[nH]c3[C@@H]2C(C)C)COC	C55168992
Cc1ccn2cc(nc2c1)C(=O)Nc3nc(c(s3)C(=O)C)c4ccccc4	C20004898
c1ccc(cc1)c2nc(no2)CNC(=O)[C@H]3Cc4cc(ccc4OC3)Cl	C63486836
Cc1cc2c(cc1S(=O)(=O)Nc3ccc(cc3)C(C)C)n(c(=O)n2C)C	C64976565
Cc1c(c([nH]c1I)C)C(=O)C	C05921271
C[C@H]1CCc2c(cc(s2)C(=O)NC3CCCC3)C1	C08076191
C#CCNC(=O)c1c(c2ccccc2s1)Cl	C12894639
Cc1cc2c(cn[nH]2)c(c1)I	C14984715
c1ccc2c(c1)[nH]c(=S)n2c3cc(cc(c3)F)F	C20586022
c1ccc2c(c1)CC[C@@H]2Nc3csc(n3)Cl	C48424987
c1ccc2c(c1)CC[C@H]2Nc3csc(n3)Cl	C48424988
c1ccc2c(c1)[C@@H](CCS2)Nc3cccc(n3)F	C48962408
c1ccc2c(c1)cc(cn2)[C@@H](c3ccccc3F)O	C62774166
c1cc(c(cc1Br)/C=C/2\C(=O)N(C(=S)S2)C3CCCCC3)O	C01175847
c1ccc2c(c1)[nH]c(n2)/C(=C\c3ccc(cc3)I)/C#N	C05042131
CC(=O)N(C)c1ccc2c(c1)[C@@H]3C=CC[C@H]3[C@@H](N2)c4c(cccc4Cl)Cl	C14546548
Cc1cccc2c1oc(c2)C(=O)Nc3cccc(c3)I	C41306809
c1cc2cc(oc2c(c1)F)C(=O)Nc3cccc(c3)I	C41307635
Cc1c2ccccc2sc1C(=O)NCc3cc(sc3)Br	C49467337
c1c(cnc(c1C(=O)NC23CC4CC(C2)CC(C4)C3)Cl)Br	C50044345
c1ccc(cc1)/C(=N/O)/c2cc3cc(cc(c3o2)Br)Br	C15986924
Cc1ccc(c(c1)C)c2nnc(o2)NC(=O)[C@@H]3CCCN(C3)S(=O)(=O)C	C13790306
CC(C)Cc1nnc(s1)NC(=O)c2cc(on2)c3ccc4c(c3)OCCO4	C27991125
c1ccc2c(c1)c(cn2c3ccc(cc3)[N+](=O)[O-])C(=O)C(=O)Nc4ccncc4	C45347905
c1cc(c(cc1n2cnnn2)NC(=O)/C=C/c3c(nc4n3ccs4)Cl)F	C58480466
C[C@H](c1cc2c(cc1Br)OCCO2)Nc3c(ncn3C)[N+](=O)[O-]	C64029963
c1cnc(cc1c2nc(no2)C3CC3)n4cc(nc4)C(=O)NC5CCCCC5	C65250958
c1ccc(c(c1)N2CCN(CC2)C(=O)C(=O)Nc3cccc(c3F)F)[N+](=O)[O-]	C65561415
Cc1ccc2c(c1)C(=NNC(=N2)c3ccc(cc3)C(C)C)c4cccs4	C04168592
Cc1ccc2c(c1)sc(n2)c3ccc(cc3)NC(=O)c4ccc(cc4Cl)C	C02976148
Cc1cccc(c1)c2[nH]c(c(n2)c3cccc4c3cccc4)c5ccccc5	C02399262
Cc1cc(c2c(c1)nc(s2)NC(=O)c3c(c4ccccc4s3)Cl)C	C06280872
c1cc(c(cc1Cl)c2csc(n2)NC(=O)C34CC5CC(C3)CC(C5)C4)Cl	C06864190
COc1ccc(cc1Nc2c3cc(ccc3nc4c2CCCC4)Cl)Cl	C04923961
c1cc(c(c(c1)Cl)Cl)/C=C/c2ccc3c(cc(c(c3n2)O)Cl)Cl	C04879271
COc1ccc(cc1)[C@@H]2[C@@H]3CC=C[C@@H]3c4c(c(cc(c4Cl)Cl)Cl)N2	C13635234
c1ccc2c(c1)ccc3c2[C@@H]4C=CC[C@H]4[C@H](N3)c5c(cccc5Cl)Cl	C15218446
c1cc(ccc1/C=N/Nc2ccnc3c2ccc(c3)Cl)Br	C04532320
C[C@]1(Nc2ccccc2-c3n1c4ccccc4n3)c5cccc6c5cccc6	C13776978
c1ccc2c(c1)cc3ccccc3c2/C=C/4\C(=O)N/C(=N\c5ccccc5Cl)/S4	C05004901
Cc1cc(c(c(c1)C)/C=C\2/C(=O)N/C(=N\c3ccccc3Cl)/S2)C	C59514429
C[C@@H]1[C@@H](N([C@H]([C@@H](C1(C#Cc2ccccc2)O)C)c3ccccc3)C)c4ccccc4	C13151753
CSc1nc(c2c3c(sc2n1)CCCC3)NC4CCCCCCC4	C12211052
c1cc(cc(c1)Cl)c2csc(n2)Nc3cc(cc(c3)Cl)Cl	C67321880
C[C@H]1CN/C(=N\c2c(cc(cc2Br)Br)Br)/S1	C35286971
c1cc(c(cc1Br)C(=O)Nc2c(ccc3c2ncs3)Cl)Cl	C37987507
c1cc(c(cc1Br)C(=O)Nc2nc3c(ccc(c3s2)Cl)Cl)Cl	C36695145
c1cc(ccc1[C@H](c2cc(sc2Br)Br)O)Br	C40260984
Cc1ccsc1C(=O)Nc2ccc(cc2Cl)I	C41968666
c1cc(ccc1c2csc3c2NC(=O)C[C@@H]3c4ccc(c(c4)Br)F)F	C46077132
Cc1cc(cc(c1NC(=O)c2ccc(cc2)I)C)Br	C48194314
c1cc(nc(c1)Br)NC(=O)c2cc(ccc2I)Cl	C49424217
c1ccc(c(c1)/C=C/2\C(=O)NC(=N2)c3cc(ccc3Cl)I)Cl	C01060799
c1cc(ncc1I)/N=C/c2cc(cc(c2O)Cl)Br	C16430019
c1ccc(cc1)N2C(=O)/C(=C/c3cc(c(c(c3)Cl)O)Cl)/SC2=S	C01186031
Cc1ccc2cc3cc(sc3nc2c1)C(=O)N[C@@H]4CCCc5c4cccc5	C04886188
c1cc2c(c(c1)F)SCC[C@@H]2Nc3ccc(cc3)I	C37247642
CC1(Cc2c(c(sc2c3c(cn[nH]3)Br)SC)C(=O)C1)C	C08567536
c1cc(c2c(c1F)c(=O)c(c[nH]2)c3c(cc(cn3)C(F)(F)F)Cl)F	C08580447
Cc1ccc(c(c1)[C@@H](c2cc(sc2Br)Br)O)F	C52999008
Cc1cccc(c1)c2c(n3cc(ccc3n2)Br)NC4CCCCC4	C04155368
Cc1cc(ccc1NC(=O)c2ccc(s2)c3nc4ccccc4s3)Cl	C08549193
c1cc(sc1)C(=O)Nc2nc(cs2)C34C[C@H]5C[C@@H](C3)CC(C5)(C4)Cl	C16778707
Cc1cc(c(c(c1)Br)N[C@H](C)c2ccc3c(c2)CCO3)Br	C37248672
c1ccc(cc1)C[C@H]2CCCN([C@@]23CC[C@@H](C3)c4ccccc4O)Br	C39510619
c1cc(ccc1/N=C\2/NC(=O)[C@H](S2)Cc3cc(cc(c3)Cl)Cl)Cl	C39847265
Cc1ccc(c2c1[C@@H]3C=CC[C@@H]3[C@@H](N2)c4ccc(cc4)OCc5ccc(cc5)Cl)C	C36080653
c1ccc2c(c1)C3=C(C2=O)[C@H](Sc4ccccc4N3)c5cccs5	C02327430
c1ccc2c(c1)C3=C(C2=O)[C@@H](Sc4ccccc4N3)c5ccsc5	C18254692
C[C@H](c1ccccn1)Nc2c(cc(cc2Cl)Br)Cl	C20505681
Cc1ccc(o1)CNc2cc(ccc2Br)Br	C37121604
C[C@]1(CC1(Br)Br)C(=O)Nc2cccc3c2cccc3	C02300673
c1cc(c(cc1/C=C/C(=O)c2ccc(s2)Br)Cl)O	C49371783
c1cc(cc(c1)Br)CNC(=O)c2cc3c(s2)CCCC3	C57416270
c1cc2cnccc2c(c1)CNc3c(cc(cc3Br)F)F	C61125084
c1ccc(c(c1)C(=O)Nc2ccccc2Cl)I	C00834190
c1ccc(c(c1)NC(=O)/C=C/c2c(cccc2Cl)Cl)Br	C00657405
c1cc(ccc1[C@H]2[C@@H]3CC=C[C@H]3c4cc(ccc4N2)Br)Cl	C13614505
CSc1ccc(cc1)[C@@H]2[C@H]3CC=C[C@@H]3c4cc(ccc4N2)I	C14551791
Cc1ccc(s1)[C@H](C)Nc2ccc(cc2C)I	C37057305
c1cc(ccc1CNc2cc(ccc2Br)Br)Br	C37121551
c1ccc(cc1)c2c[nH]c(=S)n2c3ccc(cc3Cl)Br	C37392525
c1ccc2c(c1)nc(s2)CNc3cccc(c3)I	C37977680
c1cc(c(cc1Br)F)[C@@H](c2ccc(s2)Br)O	C40265045
c1cc(ccc1[C@H](Cc2ccc(s2)Br)O)Br	C53781658
Cc1ccc(c(c1)C)NC(=O)C2=C(C(=O)OC23CCCCCC3)C	C06933585
c1ccc2c(c1)nc3cccc(c3n2)C(=O)Nc4ccccc4Cl	C09910310
Cc1cc(nc2c1c3c(s2)-c4nc5ccccc5n4CN3)C	C12324027
Cc1ccc(cc1)[C@@H]2[C@@H]3CC=C[C@H]3c4cc(cc(c4N2)[N+](=O)[O-])Cl	C32121188
c1ccc(cc1)/[NH+]=C/2\C=CC3=[N+](C4(CCCCC4)[N-]C3=C2)[O-]	C00343300
c1cc(ccc1N/N=C/2\CCS(=O)(=O)c3c2ccs3)F	C05769608
C[C@@H]1CCCC[C@H]1NC(=O)C2=C(C(=O)OC23CCC(CC3)C)C	C05058768
Cc1cccc2c1oc(c2C)C(=O)Nc3c(c4c(s3)CCC4)C#N	C64680077
C[C@@H]1C[C@H](CN(C1)c2c3c(c4cc(ccc4[nH]3)Br)ncn2)C	C02359332
Cc1cc(c(c(c1)/N=C/c2cc3c(cc2Br)OCO3)O)C	C00272469
Cc1cc(c2ccccc2n1)C(=O)Nc3nc4ccc(cc4s3)Cl	C07486070
c1ccc(cc1)c2nc3n(n2)C4(CCCCC4)[C@@H]5CCCC[C@@H]5N3	C13369827
Cc1cc(c2c(c1)[C@H]3C=CC[C@@H]3[C@H](N2)c4cc(ccc4Cl)[N+](=O)[O-])C	C19889262
Cn1cccc1/C=C\2/C(=O)N/C(=N\c3ccc(cc3Cl)Cl)/S2	C16977662
c1cc2c(c(c1)F)N[C@@H]([C@H]3[C@H]2C=CC3)c4ccc(c(c4)[N+](=O)[O-])Cl	C20704350
Cc1cc(ccc1NC(=O)c2ccc3c(c2)nc(o3)C)Cl	C49677123
Cc1ccc2c(c1)NC(=NC(=N2)c3ccccc3)c4cccnc4	C21169654
Cc1ccc(cc1)/N=C\2/N(C(=O)/C(=C/c3ccccc3O)/S2)C	C12630034
Cc1ccccc1/N=C\2/NC(=O)/C(=C/c3cn(c4c3cccc4)C)/S2	C09016038
COc1c(cc2ccccc2c1Br)C(=O)NC(=S)Nc3nc4c(s3)cccc4Cl	C14275643
CC(C)(C)c1ccc(cc1)[C@@H]2CC3=C([C@H](CC(=O)N3)c4cc(c(c(c4)Br)O)OC)C(=O)C2	C21255157
Cc1ccc(c(c1)C)C(=O)NC(=S)Nc2ccc(c(c2)c3nc4cc(cc(c4o3)C)C)Cl	C01862959
c1cc(sc1)C(=O)Nc2ccc(cc2)NC(=O)COc3cc(c(cc3Cl)Cl)Cl	C32204059
Cc1cc(c(cc1Cl)c2c3c([nH]n2)C(=O)N([C@@H]3c4ccc(cc4)Cl)Cc5ccccc5Cl)O	C39914777
c1ccc2c(c1)nc(o2)c3ccc(c(c3)NC(=S)NC(=O)Cc4ccc(cc4)Cl)Cl	C59365257
COc1ccc(c2c1[nH]nc2I)Cl	C14986105
CC(C)(C)[C@H]1CCc2c(sc3c2[C@@H](CC(=O)N3)c4ccncc4)C1	C15106913
Cc1cc2c(n1c3nc4c(s3)CCC4)CC(C[C@H]2O)(C)C	C41709775
Cc1c(sc2c1c(=O)[nH]c(n2)c3cccc(c3)Br)C	C16265918
[H]/N=C/1\C(=C2CCC[C@@H]2S1)c3nc4cc(ccc4n3CC)Cl	C37440382
Cc1ccsc1c2[nH]c(=O)c3c4c(sc3n2)CCCC4	C65002315
Cc1ccc(c(c1)NC(=O)C)C23CC4CC(C2)CC(C4)C3	C05007323
c1ccc(cc1)C(=O)Nc2c3c(cs2)c4ccccc4s3	C01872901
Cc1ccc(c(c1)Br)NC(=O)c2c(ccs2)C	C02653767
Cc1ccc(cc1)[C@H]2C3CCc4ccccc4C3=NC(=[NH+]2)[S-]	C32511737
c1ccc2c(c1)cc(cn2)N[C@@H]3CCc4ccccc4C3	C37284131
c1ccc2c(c1)cc(cn2)N[C@H]3CCc4ccccc4C3	C37284132
C[C@H]1CCc2c(cc(s2)C(=O)NC3CCCCC3)C1	C28085800
c1ccc(c(c1)Nc2ccnc3c2cccc3Cl)F	C39963786
c1ccc(cc1)C2=NN[C@H](S2)c3c(cccc3Cl)Cl	C59367424
c1ccc(cc1)/C(=N\O)/c2ccc3c4c2cccc4CC3	C08628520
c1ccc2c(c1)-c3ccccc3C2NC(=O)c4cccs4	C00105668
Cc1c2c(c(c3c1c4ccccc4[nH]3)SC)CCN=C2	C01580540
c1ccc(cc1)c2cc(nc3c2cccc3)c4ccc[nH]4	C06757267
Cc1nc2ccc(cc2s1)N[C@H]3CCCC[C@H]3C	C36956031
Cc1ccc(c(c1)C(=O)c2c[nH]c3c2c(ccc3)C)C	C37367648
Cc1cc(ccc1F)/N=C\c2cc(ccc2O)Cl	C40477024
CC1(Cc2c(ccn2CC3CCCCC3)[C@H](C1)O)C	C41715797
c1cc(cc(c1)O)Cc2nc3cccc(c3s2)Cl	C42418122
CC1(Cc2c(sc(n2)c3ccc(cc3F)F)[C@H](C1)O)C	C55266083
CCN1C(=O)/C(=C\c2ccc(s2)Cl)/SC1=O	C04695240
c1ccc2c(c1)CCc3ccccc3C2n4cncn4	C05517536
c1cnc(nc1)Oc2ccc(cc2)Br	C19502810
c1ccc(cc1)[C@H]2CN(CCO2)C(=O)[C@@H]3CCC=CC3	C32908854
c1csc2c1CN(CC2)Cc3c(snn3)Cl	C35176869
CN(C(=O)C12C[C@@H]3C[C@H](C1)CC(C3)(C2)Cl)OC	C36395898
CC(C)(C)/C(=C/[N+](=O)[O-])/I	C37632209
Cc1cc2c(nc1)sc(=S)n2c3ccccn3	C00481417
CC(C)n1cc(c2c1ncnc2Cl)Br	C43465523
c1csc2c1CN(CC2)c3c(nccn3)Cl	C43537519
Cc1cccc(c1C)N(C)C(=O)c2ccc(nc2)C	C49305258
Cc1nc2cc(cc(c2o1)C(=O)C)Br	C62536893
c1ccc(cc1)n2c(c(c(n2)/C(=C/c3cccc(c3F)F)/C#N)C#N)N	C03903034
CCn1c(=O)c2c3c(sc2nc1S[C@@H](C)C(=O)N)C[C@@H](CC3)C	C04935380
c1ccc(cc1)NC(=O)CCc2[nH]c(=O)c3c4c(sc3n2)CCCC4	C06083050
C[C@@H]1N=C(CS1)c2ccc(cc2)CNC(=O)c3ccc4c(c3)nc[nH]4	C39751970
CC(C)[C@H](c1cccs1)NC(=O)c2cc3c([nH]c2=O)CCCC3=O	C44907482
CN1CC(=O)Nc2c1ccc(c2)C(=O)NC3(CCC3)c4ccc(cc4)F	C64321484
c1ccc2c(c1)cc(cn2)NC(=O)C[C@@H]3C(=O)Nc4ccccc4S3	C25531653
Cc1cc(ccc1NC(=O)c2ccc[nH]c2=O)Br	C34938345
Cc1c(c(n[nH]1)C)NC(=O)c2csc3c2CCCC3	C36733890
CC(C)c1nc(cs1)[C@@H]2Nc3ccccc3C(=O)N2	C48707764
c1cc2c(c(c1)Cl)CC[C@@H]2Nc3cn[nH]c(=O)c3Cl	C48962729
c1cc(c(c(c1)F)C#N)n2c3c(ccc(c3F)F)nc2N	C53169932
c1ccc(c(c1)[C@@H]2CC3=N[C@H]4CCCC[C@@H]4NC=C3C(=O)C2)O	C17032133
c1cc(c(c(c1)Cl)NC(=O)c2ccc(=O)[nH]c2)Cl	C62158648
CC[C@@H]1CO[C@@H](CN1c2nc3ccc(cc3s2)N)C	C63103598
CC(C)c1ccc(cc1)c2nnc(s2)NC(=O)Cn3cnc4c(c3=O)ccs4	C07988537
COc1ccc(cc1)n2c(=O)c3ccccc3c(n2)C(=O)Nc4nc5ccccc5s4	C02943134
c1cc(cc(c1)Cl)NC(=O)[C@@H]2CCCN(C2)c3c4c(ncn3)n5c(n4)CCCCC5	C06724914
Cc1cc(n(n1)c2nc(cs2)c3ccc4c(c3)OCO4)NC(=O)c5cccs5	C38865358
Cc1ccc(cc1F)Cc2cnc(s2)NC(=O)c3ccc(c(c3)C)n4cnnn4	C40087290
Cc1ccc(cc1NC(=O)c2ccc3c(c2)nc(c(n3)C)C)c4nnc5n4CCCCC5	C45915291
Cc1cc(c(c(c1C)S(=O)(=O)Nc2cccc(c2)n3c(nnn3)SC)C)C	C31668791
CN(C)c1ccc(cc1)[C@@H]2C=Cc3c4ccccc4ccc3N2	C02173277
C1CCCC(CC1)NC(=O)C23CC4CC(C2)CC(C4)C3	C04725391
c1ccc(cc1)NC(=O)c2c(ccc(c2Cl)Cl)Cl	C01724301
c1ccc(c(c1)NC(=O)c2cccc(c2Cl)Cl)Cl	C00452465
c1cc2c(cc1c3ccc(c(c3)Cl)Cl)c(c[nH]2)C=O	C21950682
c1ccc2c(c1)c(c([nH]2)c3ccc(cc3Cl)Cl)C=O	C03675788
CC[C@H]1CS/C(=N\c2ccc-3c(c2)Cc4c3cccc4)/N1	C35294614
Cc1cccc(c1C)/N=C\2/N[C@@]3(CCC[C@@H](C3)C)CS2	C53099492
Cc1ccsc1[C@@H]2[C@H]3CC=C[C@@H]3c4cc(cc(c4N2)C)C	C13645486
Cc1ccc(cc1F)[C@H](c2c(c(cc(c2C)C)C)C)O	C40248803
CC(C)c1ccc(cc1)[C@@H](c2ccc(cc2F)F)O	C40248998
CCc1ccc(cc1)[C@@H](c2cc(ccc2Cl)Cl)O	C40254839
c1cc(c(cc1Br)[C@@H](C2=CCCCCC2)O)F	C50329432
Cc1cc(ccc1F)[C@H](c2ccc(cc2Cl)Cl)O	C63056678
Cc1ccc2c(c1)sc(n2)NC(=O)c3cc(sc3Cl)Cl	C04173437
Cc1ccccc1N2[C@H](Nc3ccccc3C2=O)c4c(ccs4)C	C00381898
CC(C)c1ccc(cc1)[C@@H]2CC(=O)NC3=C2C(=O)CC(C3)(C)C	C04912480
Cc1ccc(c(c1)C(=O)Nc2nc3cc(c(cc3s2)C)C)C	C05152420
Cc1cc(c(c(c1)Cl)NC(=O)c2ccc3ccccc3n2)C	C14669439
CON1[C@H](CCC[C@@]12CCC[C@@H](C2)c3ccccc3O)Cl	C39521872
CO[C@H]1CCC[C@]2(N1Cl)CCC[C@@H](C2)c3ccccc3O	C39524203
Cc1cc2c(c(c1Br)C)sc(n2)NN=C(C)C	C45888626
c1ccc(cc1)COc2ccccc2[C@H]3[C@H]4CC=C[C@@H]4c5cc(ccc5N3)Br	C14476337
Cc1cc(c(c(c1)Br)NCc2ccc(o2)[C@@H]3C[C@H]3C)Br	C20487534
CCc1c(c2ccccc2o1)CNc3ccc(cc3Br)Br	C36957069
c1ccc(c(c1)N[C@H]2CCOc3c2cc(cc3)Br)I	C37248448
C[C@@H](Cc1ccccc1Cl)N[C@@H](C)c2ccc(cc2)I	C37274424
C[C@H](c1c(ccs1)Br)Nc2ccc3c(c2)sc(n3)SC	C37278562
c1cc(sc1)C(c2cccs2)Nc3ccc(cc3Cl)I	C37313780
C[C@H](Cc1cccs1)N[C@@H](C)c2ccc(cc2Br)Br	C41649006
c1cc(ccc1c2csc3c2NC(=O)C[C@H]3c4cc(ccc4F)Br)F	C35511615
CC(C)CN1[C@@H]([C@H](c2ccccc2C1=O)C(=O)N(CC=C)c3ccccc3)c4cccs4	C09433153
Cc1ccc(cc1)SCC(=O)N(C[C@@H]2CCCO2)c3nc4c(cccc4s3)F	C10885188
CN(Cc1ccccc1F)C(=O)CSc2c3c(csc3ncn2)c4ccc(cc4)F	C11495957
Cc1cc(ccc1SCC(=O)OCC(=O)N2CCc3c2cccc3)Br	C03219589
C[C@@H](c1ccc(cc1)S(=O)(=O)C)N(C)C(=O)/C=C/c2ccc(s2)c3ccc(cc3)F	C12885627
C[C@@H](C(=O)N(C)Cc1ccccc1)Sc2c3c(csc3ncn2)c4ccccc4	C23561478
CCCc1nc(cs1)CSc2nc3ccc(cc3c(=O)n2CC)Br	C46582257
c1cc(cc(c1)I)C2=N/C(=C\c3cc4c(cc3Br)OCO4)/C(=O)O2	C08387308
CCN1c2ccc(cc2/C(=C/c3nc4ccccc4c(=O)n3Cc5ccccc5)/C1=O)Br	C08767610
c1cc(ccc1c2nnc(o2)CSc3nn(c(=S)s3)c4ccc(cc4)F)Br	C08825760
COc1c(cc(cc1Cl)Cl)/C=C/C(=O)N2CCN(CC2)c3c(c(c(c(c3F)F)F)F)F	C14277406
c1ccc(cc1)c2nnc(o2)[C@H](c3ccc(cc3)Br)N4CCN(CC4)c5ccccc5F	C21367044
c1ccc(c(c1)c2nnc(o2)CSc3c4c(csc4ncn3)c5ccc(cc5)F)Br	C21672054
c1cc(c(c(c1)Cl)Cl)N\2[C@@H]3CS(=O)(=O)C[C@H]3S/C2=N\C(=O)Cc4ccc(cc4)Cl	C32635058
Cc1ccc2nc(c(c(=O)n2c1)/C=C/3\C(=O)N(C(=S)S3)C4CCCC4)Sc5ccccc5	C33458994
c1ccc(cc1)c2c3c(c(=O)n(n2)Cc4ccc(cc4)Br)nc(s3)N5CCCCC5	C38485703
Cc1cc(n(n1)CCN(c2nc3c(cc(cc3s2)F)F)C(=O)c4ccc(cc4Cl)Cl)C	C38902417
COc1ccc(cc1OCc2ccc(cc2)Br)/C=c/3\c(=O)n4c5ccccc5nc4s3	C59167748
CC(C)(C)[C@H]1CCC2=C(C1)SC3=NC(=NC(=O)[C@@H]23)c4cc5cc(ccc5oc4=O)Br	C08588363
CC1(Cc2c(sc3c2c4nnc(n4c(n3)SC)SCc5ccc(cc5)Br)CO1)C	C02211605
CCOC(=O)c1c(c2ccccc2o1)CSc3nn(c(=S)s3)c4ccc(c(c4)Cl)Cl	C13098387
C[C@@H]1CC(Cc2c1sc3c2c(=O)n(c(n3)SCC(=O)N4CCc5c4cccc5)c6ccccc6)(C)C	C13858025
Cc1ccc(cc1)[C@H]2c3ccsc3CCN2C(=O)CN(CC=C)C(=O)c4cccc(c4)Br	C16502616
CCCOc1ccc(c(c1)C)c2c(cn(n2)c3ccccc3)/C=C/4\C(=O)N(C(=S)S4)C5CCCC5	C33674248
C[C@@H]1CN(CCN1C(=O)CCC2CCCC2)C(=O)CN3CCc4c(ccs4)[C@@H]3c5cccc(c5)F	C34829878
c1ccc2cc(ccc2c1)c3cn4c(csc4n3)CCN(C[C@@H]5CCCO5)C(=O)c6ccccc6F	C35201318
CC[C@H](C)N(CC(=O)N1CCc2c(ccs2)[C@@H]1c3ccc(cc3Cl)Cl)C(=O)c4ccccc4C	C35808624
Cc1ccc(c(c1)Cn2c3c(c4c(s3)CCC4)c(=O)n(c2=O)Cc5ccc(cc5)Br)C	C37640278
CCOc1c2ccccc2nc-3c1C(=O)CCc4c3n(c(c4I)C)Cc5ccccc5	C39457577
CC(C)Sc1ccc(cc1)C(=O)N(Cc2ccccn2)c3nc4ccc(cc4s3)Br	C39735501
CC(C)(C)c1ccc(cc1)C(=O)N(CC(=O)N2CCn3cccc3[C@@H]2c4cccc(c4)Cl)C(C)(C)C	C40383492
Cc1ccc(cc1)n2c(=O)c3c4c(sc3nc2SCC(=O)c5ccc(cc5)Cl)CO[C@H](C4)C(C)C	C01755265
Cc1ccccc1[C@H]2c3ccsc3CCN2C(=O)CN(CC(C)C)C(=O)COc4ccc(cc4)Cl	C16529106
CCCN(CC(=O)N1CCc2c(ccs2)[C@@H]1c3ccccc3C)S(=O)(=O)c4ccc5ccccc5c4	C16530910
COCCCN(CC(=O)N1CCc2c(ccs2)[C@H]1c3ccccc3)C(=O)C45CC6CC(C4)CC(C6)C5	C33786772
CCCCN([C@@H](C)c1nc2ccccc2c(=O)n1c3ccc(cc3C)Cl)C(=O)c4ccccc4Cl	C35042559
C[C@@]12CC[C@@](C1(C)C)(c3c2nc4ccccc4n3)C(=O)N5CCN(CC5)C(c6ccccc6)c7ccccc7	C33756504
CC(C)CN1C(=O)/C(=C\c2c(nc3ccccn3c2=O)Oc4ccc(cc4Cl)Cl)/SC1=S	C39835827
CCOc1ccc(c(c1)C)c2c(cn(n2)c3ccccc3)/C=C/4\C(=O)N(C(=S)S4)[C@H](C)c5ccccc5	C33860901
CCCc1nnc(s1)N2[C@H](c3c(=O)c4cc(ccc4oc3C2=O)CC)c5ccc(cc5)Br	C40038665
c1ccc(cc1)n2c(c3c(n2)CSC3)NC(=O)c4ccccc4S(=O)(=O)C(F)F	C08909505
c1cc(c(c(c1)Cl)Cl)/C=C\2/C(=O)N(C(=O)S2)CCNC(=O)c3cccnc3	C17193763
[H]/N=C\1/C(=C/c2cc(n(c2C)c3ccccc3Cl)C)/C(=O)N=C4N1N=C(S4)SCC	C33581929
Cc1cccc(n1)NC(=O)c2cccc(c2)S(=O)(=O)N3CCc4ccccc4C3	C12528494
C1CCC(CC1)C(=O)N2CCC[C@@H]2C(=O)N3CCC(CC3)CNC(=O)C(F)(F)F	C39303838
CC(C)[C@@H](C(=O)Nc1ccc(cc1)S(=O)(=O)Nc2nccs2)NC(=O)c3ccccc3Cl	C04522023
CCN(c1c(n(c(=O)[nH]c1=O)Cc2ccccc2)N)C(=O)CSc3cc(c4cccc(c4n3)C)C	C09960968
c1ccc2c(c1)c(n[nH]c2=O)CC(=O)NNC(=O)c3cc(nc4c3cccc4)c5ccccc5Cl	C17521312
COc1cc(cc2c1OCCO2)C(=O)Nc3cc(ccc3O)S(=O)(=O)Nc4cccc(c4)Cl	C25599236
Cc1ccccc1CS(=O)(=O)c2ncc(c(n2)C(=O)Nc3c(c4c(s3)CCCC4)C(=O)N)Cl	C38646037
C[C@@H](C(=O)NNC(=O)[C@H](C(C)C)NS(=O)(=O)c1ccc2ccccc2c1)Oc3ccccc3F	C22688771
CCCc1ccc(c(c1)N2CCN[C@@H](C2)S(=O)(=O)c3ccccc3)NS(=O)(=O)c4ccccc4O	C39481446
COc1ccc(cc1OC)[C@@H]2C[C@H](n3c(cc(n3)C(=O)Nc4cc(ccc4O)Cl)N2)C(F)(F)F	C00866010
Cc1ccc(cc1)c2nnc(o2)c3nc4ccccc4c(n3)NCCc5ccc(cc5)S(=O)(=O)N	C35558548
Cc1cc(c(n1c2nccs2)C)C(=O)COC(=O)CCNC(=O)NC34CC5CC(C3)CC(C5)C4	C11441339
c1ccc(c(c1)C(=O)OCC(=O)Nc2ccc(cn2)Cl)SCC(=O)Nc3ccc(cn3)Cl	C18267051
CCN(CC)S(=O)(=O)c1cccc(c1)C(=O)N[C@@H](C(C)C)C(=O)N[C@H](C)c2cc3ccccc3o2	C21557473
C[C@H](C(=O)NCC(=O)Nc1ccc(c(c1F)F)F)OC(=O)CCc2ncc(o2)c3ccc(cc3)F	C21793110
c1ccnc(c1)COc2cccc(c2)NC(=O)/C=C/c3ccc(cc3)S(=O)(=O)NCc4ccco4	C26253691
CCNC(=O)NC(=O)[C@H](C)Sc1nnc(n1[C@@H](C)[C@H]2C[C@H]3CC[C@@H]2C3)COc4ccccc4F	C36438435
Cn1c(nnc1SCC(=O)NCc2ccc(cc2)OC)CNC(=O)/C=C/c3ccccc3Cl	C39763781
CC[C@H](C)NS(=O)(=O)c1ccc(cc1)NC(=O)CSc2nc([nH]n2)N/N=C/c3ccccc3OC	C21080143
CCc1nnc(s1)NC(=O)[C@@H](C)Sc2nnc(n2CC=C)[C@H](CO)NC(=O)c3ccc(cc3)OC	C39743238
CCc1c(sc(n1)NC(=O)CSc2nnc(n2CC=C)[C@H](C(C)C)NC(=O)c3ccc(cc3)OC)C	C39759259
CCCCCOc1ccc(cc1OC)Cn2c3ccccc3nc2S[C@H]4[C@H]([C@@H]([C@@H]([C@@H](O4)CO)O)O)O	C39915947
c1ccc(cc1)n2c(nnc2SCC(=O)NNC(=O)c3ccccc3O)c4ccc(cc4)Cl	C00888234
CCn1c2ccc(cc2nc1SCc3csc(n3)Nc4ccc(cc4)OC)S(=O)(=O)N	C09200863
Cc1c2c(c(cn1)CO)Cc3c(nc(nc3SCC(=O)Nc4cccc(c4)O)c5ccccc5)O2	C09116176
C[C@@H](C(=O)NC(=O)N)OC(=O)c1cc(ccc1Cl)S(=O)(=O)N(CC=C)c2ccc(cc2)OC	C15229885
Cc1cc(c(c(c1)C)S(=O)(=O)N2CCCO[C@@H]2CNC(=O)C(=O)NCCc3c[nH]c4c3cccc4)C	C08830360
c1cc(ccc1NC(=O)CCSc2[nH]c(nn2)NN=C3CCCCC3)S(=O)(=O)N4CCCCCC4	C20836385
COC(=O)c1c2c(sc1NC(=O)CSc3nnc(n3N)c4ccc(cc4)[N+](=O)[O-])CCCC2	C59791063
CCOc1ccc(cc1)CNc2nc(n(n2)C(=O)c3ccccc3[N+](=O)[O-])NCc4ccc(cc4)OCC	C09948661
CC(C)[C@@H](C(=O)OCC(=O)NCC12CC3CC(C1)CC(C3)C2)NS(=O)(=O)c4ccc5c(c4)OCCO5	C12530954
c1ccc(cc1)CCOC(=O)CCC(=O)NC(=S)N2CCNC(=O)[C@@H]2CC(=O)OCc3ccccc3	C14011249
CCCCCCOc1ccccc1C(=O)NC(=S)N2CCNC(=O)[C@H]2CC(=O)OC[C@@H]3CCCO3	C14032914
CCCCCn1c(=O)c2ccccc2c(n1)C(=O)NNC(=O)CN(C)S(=O)(=O)c3ccc(cc3)C	C17406087
CCc1nnc(s1)NC(=O)[C@@H](C)Sc2nnc(n2CC=C)CCNC(=O)c3ccc(cc3)OC	C39744599
CCOc1cccc(c1)NC(=O)CSc2nc([nH]n2)N/N=C/c3ccccc3OCc4ccccc4	C59019219
c1ccc2c(c1)c(=O)c3ccccc3n2CC(=O)N4CCc5c(ccs5)[C@H]4c6cccs6	C14809685
c1cc(ccc1C=O)OC(=O)[C@@H]2C[C@@]3(C(=C([C@]2(C3(Cl)Cl)Cl)Cl)Cl)Cl	C16401328
c1ccc2c(c1)cc(cn2)CN3C[C@@H]4C[C@H](C3)c5ccc(c(=O)n5C4)c6cc7ccccc7s6	C20503199
c1ccc(cc1)N2[C@H]3CS(=O)(=O)C[C@@H]3N=C2SCc4ccc(cc4)Br	C32640838
CSc1ccc(cc1)C2=NN3[C@H](C2)c4cc(ccc4O[C@@H]3c5cccnc5)Br	C34887839
c1cc(ncc1Br)[C@@H](c2cc3c(cc2Br)OCCCO3)Br	C61870929
c1ccc(cc1)CCNC(=O)[C@H]2Cc3ccccc3CN2S(=O)(=O)c4cccs4	C01803462
CN1C(=O)/C(=C/c2cc(c(c(c2)Br)OCc3ccccc3)OC)/NC1=S	C09295842
COc1cc(ccc1N2CCCC2=O)NC(=O)/C=C/c3cc(ccc3F)Br	C12073085
Cc1c(c(n(n1)c2ccccc2)C)C(=O)C(=O)N[C@@H](C)c3ccccc3Br	C12780827
C[C@@H]1C[NH+](C[C@@H](O1)C)Cc2csc(n2)/N=C(/c3cc(ccc3Br)F)\[O-]	C22325559
C[C@@H](c1ccccc1)NC(=O)[C@@H]2CS[C@@H](N2C(=O)c3ccccc3Cl)c4ccoc4	C35196049
c1ccc(cc1)S(=O)(=O)NN2C(=O)/C(=C\c3ccc(cc3)Br)/SC2=S	C15986556
C[C@H](C1=NC(=O)C2=C(CSC2=N1)c3cccs3)Sc4ccc(cc4)NC(=O)C	C39422481
c1ccc2c(c1)CCC[C@@H]2C(=O)NCCN3C(=O)/C(=C/c4ccccc4F)/SC3=O	C58647683
c1ccc(cc1)CC(=O)Nc2ncc(s2)Cc3cccc(c3Cl)Cl	C00848289
c1ccc(cc1)[C@H](c2nc3ccccc3n2Cc4ccc(cc4Cl)Cl)O	C01122941
c1ccc2c(c1)C(c3ccccc3O2)CC(=O)NC4C5CC6CC(C5)CC4C6	C01059190
c1cc(ccc1Cc2cnc(s2)NC(=O)/C=C/c3ccc(cc3)Cl)F	C00943048
Cc1ccc(cc1)SCC(=O)Nc2nc(cs2)c3ccc4c(c3)CCCC4	C09630115
Cc1cc(c(c(c1)C)[C@@H]2[C@@H]3CC=C[C@@H]3c4cccc(c4N2)OC[C@@H]5CCCO5)C	C14458108
C[C@@H](C(=O)Nc1ccccc1Cl)Sc2nc3cc(ccc3s2)Cl	C15800030
CSc1ccc(cc1)C(=O)Nc2ccc(cc2)c3nc4ccccc4s3	C15881877
CCc1ccccc1NC2=NC(=O)/C(=C\c3ccc(cc3)Br)/S2	C20353484
CN(C(=S)NC1CCCCC1)[C@]2(CCCCC2=O)c3ccccc3Cl	C08691249
Cc1ccc(c(c1)C)C(=O)NCCc2csc(n2)c3ccc(cc3)Cl	C38667520
Cc1ccc(cc1C)c2csc(n2)/C(=C\Nc3ccccc3C(C)C)/C#N	C06755330
c1cc(cc2c1cc(c(c2)O)O)C34CC5CC(C3)CC(C5)C4	C05252428
c1cc2c(c(c1)F)SCC[C@@H]2Nc3ccc(cc3)O	C37316863
C[C@@]12CCCC([C@@H]1CC[C@]([C@@H]2CCO)(C)O)(C)C	C43730988
CC(C)(C)c1nc(c(s1)N)c2cccc(c2)Cl	C50309284
Cc1cccc2c1OCCC[C@H]2[NH2+][C@@H](C)c3ccc(s3)Cl	C37284716
CC[NH2+][C@H](C)c1c(c2cccc(c2o1)I)C	C40996285
C[C@H]1CCC[C@](C1)(c2nc(cs2)C(C)C)[NH2+]C3CC3	C41200242
CC(C)c1ccc(cc1)c2ccc(cc2)[C@@H]3C[NH2+]CCO3	C41438157
c1cc(sc1C[NH+]2CC[C@H]3CCCC[C@@H]3C2)C#CCCO	C43677948
C[NH2+][C@@H](c1ccc(c(c1)Cl)Cl)c2ccc(cn2)Br	C61861999
c1cc(c(c(c1)Cl)C[NH+]2CCCC[C@@H]2[C@@H]3CCCN3)Cl	C63188487
CC(=O)N1[C@@H](Cc2c3ccccc3[nH]c2[C@H]1c4ccccc4F)C(=O)OC	C04045724
Cc1c(cccc1Cl)c2ccc(o2)/C=C/3\C(=O)N=C(S3)NC(=O)C	C06008388
Cc1ccc(cc1)C2=N/C(=C\Nc3ccc(cn3)Br)/C(=O)O2	C03910971
Cc1nc2n(n1)c(c(s2)[C@@H](c3ccc(c(c3)F)F)[NH+]4CCCCC4)[O-]	C22626045
Cc1nc2n(n1)c(c(s2)[C@@H](c3ccc(cc3)Cl)[NH+]4CCCCC4)[O-]	C23156917
c1cc(c(cc1Cl)Cl)CNC(=O)N2CCN(CC2)c3nccs3	C54919590
Cc1c(c(n(n1)c2ccc(cc2)F)O)/C=N/c3c(c4c(s3)CCC4)C#N	C13601901
c1cc(ncc1Cl)NC(=O)C2CCN(CC2)C(=O)C=C3CCCCC3	C56083314
c1cc2cc(cc(c2nc1)C(=O)Nc3ccc4c(c3)nc(o4)C5CC5)Cl	C55305710
Cc1cc(ccc1S(=O)(=O)/N=c\2/[nH]c3c(s2)CN(CC3)C)Cl	C66248181
c1cc(ncc1Cl)N2CCN(CC2)C(=O)Nc3ccc(c(c3F)F)F	C66962462
Cc1ccsc1[C@H]2[C@H]3CC=C[C@@H]3c4cccc(c4N2)Cl	C13645449
Cc1ccsc1[C@H]2[C@@H]3CC=C[C@@H]3c4cccc(c4N2)Br	C14455850
Cc1ccc(cc1)[C@@H]2[C@H]3CC=C[C@@H]3c4ccc(c(c4N2)C)C	C14458444
c1cc(cc(c1)Br)NCc2ccc(s2)Cl	C20051848
C[C@@H]1CCC[C@@H](C1)Nc2ccccc2I	C20480163
c1ccc2c(c1)cccc2NCc3cccc(c3Cl)Cl	C21017386
C[C@H](c1ccccc1Cl)N[C@@H]2CCc3ccccc3C2	C35009640
c1ccc2c(c1)CC[C@H](C2)Nc3cccc(c3Cl)Cl	C37243659
c1cc2c(cc1NCc3cc(cc(c3)Cl)Cl)CCC2	C37423403
c1ccc(cc1)C#CCNc2ccccc2I	C51814094
CC(C)NS(=O)(=O)c1ccc(s1)Br	C00382526
c1c(cc(c(c1F)NC=C(C#N)C#N)Br)F	C15241338
C[C@@H]1CCc2c(cc(s2)C(=O)NCc3ccncc3)C1	C16579930
C[C@H]([C@H]1CCCO1)NC(=O)c2csc3c2CCCC3	C01002677
C[C@H]1CCCC[C@H]1N(C)C(=O)[C@@H]2c3ccccc3CCN2	C43512810
c1ccc2c(c1)CCN[C@@H]2C(=O)N3CCc4c3cccc4	C44426728
c1cc2c(c(c1)F)CC[C@@H]2NC(=O)c3ccnc(c3)Cl	C48948235
Cc1cnc(nc1)SCc2ccc(c(c2)C#CCO)F	C49623875
C[C@H](CN(C)C(=O)c1cc2c(s1)CCCCCC2)O	C51818418
c1ccc2c(c1)[C@@H]([C@@H](S2)CSc3[nH]ncn3)Cl	C64170243
CCC(CC)(CC(=O)Nc1c(cc(cc1Cl)Br)Cl)C(=O)[O-]	C10825781
c1cc(ccc1C(=O)[O-])NC(=O)c2c(c(c(cn2)Cl)Cl)Cl	C13166632
Cc1ccc(c(c1)C)C(=O)Nc2ccc(cc2C(=O)[O-])I	C13437845
c1ccc(cc1)Nn2c(nnc2[S-])c3ccc(cc3)Br	C26507605
c1ccc(cc1)COc2ccc3c(c2)c(c[nH]3)/C=C\4/C(=NC(=S)S4)[O-]	C27532461
c1ccc(c(c1)C(=O)[O-])NC(=O)c2cc(cnc2Cl)Br	C50045614
c1cc(ccc1c2c3c(sc2C(=O)[O-])[C@@H](CC(=O)N3)c4ccc(c(c4)F)F)F	C64796640
Cc1ccccc1NC(=O)c2c(ccs2)Br	C04542015
C[C@@]1(C[C@H]1Br)C(=O)Nc2c(c(c(c(c2F)F)F)F)F	C02311935
Cc1cc(cc(c1)C(=O)Nc2c(cc(cc2C)Br)C)C	C00588380
c1cnc2c(c1Br)c(c[nH]2)I	C16678067
c1cnccc1[C@@H](c2cc(sc2Br)Br)O	C40261139
Cc1cc2c(n1c3ccc(cn3)Br)CCC[C@H]2O	C41714957
Cc1cc2c(n1c3ccc(cc3)I)CCC[C@H]2O	C41715314
c1ccc(c(c1)c2c(c[nH]n2)Br)Br	C42415147
c1c(c(sc1Br)Br)[C@@H]([C@@H]2CCOC2)O	C48629356
c1ccc2c(c1)CCC[C@@H]2NC(=O)C34C[C@H]5C[C@@H](C3)CC(C5)(C4)Cl	C06232077
c1csc2c1c(=O)n(c(=S)[nH]2)[C@@H]3CCCc4c3ccs4	C61365295
c1c(c(sc1Br)Br)[C@H](c2c[nH]nc2)Cl	C62779097
c1cc(cc(c1)C(=S)N)Cn2cnc(c2Cl)Cl	C00161070
c1ccc2c(c1)C[C@H](CN2)NC(=O)Cc3ccccc3F	C19263483
CN(Cc1ccco1)c2ccc(cc2N)Br	C35701172
C[C@@H](c1cccs1)N[C@@H]2c3c(cc(cc3F)F)NC2=O	C42134560
CC(C)[NH+]1C[C@H]2CCC[C@@H](C1)C2N[C@@H]3CCC[C@@H]3C#N	C61892724
c1c(cc(n2c1ncc2F)Br)Br	C39463306
c1cc(c(cc1[C@@H]([C@H]2CCCCO2)Br)F)F	C50972985
C[C@@H](c1ccc(cn1)Br)[C@@H](C)Br	C63046244
Cc1c(cccc1Cl)n2ccnc2S[C@H](C)C(=O)NC(=O)NC	C12532128
C[C@H](c1cc2ccccc2o1)NC(=O)C(=O)Nc3cccc4c3ccnc4	C49202823
CC(=O)Nc1ccc(cc1)c2csc(n2)NC(=O)[C@H]3Cc4ccccc4O3	C15585722
Cc1c(cc(s1)[C@H]2NN=C(O2)C3CC3)NC(=O)C4=C[C@H]5C(=CC=N5)C=C4	C65149381
c1ccc2c(c1)CCCN2C(=S)NC(=O)CCCOc3ccc(cc3Cl)Cl	C02135728
c1cc2c3c(c1)c4c(cc3CC2)sc(n4)NC(=O)c5ccc(s5)Br	C09404682
CN(C)[P@](=S)(C(Cl)(Cl)Cl)Nc1ccc(cc1)I	C03259859
c1ccc(cc1)COc2cccc3c2N[C@@H]([C@H]4[C@@H]3C=CC4)c5ccc(cc5)Br	C13639233
CC(C)COc1cccc2c1N[C@@H]([C@@H]3[C@H]2C=CC3)c4ccc(cc4Cl)Cl	C20712599
C[C@@H](c1ccc(cc1)SC)Nc2ccc(cc2Cl)I	C37105305
Cc1cc(c(c2c1nccc2)N[C@@H](C)c3c(ccs3)Br)Cl	C37272707
Cc1ccc(cc1NC(=O)c2cc(ccc2I)Cl)Cl	C31678420
CS/C(=N/c1cc(ccc1Cl)Cl)/Nc2cc(ccc2Cl)Cl	C59449668
CCc1ccc(cc1)c2csc(n2)N[C@@H]3c4ccccc4C(=O)O3	C02479585
CC(C)Oc1ccc(cc1)C(=O)Nc2nc3ccc(cc3s2)Cl	C00371593
CCc1ccccc1n2c(c(cn2)C(=O)Nc3ccc(cc3C)C)C	C01018247
Cc1cccc2c1nc(s2)NC(=O)Cc3csc(n3)c4ccccc4	C07725082
Cc1ccc(cc1)Cc2cnc(s2)NC(=O)[C@@H]3Cc4ccccc4OC3	C08843784
c1ccc(cc1)/C=C\C(=O)Nc2cccc(c2)c3nc4ccccc4o3	C17241399
C[C@H]1C/C(=N\NS(=O)(=O)c2ccc(cc2)C(C)C)/CC(C1)(C)C	C20569280
Cc1c(nc2c(cnn2c1N[C@H](C)c3ccccc3)c4ccccc4)C	C27586203
C[C@H](C12CC3CC(C1)CC(C3)C2)NC(=O)c4c(cnc(n4)SC)Cl	C30682563
C[C@H]1CCc2c(sc(c2C(=O)OC)NC(=O)C3CCCCC3)C1	C01929355
Cc1ccc(cc1N[C@H](C)c2c(ccs2)Br)c3nnco3	C37293459
c1cc(c(cc1Cl)Cl)C(=O)Nc2nc(cs2)c3ccc(s3)Br	C11617276
CSc1cccc2c1nc(s2)NC(=O)c3ccccc3I	C12468003
CC1CCN(CC1)C(=O)c2cccc3c2N[C@@H]([C@@H]4[C@@H]3C=CC4)c5ccc(cc5)C(C)C	C14463087
CC1CCN(CC1)C(=O)c2ccc3c(c2)[C@@H]4C=CC[C@H]4[C@@H](N3)c5ccc(cc5)C(C)C	C14463410
CC(C)(C)c1ccc(cc1)[C@H]2CC3=C([C@@H](CC(=O)N3)c4cccc5c4cccc5)C(=O)C2	C21229266
Cc1ccc(cc1)S(=O)(=O)Nc2ccc(cc2Cl)I	C32631633
c1cc2c(cc1Br)[C@@H](CCO2)Nc3ccc(cc3Cl)I	C37313801
c1ccc(c(c1)NCc2cc3c(c(c2)Br)OCO3)I	C37324679
c1ccc2c(c1)c(c[nH]2)C3=CCN(CC3)C(=O)CC45C[C@H]6C[C@@H](C4)CC(C6)(C5)Br	C11072362
Cc1cc(c(c(c1)C)S(=O)(=O)Nc2ccc(cc2C)I)C	C03100370
COc1ccc(cc1C(=O)Nc2cc(c(cc2OC)Cl)OC)Cl	C01218172
Cc1cc(nc2c1c3ccccc3n2CCNC(=O)N(C(C)C)C(C)C)C	C05274236
C[C@@H](Cn1cnc2c1cccc2)C(=O)N/N=C/c3ccc(cc3Cl)Cl	C02367132
Cc1ccn2c(c1)nc(c2NC(=O)Cc3cccs3)c4ccccc4OC	C34912672
CC(C)(C)c1ccc(cc1)/C=N/NC(=O)[C@@H]2C=NN=C2c3cccs3	C39573725
Cc1c(sc(c1c2nc(no2)c3ccccc3)NC(=O)CC(C)C)C	C41000722
c1cc(ccc1COc2cc(ccc2Cl)Cl)C(=O)N	C16766944
Cc1cccc(c1NC(=O)N[C@@H]2CCc3c2cccc3)C(C)C	C33497695
Cc1cc(ccc1SCc2cn3cc(ccc3n2)Cl)N	C37193389
c1ccc2c(c1)CCN2C(=O)CSc3c(cccc3Cl)N	C37203978
CCN(c1cccc2c1cccc2)C(=O)c3c(ccs3)N	C40295759
CCCCc1cc(n(n1)c2ccccc2Br)N	C41483890
C[C@@H]1CC[C@H]([C@@](C1)(C(=O)[O-])[NH2+]C2CCCCCC2)C(C)C	C41659508
C[C@H](C(C)C)N(C)c1c(cc2c(n1)CCCC2)C(=S)N	C43410869
C[C@@H]1CCC[C@](C1)(CO)NC(=O)c2csc3c2cccc3	C53107474
COc1ccc(cc1)[C@H]2C=C(NC(=S)N2)c3cccs3	C08492675
c1cc(c(cc1Cl)Sc2c(c(ncn2)Cl)N)Cl	C62365290
CC[C@@H](C)[C@H](C(=O)Nc1nnc(s1)c2ccc(cc2)C)NC(=O)C[C@@H](C)CC(C)(C)C	C16571692
CCCCCSc1[nH]c(=O)c(c(n1)O)CCSCc2cccc3c2cccc3	C16855144
CCOc1cc(cc(c1OCc2ccccc2F)Br)CNC[C@@H](c3ccccc3)O	C16688714
CCCCNC(=O)[C@@H](C(CC)CC)N(CCC)C(=O)C(c1ccccc1)(c2ccccc2)O	C36573124
C[C@@H](CC(=O)N([C@@H](c1ccc(cc1)O)C(=O)NC(C)(C)CC(C)(C)C)C(C)(C)C)c2ccccc2	C36587915
CCOc1ccc(cc1OCC)[C@@H](C)NC(=O)CCNC(=O)C23CC4CC(C2)CC(C4)C3	C36758889
c1ccc(cc1)CCNCc2cc(ccc2OCC(=O)NCc3ccccc3)Br	C20500744
Cc1cccc(c1C)Nc2nnc(s2)SC[C@H](COCc3ccccc3OC)O	C58007460
CC(C)(C)c1cc(c(c(c1)C(C)(C)C)O)CSc2nc3ccccc3s2	C06693011
Cc1cc(c(c(c1)C)[C@H]2[C@H]3CC=C[C@@H]3c4cccc(c4N2)OCCCc5ccccc5)C	C14458059
CC(C)c1ccc(cc1)[C@H]2[C@H]3CC=C[C@@H]3c4cccc(c4N2)OCCCc5ccccc5	C14463312
c1ccc(cc1)COc2ccc(cc2)[C@H]3[C@@H]4CC=C[C@@H]4c5ccc(c(c5N3)Cl)Cl	C14469816
CCCCOc1ccc2c(c1)[C@@H]3C=CC[C@H]3[C@@H](N2)c4ccc5ccccc5c4	C14475391
c1ccc2cc(ccc2c1)[C@H]3[C@H]4CC=C[C@@H]4c5cc(ccc5N3)OCCC6CCCCC6	C14475488
c1ccc(cc1)COc2ccccc2[C@H]3[C@H]4CC=C[C@@H]4c5ccc(c(c5N3)Cl)Cl	C14476505
CC1([C@@H]([C@@H]1C(=O)Nc2ccc(cc2Cl)Cl)C=C(Cl)Cl)C	C04069813
c1cc(ccc1C(=O)/C=C/c2cc(cc(c2O)Cl)Cl)Cl	C04288281
C[C@H](c1ccc2ccccc2c1)NC(=O)c3cc(c(cc3Cl)F)F	C14424742
Cc1cc(c(c(c1)Cl)NC(=O)CSCc2ccc(cc2)Cl)C	C14669334
Cc1cc(ccc1Br)NCc2ccc(cc2)OC(F)(F)F	C21813941
Cc1ccc(c(c1OC)C)NCc2cc(ccc2F)Br	C37125687
CC(C)Oc1ccc(cc1)CNc2ccc(cc2F)Br	C37198522
c1cc(sc1CCNC(=O)c2cc(c(cc2Cl)Cl)F)Cl	C49356326
c1ccc(cc1)C(=O)[C@@H]2C[C@@H]2c3ccc4c(c3)OCO4	C16771438
Cc1c(nc(nc1Cl)c2ccc(o2)[C@H]3C[C@H]3C)C	C37947909
CN(C)c1nc(cs1)C(=O)c2ccc(s2)Cl	C57568450
Cc1ccc(cc1C)/N=C/c2ccc(o2)N3CCCC3	C59138596
c1cc(ccc1OC(=O)c2cc(ccn2)Cl)Cl	C60775607
Cc1cc(no1)COc2c(cccc2Cl)Cl	C61341309
c1ccc(cc1)Cc2c(n3cc(ccc3n2)Cl)C#N	C62431625
C1CCC(CC1)c2nnc(o2)SC3CCCCC3	C67652665
Cc1cccc(c1)CSc2nnc(n2C)C(C)C	C13995088
c1ccn2c(c1)c(nc2CCc3cccs3)C=O	C20222644
CCO[C@@H]1CCC[C@@]2(C1)CCC[C@@H](N2OCC)F	C39526521
CCC(=O)c1c(nn(c1C)Cc2ccc(cc2)Cl)C	C54716320
Cc1cc(c(c(c1)C)CSc2nncn2C3CC3)C	C64927547
C/C=C(\C)/CN(C)Cc1nc2ccccc2n1C	C65406175
CC(C)CC[C@@]1(CCO[C@@H](C1)C(C)C)CC/N=C/c2ccc(cc2)N(C)C	C04000014
CCc1cccc2c1n(/c(=N\C(=O)CCCSCc3ccccc3)/s2)C	C10617929
Cc1cc(ccc1C(C)C)OCCOc2ccc3ccccc3c2C=O	C11885823
COc1ccccc1C(=O)Oc2ccccc2/C=C/C(=O)c3ccc(cc3)Cl	C33622592
CCCCOC(=O)[C@@H]1CS[C@@H](N1C(=O)C2CCCC2)C3CCCCC3	C35124439
CCCCCCOC(=O)C1=NC2=C([C@H]1C)C(=O)C[C@H](C2)c3ccc(cc3)F	C39312379
Cc1cc2c(cc1C)n(c(=O)n2CCCOc3ccccc3C(C)C)C(=C)C	C40311427
C=CCn1c(nnc1SCc2ccc(c(c2)Cl)Cl)CCc3ccccc3	C14092453
C[C@@H]1[C@@H]([NH2+][C@@H]([C@@H](C1=NO)C)c2ccco2)c3ccco3	C04118974
C[C@H](C(C)(C)C)[NH+](C)CC(=O)NC(=O)NC(C)(C)C	C27133387
CC1CCC(CC1)C(=O)Nc2/c(=[NH+]\C)/c3ccccc3oc2O	C06823459
Cn1cc[nH+]c1CCNC(=O)c2ccc(cc2O)Cl	C45137373
CCNC(=O)NC(=O)C[NH+]1CC2C[C@H]3C[C@@H](C2)CC1C3	C49442865
C1CCCC(CC1)(C#N)NC(=O)C[NH+]2CCC[C@@H](C2)CO	C53674111
Cc1ccc(c(c1)n2c(c(nn2)C[NH3+])[C@@H]3CCCO3)C	C62219890
c1ccc2c(c1)nc(s2)N(C(=O)C3=COCCO3)/N=C/c4ccc(cc4)[N+](=O)[O-]	C05188007
CC(C)(C)CC(=O)N1CCN(CC1)c2c3c(ncn2)n(nn3)c4ccc(cc4)OC	C09850047
c1ccn2c(c1)nc3c(c2=O)cc(s3)C(=O)N4CCN(CC4)c5ccc(cc5)[N+](=O)[O-]	C15441491
c1cc(ccc1[N+](=O)[O-])OCC(=O)N2CCN(CC2)S(=O)(=O)c3ccc(s3)Cl	C15560052
COc1ccc(cc1)n2c3c(c(ncn3)N4CCN(CC4)C(=O)Cc5ccc(cc5)Cl)nn2	C15884062
CC(C)(C)c1nc(on1)CSc2c3c(nc(n2)C(C)(C)C)n(c(=O)n(c3=O)C)C	C24046098
CS(=O)(=O)N1CCC(CC1)C(=O)OCc2cc(on2)c3ccc4c(c3)OCO4	C38768308
c1cc(cc(c1)Br)c2nnc(o2)CN3C(=O)c4cccc(c4C3=O)[N+](=O)[O-]	C60203693
Cc1ccccc1CSc2nnc3n2c(c(c(=O)[nH]3)C)C	C04250427
Cc1cccn2c1nc(c2C[NH+]3[C@H](CCC[C@@H]3C)C)C(=O)[O-]	C31911041
c1cc(cc(c1)[C@H]2N[C@H]3C(=N2)C=NN3C[C@@H]4CCC=CC4)C#N	C39518727
c1conc1NC(=O)c2cc3c(n2C4CCCC4)ccs3	C40806224
Cc1cc(on1)CNC(=O)c2cc3ccccc3c(n2)Cl	C45005726
Cc1c(scn1)C(=O)Nc2nc(ns2)c3ccccc3	C48918821
CN([C@@H]1CCc2c1cccc2)C(=O)Nc3cccc4c3OCCO4	C56721613
c1ccn2cc(nc2c1)c3ccc(cc3)NC(=O)[C@H]4CCCO4	C21030792
Cc1cc(c2c(c1)N=C(C2)C(=O)NC3CCC4(CC3)OCCO4)C	C47672811
Cc1cc(cc(c1)NC(=O)[C@H]2c3ccccc3C(=O)N([C@@H]2c4cccs4)C)C	C06875535
CSc1c(cccn1)C(=O)Nc2nc(cs2)c3ccc(cc3)Cl	C07723715
c1ccc2c(c1)c(c[nH]2)CC(=O)N3CCC[C@@H](C3)c4nc5ccccc5s4	C08156790
c1cc(ccc1CN2C(=O)/C(=C\c3cc(cs3)Br)/NC2=O)Cl	C09263292
CC1([C@@H](N(C(=S)S1)c2ccccc2)/[N+](=C/c3c[nH]c4c3cccc4)/[O-])C	C01436923
Cc1ccc(cc1)[C@H]2c3c(c4ccccc4[nH]3)C(=O)[C@H]2Sc5nnc(s5)C	C21005839
c1ccc(cc1)n2c(c3c(n2)CCC3)NC(=O)c4cc(ccc4F)Br	C36632640
CC(C)S(=O)(=O)N1CCC[C@@H]([C@@]12CC[C@@H](C2)c3ccccc3O)Cl	C39510779
c1cc(cc(c1)Br)c2nnc(o2)CSc3ccc(cc3)O	C63563168
CCN1C(=O)/C(=C\c2c(nc3c(cccn3c2=O)C)N4CCOCC4)/SC1=S	C05790772
C[C@H]1CN(C[C@@H](O1)C)c2c(c(=O)n3ccccc3n2)/C=C/4\C(=O)N(C(=S)S4)C	C06932713
c1ccc(c(c1)S(=O)(=O)N2CCN(CC2)C(=O)[C@H]3CCS(=O)(=O)C3)Br	C16735421
CC(C)n1cnn(c1=S)CN2CCc3c2ccc(c3)S(=O)(=O)N4CCCCC4	C32803806
Cc1c(c(n(c(=O)c1C#N)C)N2CCOCC2)/C=C\3/C(=O)N(C(=S)S3)CC(C)C	C33390450
C[C@H]1CN(C[C@@H](O1)C)C(=O)CSc2c3c(n(c(=O)n2)Cc4ccccn4)CCC3	C38789975
C[C@H](c1ccccc1)n2cnnc2SCC(=C)Cl	C49517479
Cc1csc(n1)c2ccc(cc2)OCCCC(=O)C	C50161407
CCCN(C)C(=O)c1ccccc1C(=O)c2cccs2	C63678653
COc1ccc(cc1)NC[C@@H](Cn2cnc3cc(c(cc3c2=O)Cl)Br)O	C00638894
Cc1cccc(n1)CNc2c3c(c(sc3ncn2)C(=O)NC[C@H]4C[C@H]5C=C[C@@H]4C56CC6)C	C11786135
Cc1c(c(n(n1)C)C)NC(=O)[C@H](C)Sc2[nH]c(cn2)c3ccc(cc3)Br	C18963275
Cc1cccc(c1C)NC(=O)C(=O)NC[C@@H](c2cccn2C)N3CCc4ccccc4C3	C21155841
Cc1ccc(cc1)S(=O)(=O)n2cc(c3c2cccc3Br)C[C@@H](C(=O)OC)N	C37625320
c1cc2c(cc1C(=O)C[C@@H]3C(=O)N/C(=N\N=C\4/CCSC(=S)N4)/S3)CCCC2	C39886344
c1ccc2c(c1)C(=O)c3cccc(c3C2=O)NC(=S)N[C@@H]4CS(=O)(=O)C[C@@H]4Cl	C40167779
Cc1c(c(=O)n(n1C)c2ccccc2)c3c(n(c(c3C(=O)N)C)CCc4cccs4)C	C43225363
Cc1ccc(cc1NC(=S)NC(=O)c2cc3ccccc3cc2OC)c4nc5ccccc5o4	C02863863
Cc1ccc(cc1C)c2nc3cc(ccc3o2)NC(=S)NC(=O)c4cc(ccc4OC)Cl	C02145579
Cc1ccc(cc1C)C(=O)c2c(c(c3n2cccc3)c4nc(cs4)c5cc(ccc5OC)OC)N	C08844895
CCCCCCSc1nc2c(nn1)-c3cc(ccc3N[C@@H](O2)c4ccc(cc4)O)Br	C03655215
Cc1ccc(cc1NC(=S)NC(=O)c2cc(ccc2OC)Cl)c3nc4cc(ccc4o3)Cl	C09846240
CC(C)(C)[C@H]1CCc2c(sc3c2C(=N[C@H](N3)c4ccc(cc4)OC(=O)/C=C/c5ccc(cc5)OC)O)C1	C10058972
CCc1ccc(cc1)Nc2nnc(s2)SCc3[nH]c(=O)c4c5c(sc4n3)C[C@@H](CC5)C	C03322374
CCCOc1cccc(c1)C(=O)NC(=S)Nc2cc(ccc2C)c3nc4cc(ccc4o3)C	C14270693
Cc1ccc(cc1NC(=S)NC(=O)c2ccc(o2)c3ccc(cc3)Cl)c4cc5ccccc5oc4=O	C14274029
[truncated: 590 more rows]
